# Supplementary material
Source: PubMed Central journal article supplement (PMC4618030)
Supplement: NIHMS717334-supplement-000962_-_Supplemental_Material.pdf [file NIHMS717334-supplement-000962_-_Supplemental_Material.pdf]

## Supplemental Material

**Supplemental Table 1:** Imputation quality scores for all variants in analysis

| Cluster Number | Cyto    | rsID       | Minor Allele | Major Allele | MAF  | Imputation Quality |
|----------------|---------|------------|--------------|--------------|------|--------------------|
| 1.01           | 1p36.12 | rs1077514  | C            | T            | 0.14 | 0.9988             |
| 1.02           | 1p36.11 | rs12027135 | A            | T            | 0.46 | 0.9997             |
| 1.03           | 1p36.11 | rs12748152 | T            | C            | 0.07 | 0.9998             |
| 1.04           | 1p34.2  | rs4660293  | G            | A            | 0.24 | 0.9904             |
| 1.05           | 1p32.3  | rs2479409  | G            | A            | 0.33 | 0.9898             |
| 1.06           | 1p32.3  | rs17111584 | C            | T            | 0.05 | 0.9891             |
| 1.07           | 1p31.3  | rs2131925  | G            | T            | 0.35 | 0.9977             |
| 1.08           | 1p22.1  | rs7515577  | C            | A            | 0.21 | 0.9998             |
| 1.09           | 1p13.3  | rs629301   | G            | T            | 0.27 | 0.9999             |
| 1.10           | 1q21.2  | rs267733   | G            | A            | 0.17 | 0.9965             |
| 1.11           | 1q23.1  | rs12145743 | G            | T            | 0.34 | 0.9999             |
| 1.12           | 1q25.2  | rs4650994  | G            | A            | 0.48 | 1.0000             |
| 1.13           | 1q25.3  | rs1689800  | G            | A            | 0.36 | 0.9983             |
| 1.14           | 1q41    | rs2807834  | T            | G            | 0.33 | 0.9993             |
| 1.15           | 1q42.13 | rs4846914  | G            | A            | 0.40 | 0.9999             |
| 1.16           | 1q42.3  | rs514230   | A            | T            | 0.49 | 0.9951             |
| 2.01           | 2p24.1  | rs1367117  | A            | G            | 0.29 | 0.9989             |
| 2.02           | 2p23.3  | rs1260326  | T            | C            | 0.41 | 0.9975             |
| 2.03           | 2p21    | rs4299376  | G            | T            | 0.30 | 0.9978             |
| 2.04           | 2p15    | rs2710642  | G            | A            | 0.35 | 0.9972             |
| 2.05           | 2q14.1  | rs10490626 | A            | G            | 0.09 | 0.9917             |
| 2.06           | 2q14.2  | rs2030746  | T            | C            | 0.40 | 0.9964             |
| 2.07           | 2q21.3  | rs6759321  | T            | G            | 0.26 | 0.7340             |
| 2.08           | 2q24.3  | rs10195252 | C            | T            | 0.41 | 0.9587             |
| 2.09           | 2q31.1  | rs2287623  | G            | A            | 0.40 | 1.0000             |
| 2.10           | 2q33.1  | rs11694172 | G            | A            | 0.24 | 0.9952             |
| 2.11           | 2q35    | rs1250229  | T            | C            | 0.26 | 0.9780             |
| 2.12           | 2q36.3  | rs2943645  | C            | T            | 0.37 | 1.0000             |
| 2.13           | 2q37.1  | rs11563251 | T            | C            | 0.11 | 0.9277             |
| 3.01           | 3p25.3  | rs2606736  | C            | T            | 0.37 | 0.9988             |
| 3.02           | 3p25.1  | rs2290159  | C            | G            | 0.22 | 0.9606             |
| 3.03           | 3p22.3  | rs7640978  | T            | C            | 0.10 | 0.9995             |
| 3.04           | 3p21.31 | rs2290547  | A            | G            | 0.17 | 0.9993             |
| 3.05           | 3p21.31 | rs2013208  | T            | C            | 0.48 | 0.9995             |
| 3.06           | 3p21.1  | rs13326165 | A            | G            | 0.20 | 0.8937             |
| 3.07           | 3p14.3  | rs13315871 | A            | G            | 0.09 | 0.9969             |
| 3.08           | 3q13.33 | rs6805251  | T            | C            | 0.39 | 0.9953             |
| 3.09           | 3q22.1  | rs17404153 | T            | G            | 0.13 | 0.9963             |
| 3.10           | 3q22.3  | rs645040   | G            | T            | 0.23 | 0.9992             |
| 4.01           | 4p16.2  | rs6831256  | G            | A            | 0.42 | 0.9992             |
| 4.02           | 4p15.2  | rs10019888 | G            | A            | 0.17 | 0.9224             |
| 4.03           | 4q22.1  | rs442177   | G            | T            | 0.41 | 0.9720             |
| 4.04           | 4q22.1  | rs2199936  | A            | G            | 0.11 | 0.9989             |
| 4.05           | 4q22.1  | rs3822072  | A            | G            | 0.46 | 0.9981             |
| 4.06           | 4q23    | rs2602836  | A            | G            | 0.43 | 0.9999             |
| 4.07           | 4q24    | rs13107325 | T            | C            | 0.08 | 0.9893             |
| 5.01           | 5q11.2  | rs6450176  | A            | G            | 0.20 | 0.9675             |
| 5.02           | 5q11.2  | rs9686661  | T            | C            | 0.18 | 0.9176             |
| 5.03           | 5q13.3  | rs12916    | C            | T            | 0.39 | 0.9994             |
| 5.04           | 5q23.2  | rs4530754  | G            | A            | 0.46 | 0.9976             |

| Cluster Number | Cyto     | rsID       | Minor Allele | Major Allele | MAF  | Imputation Quality |
|----------------|----------|------------|--------------|--------------|------|--------------------|
| 5.05           | 5q33.3   | rs6882076  | T            | C            | 0.38 | 0.9914             |
| 6.01           | 6p22.3   | rs3757354  | T            | C            | 0.23 | 0.9985             |
| 6.02           | 6p22.1   | rs1800562  | A            | G            | 0.07 | 0.9984             |
| 6.03           | 6p21.32  | rs3177928  | A            | G            | 0.14 | 0.9999             |
| 6.04           | 6p21.31  | rs2814982  | T            | C            | 0.11 | 0.9865             |
| 6.05           | 6p21.2   | rs2758886  | A            | G            | 0.29 | 0.9982             |
| 6.06           | 6p21.1   | rs998584   | A            | C            | 0.49 | 0.9752             |
| 6.07           | 6q22.1   | rs9488822  | T            | A            | 0.35 | 0.9876             |
| 6.08           | 6q22.33  | rs1936800  | C            | T            | 0.50 | 0.9992             |
| 6.09           | 6q23.3   | rs9376090  | C            | T            | 0.26 | 0.9999             |
| 6.10           | 6q24.1   | rs605066   | C            | T            | 0.41 | 0.9944             |
| 6.11           | 6q25.3   | rs1564348  | C            | T            | 0.16 | 0.9980             |
| 6.12           | 6q26     | rs10455872 | G            | A            | 0.05 | 0.9909             |
| 7.01           | 7p22.3   | rs1997243  | G            | A            | 0.15 | 0.9942             |
| 7.02           | 7p22.1   | rs702485   | G            | A            | 0.46 | 0.9963             |
| 7.03           | 7p21.1   | rs4142995  | T            | G            | 0.40 | 0.9778             |
| 7.04           | 7p15.3   | rs2285942  | T            | C            | 0.15 | 0.9979             |
| 7.05           | 7p15.2   | rs4722551  | C            | T            | 0.16 | 0.9931             |
| 7.06           | 7p13     | rs2072183  | C            | G            | 0.19 | 0.9183             |
| 7.07           | 7p12.2   | rs4917014  | G            | T            | 0.32 | 0.9981             |
| 7.08           | 7q11.23  | rs7811265  | G            | A            | 0.19 | 0.9564             |
| 7.09           | 7q31.2   | rs38855    | G            | A            | 0.47 | 0.9988             |
| 7.10           | 7q32.2   | rs4731702  | T            | C            | 0.50 | 0.9979             |
| 7.11           | 7q36.1   | rs17173637 | C            | T            | 0.09 | 0.9998             |
| 8.01           | 8p23.1   | rs9987289  | A            | G            | 0.09 | 0.9855             |
| 8.02           | 8p23.1   | rs11776767 | C            | G            | 0.38 | 0.9889             |
| 8.03           | 8p22     | rs1495743  | G            | C            | 0.22 | 0.9991             |
| 8.04           | 8p21.3   | rs12678919 | G            | A            | 0.10 | 0.9985             |
| 8.05           | 8q11.23  | rs10102164 | A            | G            | 0.20 | 0.9998             |
| 8.06           | 8q12.1   | rs1030431  | A            | G            | 0.32 | 0.9993             |
| 8.07           | 8q23.3   | rs2293889  | T            | G            | 0.42 | 0.9935             |
| 8.08           | 8q24.13  | rs2954029  | T            | A            | 0.46 | 0.9783             |
| 8.09           | 8q24.3   | rs11136341 | G            | A            | 0.35 | 0.9952             |
| 9.01           | 9p24.2   | rs3780181  | G            | A            | 0.07 | 0.9727             |
| 9.02           | 9p22.3   | rs643531   | C            | A            | 0.14 | 0.9970             |
| 9.03           | 9q31.1   | rs1883025  | T            | C            | 0.27 | 0.9961             |
| 9.04           | 9q34.2   | rs649129   | T            | C            | 0.20 | 0.9923             |
| 10.01          | 10p15.1  | rs1832007  | G            | A            | 0.15 | 0.9990             |
| 10.02          | 10p12.33 | rs10904908 | G            | A            | 0.42 | 0.9880             |
| 10.03          | 10q11.21 | rs970548   | C            | A            | 0.25 | 0.9990             |
| 10.04          | 10q21.2  | rs10761731 | T            | A            | 0.42 | 0.9842             |
| 10.05          | 10q23.33 | rs2068888  | A            | G            | 0.46 | 0.9947             |
| 10.06          | 10q25.2  | rs2255141  | A            | G            | 0.28 | 0.9992             |
| 11.01          | 11p15.4  | rs2923084  | G            | A            | 0.18 | 0.9810             |
| 11.02          | 11p15.1  | rs10832963 | T            | G            | 0.26 | 0.9616             |
| 11.03          | 11p11.2  | rs3136441  | C            | T            | 0.14 | 0.9983             |
| 11.04          | 11p11.12 | rs11246602 | C            | T            | 0.12 | Genotyped          |
| 11.05          | 11q12.2  | rs174546   | T            | C            | 0.35 | 0.9999             |
| 11.06          | 11q13.1  | rs12801636 | A            | G            | 0.22 | 0.9992             |
| 11.07          | 11q13.5  | rs499974   | A            | C            | 0.17 | 1.0000             |
| 11.08          | 11q23.3  | rs964184   | G            | C            | 0.13 | 0.9992             |
| 11.09          | 11q23.3  | rs11603023 | T            | C            | 0.43 | 0.9992             |
| 11.10          | 11q24.1  | rs7941030  | C            | T            | 0.38 | 0.9997             |
| 11.11          | 11q24.2  | rs11220462 | A            | G            | 0.13 | 0.9981             |
| 12.01          | 12p13.31 | rs4883201  | G            | A            | 0.11 | 0.9953             |
| 12.02          | 12p12.2  | rs7134375  | A            | C            | 0.43 | 0.9979             |
| 12.03          | 12p12.1  | rs12317268 | G            | A            | 0.16 | 0.9996             |
| 12.04          | 12q13.3  | rs11613352 | T            | C            | 0.23 | 0.9985             |

| Cluster Number | Cyto     | rsID       | Minor Allele | Major Allele | MAF  | Imputation Quality |
|----------------|----------|------------|--------------|--------------|------|--------------------|
| 12.05          | 12q24.11 | rs7134594  | C            | T            | 0.46 | 1.0000             |
| 12.06          | 12q24.12 | rs11065987 | G            | A            | 0.43 | 0.9984             |
| 12.07          | 12q24.31 | rs1169288  | C            | A            | 0.28 | 0.9792             |
| 12.08          | 12q24.31 | rs4759375  | T            | C            | 0.10 | 1.0000             |
| 12.09          | 12q24.31 | rs4765127  | T            | G            | 0.34 | 0.9783             |
| 12.10          | 12q24.31 | rs838880   | C            | T            | 0.30 | 0.9735             |
| 13.01          | 13q13.1  | rs4942486  | T            | C            | 0.47 | 0.9997             |
| 14.01          | 14q12    | rs2332328  | T            | C            | 0.46 | 0.9777             |
| 14.02          | 14q32.33 | rs4983559  | G            | A            | 0.38 | 0.9872             |
| 15.01          | 15q15.3  | rs8035382  | C            | T            | 0.05 | Genotyped          |
| 15.02          | 15q22.1  | rs1532085  | A            | G            | 0.38 | 0.9987             |
| 15.03          | 15q22.2  | rs2652834  | A            | G            | 0.20 | 0.9994             |
| 16.01          | 16p13.11 | rs3198697  | T            | C            | 0.41 | 0.9977             |
| 16.02          | 16p11.2  | rs11649653 | G            | C            | 0.40 | 0.9992             |
| 16.03          | 16q12.2  | rs1121980  | A            | G            | 0.43 | 0.9999             |
| 16.04          | 16q13    | rs3764261  | A            | C            | 0.34 | 0.9997             |
| 16.05          | 16q22.1  | rs16942887 | A            | G            | 0.13 | 0.9997             |
| 16.06          | 16q22.3  | rs2000999  | A            | G            | 0.18 | 0.9991             |
| 16.07          | 16q23.2  | rs2925979  | T            | C            | 0.29 | 0.9806             |
| 17.01          | 17p13.1  | rs314253   | C            | T            | 0.36 | 0.9935             |
| 17.02          | 17q12    | rs881844   | C            | G            | 0.34 | 0.9989             |
| 17.03          | 17q21.31 | rs8077889  | C            | A            | 0.21 | 0.9999             |
| 17.04          | 17q21.32 | rs7225700  | T            | C            | 0.36 | 0.9925             |
| 17.05          | 17q24.2  | rs1801689  | C            | A            | 0.03 | 0.9262             |
| 17.06          | 17q24.2  | rs4148008  | G            | C            | 0.31 | 0.9891             |
| 17.07          | 17q25.3  | rs4082919  | T            | G            | 0.48 | 0.9706             |
| 18.01          | 18q21.1  | rs7241918  | G            | T            | 0.18 | 0.9927             |
| 18.02          | 18q21.32 | rs12967135 | A            | G            | 0.23 | 0.9987             |
| 19.01          | 19p13.2  | rs7248104  | A            | G            | 0.41 | 0.9994             |
| 19.02          | 19p13.2  | rs7255436  | C            | A            | 0.49 | 0.9901             |
| 19.03          | 19p13.2  | rs11672123 | A            | G            | 0.04 | 0.9595             |
| 19.04          | 19p13.2  | rs6511720  | T            | G            | 0.15 | 0.9935             |
| 19.05          | 19p13.2  | rs737337   | C            | T            | 0.08 | 0.9994             |
| 19.06          | 19p13.11 | rs10401969 | C            | T            | 0.09 | 0.9998             |
| 19.07          | 19q13.11 | rs731839   | G            | A            | 0.34 | 0.9980             |
| 19.08          | 19q13.32 | rs7412     | T            | C            | 0.14 | 0.9781             |
| 19.09          | 19q13.32 | rs4420638  | G            | A            | 0.12 | 0.9981             |
| 19.10          | 19q13.33 | rs492602   | G            | A            | 0.48 | 1.0000             |
| 19.11          | 19q13.33 | rs17695224 | A            | G            | 0.27 | 0.9995             |
| 19.12          | 19q13.42 | rs386000   | C            | G            | 0.21 | 0.9824             |
| 20.01          | 20p12.1  | rs364585   | A            | G            | 0.39 | 0.9991             |
| 20.02          | 20p12.1  | rs2328223  | C            | A            | 0.18 | 0.9968             |
| 20.03          | 20q11.22 | rs2277862  | T            | C            | 0.15 | 0.9999             |
| 20.04          | 20q12    | rs2902940  | G            | A            | 0.27 | 0.9908             |
| 20.05          | 20q12    | rs909802   | T            | C            | 0.47 | 0.9990             |
| 20.06          | 20q13.12 | rs1800961  | T            | C            | 0.03 | 0.9978             |
| 20.07          | 20q13.12 | rs6065906  | C            | T            | 0.18 | 0.9963             |
| 22.01          | 22q11.21 | rs181362   | T            | C            | 0.19 | 0.9999             |
| 22.02          | 22q12.2  | rs5763662  | T            | C            | 0.03 | 0.9948             |
| 22.03          | 22q12.3  | rs138777   | A            | G            | 0.34 | 0.9648             |
| 22.04          | 22q13.1  | rs5756931  | C            | T            | 0.39 | 0.9902             |
| 22.05          | 22q13.31 | rs4253772  | T            | C            | 0.11 | 0.9992             |

Cluster number: unique numeric identifier for each of the SNPs in the analysis

Cyto: cytogenic position of each of the SNPs

rsID: SNP name

MAF: minor allele frequency

**Supplemental Table 2a:** List of SNPs used in analysis or proxies from GWAS of circulating lipoproteins. All index variants from candidate loci identified for association with baseline lipid levels from the Global Lipids Genetics Consortium<sup>1,2</sup>

| Cyto    | rsID       | Locus Name         | Chr | Position (hg18) | Proxy | Original rsID (GLGC) |
|---------|------------|--------------------|-----|-----------------|-------|----------------------|
| 1p36.12 | rs1077514  | <i>ASAP3</i>       | 1   | 23638820        |       |                      |
| 1p36.11 | rs12027135 | <i>LDLRAP1</i>     | 1   | 25648320        |       |                      |
| 1p36.11 | rs12748152 | <i>PIGV-NROB2</i>  | 1   | 27010980        |       |                      |
| 1p34.2  | rs4660293  | <i>PABPC4</i>      | 1   | 39800767        |       |                      |
| 1p32.3  | rs2479409  | <i>PCSK9</i>       | 1   | 55277238        |       |                      |
| 1p31.3  | rs2131925  | <i>ANGPTL3</i>     | 1   | 62798530        |       |                      |
| 1p22.1  | rs7515577  | <i>EVI5</i>        | 1   | 92782026        |       |                      |
| 1p13.3  | rs629301   | <i>SORT1</i>       | 1   | 109619829       |       |                      |
| 1q21.2  | rs267733   | <i>ANXA9-CERS2</i> | 1   | 149225460       |       |                      |
| 1q23.1  | rs12145743 | <i>HDGF-PMVK</i>   | 1   | 154967275       |       |                      |
| 1q25.2  | rs4650994  | <i>ANGPTL1</i>     | 1   | 176781935       |       |                      |
| 1q25.3  | rs1689800  | <i>ZNF648</i>      | 1   | 180435508       |       |                      |
| 1q41    | rs2807834  | <i>MOSCI</i>       | 1   | 219037216       |       |                      |
| 1q42.13 | rs4846914  | <i>GALNT2</i>      | 1   | 228362314       |       |                      |
| 1q42.3  | rs514230   | <i>IRF2BP2</i>     | 1   | 232925220       |       |                      |
| 2p24.1  | rs1367117  | <i>APOB</i>        | 2   | 21117405        |       |                      |
| 2p23.3  | rs1260326  | <i>GCKR</i>        | 2   | 27584444        |       |                      |
| 2p21    | rs4299376  | <i>ABCG5-8</i>     | 2   | 43926080        |       |                      |
| 2p15    | rs2710642  | <i>EHBP1</i>       | 2   | 63003061        |       |                      |
| 2q14.1  | rs10490626 | <i>INSIG2</i>      | 2   | 118552311       |       |                      |
| 2q14.2  | rs2030746  | <i>LOC84931</i>    | 2   | 121025958       |       |                      |
| 2q21.3  | rs6759321  | <i>RABGAP1</i>     | 2   | 136039146       |       |                      |
| 2q24.3  | rs10195252 | <i>COBLL1</i>      | 2   | 165221337       |       |                      |
| 2q31.1  | rs2287623  | <i>ABCBI1</i>      | 2   | 169538401       |       |                      |
| 2q33.1  | rs11694172 | <i>FAM117B</i>     | 2   | 203240549       |       |                      |
| 2q35    | rs1250229  | <i>FNI</i>         | 2   | 216012629       |       |                      |
| 2q36.3  | rs2943645  | <i>IRS1</i>        | 2   | 226807424       |       |                      |
| 2q37.1  | rs11563251 | <i>UGT1A1</i>      | 2   | 234344123       |       |                      |
| 3p25.3  | rs2606736  | <i>ATG7</i>        | 3   | 11375249        |       |                      |
| 3p25.1  | rs2290159  | <i>RAF1</i>        | 3   | 12603920        |       |                      |
| 3p22.3  | rs7640978  | <i>CMTM6</i>       | 3   | 32508014        |       |                      |
| 3p21.31 | rs2290547  | <i>SETD2</i>       | 3   | 47036187        |       |                      |
| 3p21.31 | rs2013208  | <i>RBM5</i>        | 3   | 50104403        |       |                      |
| 3p21.1  | rs13326165 | <i>STAB1</i>       | 3   | 52507158        |       |                      |
| 3p14.3  | rs13315871 | <i>PXK</i>         | 3   | 58356327        |       |                      |
| 3q13.33 | rs6805251  | <i>GSK3B</i>       | 3   | 121043296       |       |                      |
| 3q22.1  | rs17404153 | <i>ACAD11</i>      | 3   | 133645890       |       |                      |
| 3q22.3  | rs645040   | <i>MSL2L1</i>      | 3   | 137409312       |       |                      |
| 4p16.2  | rs6831256  | <i>LRPAP1</i>      | 4   | 3442937         |       |                      |
| 4p15.2  | rs10019888 | <i>C4orf52</i>     | 4   | 25672088        |       |                      |
| 4q22.1  | rs442177   | <i>KLHL8</i>       | 4   | 88249285        |       |                      |
| 4q22.1  | rs3822072  | <i>FAM13A1</i>     | 4   | 89960292        |       |                      |
| 4q23    | rs2602836  | <i>ADH5</i>        | 4   | 100233828       |       |                      |
| 4q24    | rs13107325 | <i>SLC39A8</i>     | 4   | 103407732       |       |                      |
| 5q11.2  | rs6450176  | <i>ARL15</i>       | 5   | 53333782        |       |                      |
| 5q11.2  | rs9686661  | <i>MAP3K1</i>      | 5   | 55897543        |       |                      |
| 5q13.3  | rs12916    | <i>HMGCR</i>       | 5   | 74692295        |       |                      |
| 5q23.2  | rs4530754  | <i>CSNK1G3</i>     | 5   | 122883315       |       |                      |
| 5q33.3  | rs6882076  | <i>TIMD4</i>       | 5   | 156322875       |       |                      |
| 6p22.3  | rs3757354  | <i>MYLIP</i>       | 6   | 16235386        |       |                      |
| 6p22.1  | rs1800562  | <i>HFE</i>         | 6   | 26201120        |       |                      |
| 6p21.32 | rs3177928  | <i>HLA</i>         | 6   | 32520413        |       |                      |
| 6p21.31 | rs2814982  | <i>C6orf106</i>    | 6   | 34654538        |       |                      |

| Cyto     | rsID       | Locus Name          | Chr | Position (hg18) | Proxy | Original rsID (GLGC) |
|----------|------------|---------------------|-----|-----------------|-------|----------------------|
| 6p21.2   | rs2758886  | <i>KCNK17</i>       | 6   | 39358815        |       |                      |
| 6p21.1   | rs998584   | <i>VEGFA</i>        | 6   | 43865874        |       |                      |
| 6q22.1   | rs9488822  | <i>FRK</i>          | 6   | 116419586       |       |                      |
| 6q22.33  | rs1936800  | <i>RSPO3</i>        | 6   | 127477757       |       |                      |
| 6q23.3   | rs9376090  | <i>HBS1L</i>        | 6   | 135452921       |       |                      |
| 6q24.1   | rs605066   | <i>CITED2</i>       | 6   | 139871359       |       |                      |
| 6q25.3   | rs1564348  | <i>LPA</i>          | 6   | 160498850       |       |                      |
| 7p22.3   | rs1997243  | <i>GPR146</i>       | 7   | 1050303         |       |                      |
| 7p22.1   | rs702485   | <i>DAGLB</i>        | 7   | 6415797         |       |                      |
| 7p21.1   | rs4142995  | <i>SNX13</i>        | 7   | 17885783        |       |                      |
| 7p15.3   | rs2285942  | <i>DNAH11</i>       | 7   | 21549442        |       |                      |
| 7p15.2   | rs4722551  | <i>MIR148A</i>      | 7   | 25958351        |       |                      |
| 7p13     | rs2072183  | <i>NPC1L1</i>       | 7   | 44545705        |       |                      |
| 7p12.2   | rs4917014  | <i>IKZF1</i>        | 7   | 50276409        |       |                      |
| 7q11.23  | rs7811265  | <i>MLXIPL</i>       | 7   | 72572446        |       |                      |
| 7q31.2   | rs38855    | <i>MET</i>          | 7   | 116145280       |       |                      |
| 7q32.2   | rs4731702  | <i>KLF14</i>        | 7   | 130083924       |       |                      |
| 7q36.1   | rs17173637 | <i>TMEM176A</i>     | 7   | 150160382       |       |                      |
| 8p23.1   | rs9987289  | <i>PPP1R3B</i>      | 8   | 9220768         |       |                      |
| 8p23.1   | rs11776767 | <i>PINX1</i>        | 8   | 10721339        |       |                      |
| 8p22     | rs1495743  | <i>NAT2</i>         | 8   | 18317580        |       |                      |
| 8p21.3   | rs12678919 | <i>LPL</i>          | 8   | 19888502        |       |                      |
| 8q11.23  | rs10102164 | <i>SOX17</i>        | 8   | 55584167        |       |                      |
| 8q12.1   | rs1030431  | <i>CYP7A1</i>       | 8   | 59474251        |       |                      |
| 8q23.3   | rs2293889  | <i>TRPS1</i>        | 8   | 116668374       |       |                      |
| 8q24.13  | rs2954029  | <i>TRIB1</i>        | 8   | 126560154       |       |                      |
| 8q24.3   | rs11136341 | <i>PLEC1</i>        | 8   | 145115531       |       |                      |
| 9p24.2   | rs3780181  | <i>VLDLR</i>        | 9   | 2630759         |       |                      |
| 9p22.3   | rs643531   | <i>TTC39B</i>       | 9   | 15286034        |       |                      |
| 9q31.1   | rs1883025  | <i>ABCA1</i>        | 9   | 106704122       |       |                      |
| 9q34.2   | rs649129   | <i>ABO</i>          | 9   | 135144125       |       |                      |
| 10p15.1  | rs1832007  | <i>AKR1C4</i>       | 10  | 5244847         |       |                      |
| 10p12.33 | rs10904908 | <i>TRDMT1</i>       | 10  | 17300296        |       |                      |
| 10q11.21 | rs970548   | <i>MARCH8-ALOX5</i> | 10  | 45333283        |       |                      |
| 10q21.2  | rs10761731 | <i>JMJD1C</i>       | 10  | 64697616        |       |                      |
| 10q23.33 | rs2068888  | <i>CYP26A1</i>      | 10  | 94829632        |       |                      |
| 10q25.2  | rs2255141  | <i>GPAM</i>         | 10  | 113923876       |       |                      |
| 11p15.4  | rs2923084  | <i>AMPD3</i>        | 11  | 10345358        |       |                      |
| 11p15.1  | rs10832963 | <i>SPTY2D1</i>      | 11  | 18620817        |       |                      |
| 11p11.2  | rs3136441  | <i>LRP4</i>         | 11  | 46699823        |       |                      |
| 11p11.12 | rs11246602 | <i>OR4C46</i>       | 11  | 51368666        |       |                      |
| 11q12.2  | rs174546   | <i>FADS123</i>      | 11  | 61326406        |       |                      |
| 11q13.1  | rs12801636 | <i>KAT5</i>         | 11  | 65147893        |       |                      |
| 11q13.5  | rs499974   | <i>MOGAT2-DGAT2</i> | 11  | 75132669        |       |                      |
| 11q23.3  | rs964184   | <i>APOA1C3A4A5</i>  | 11  | 116154127       |       |                      |
| 11q23.3  | rs11603023 | <i>PHLDB1</i>       | 11  | 117991277       |       |                      |
| 11q24.1  | rs7941030  | <i>UBASH3B</i>      | 11  | 122027585       |       |                      |
| 11q24.2  | rs11220462 | <i>ST3GAL4</i>      | 11  | 125749162       |       |                      |
| 12p13.31 | rs4883201  | <i>PHC1-A2ML1</i>   | 12  | 8973848         |       |                      |
| 12p12.2  | rs7134375  | <i>PDE3A</i>        | 12  | 20365025        |       |                      |
| 12q13.3  | rs11613352 | <i>LRP1</i>         | 12  | 56078847        |       |                      |
| 12q24.11 | rs7134594  | <i>MVK</i>          | 12  | 108484576       |       |                      |
| 12q24.12 | rs11065987 | <i>BRAP</i>         | 12  | 110556807       |       |                      |
| 12q24.31 | rs1169288  | <i>HNFI1A</i>       | 12  | 119901033       |       |                      |
| 12q24.31 | rs4759375  | <i>SBNO1</i>        | 12  | 122362191       |       |                      |
| 12q24.31 | rs4765127  | <i>ZNF664</i>       | 12  | 123026120       |       |                      |
| 12q24.31 | rs838880   | <i>SCARB1</i>       | 12  | 123827546       |       |                      |
| 13q13.1  | rs4942486  | <i>BRCA2</i>        | 13  | 31851388        |       |                      |

| Cyto     | rsID       | Locus Name         | Chr | Position (hg18) | Proxy | Original rsID (GLGC) |
|----------|------------|--------------------|-----|-----------------|-------|----------------------|
| 14q12    | rs2332328  | <i>NYNRIN</i>      | 14  | 23952898        |       |                      |
| 14q32.33 | rs4983559  | <i>ZBTB42-AKT1</i> | 14  | 104348254       |       |                      |
| 15q15.3  | rs8035382  | <i>FRMD5</i>       | 15  | 42031815        | x     | rs292982             |
| 15q22.1  | rs1532085  | <i>LIPC</i>        | 15  | 56470658        |       |                      |
| 15q22.2  | rs2652834  | <i>LACTB</i>       | 15  | 61183920        |       |                      |
| 16p13.11 | rs3198697  | <i>PDXDC1</i>      | 16  | 15037441        |       |                      |
| 16p11.2  | rs11649653 | <i>CTF1</i>        | 16  | 30825988        |       |                      |
| 16q12.2  | rs1121980  | <i>FTO</i>         | 16  | 52366748        |       |                      |
| 16q13    | rs3764261  | <i>CETP</i>        | 16  | 55550825        |       |                      |
| 16q22.1  | rs16942887 | <i>LCAT</i>        | 16  | 66485543        |       |                      |
| 16q22.3  | rs2000999  | <i>HPR</i>         | 16  | 70665594        |       |                      |
| 16q23.2  | rs2925979  | <i>CMIP</i>        | 16  | 80092291        |       |                      |
| 17p13.1  | rs314253   | <i>DLG4</i>        | 17  | 7032374         |       |                      |
| 17q12    | rs881844   | <i>STARD3</i>      | 17  | 35063744        |       |                      |
| 17q21.31 | rs8077889  | <i>MPP3</i>        | 17  | 39233692        |       |                      |
| 17q21.32 | rs7225700  | <i>OSBPL7</i>      | 17  | 42746803        |       |                      |
| 17q24.2  | rs1801689  | <i>APOH-PRXCA</i>  | 17  | 61641042        |       |                      |
| 17q24.2  | rs4148008  | <i>ABCA8</i>       | 17  | 64386889        |       |                      |
| 17q25.3  | rs4082919  | <i>PGS1</i>        | 17  | 73889077        |       |                      |
| 18q21.1  | rs7241918  | <i>LIPG</i>        | 18  | 45414951        |       |                      |
| 18q21.32 | rs12967135 | <i>MC4R</i>        | 18  | 56000003        |       |                      |
| 19p13.2  | rs7248104  | <i>INSR</i>        | 19  | 7175431         |       |                      |
| 19p13.2  | rs7255436  | <i>ANGPTL4</i>     | 19  | 8339196         |       |                      |
| 19p13.2  | rs6511720  | <i>LDLR</i>        | 19  | 11063306        |       |                      |
| 19p13.2  | rs737337   | <i>LOC55908</i>    | 19  | 11208493        |       |                      |
| 19p13.11 | rs10401969 | <i>CILP2</i>       | 19  | 19268718        |       |                      |
| 19q13.11 | rs731839   | <i>PEPD</i>        | 19  | 38590905        |       |                      |
| 19q13.32 | rs4420638  | <i>APOEC1C2</i>    | 19  | 50114786        |       |                      |
| 19q13.33 | rs492602   | <i>FLJ36070</i>    | 19  | 53898229        |       |                      |
| 19q13.33 | rs17695224 | <i>HAS1</i>        | 19  | 57016028        |       |                      |
| 19q13.42 | rs386000   | <i>LILRA3</i>      | 19  | 59484573        |       |                      |
| 20p12.1  | rs364585   | <i>SPTLC3</i>      | 20  | 12910718        |       |                      |
| 20p12.1  | rs2328223  | <i>SNX5</i>        | 20  | 17793921        |       |                      |
| 20q11.22 | rs2277862  | <i>ERGIC3</i>      | 20  | 33616196        |       |                      |
| 20q12    | rs2902940  | <i>MAFB</i>        | 20  | 38524901        |       |                      |
| 20q12    | rs909802   | <i>TOPI</i>        | 20  | 39370229        |       |                      |
| 20q13.12 | rs1800961  | <i>HNF4A</i>       | 20  | 42475778        |       |                      |
| 20q13.12 | rs6065906  | <i>PLTP</i>        | 20  | 43987422        |       |                      |
| 22q11.21 | rs181362   | <i>UBE2L3</i>      | 22  | 20262068        |       |                      |
| 22q12.2  | rs5763662  | <i>MTMR3</i>       | 22  | 28708703        |       |                      |
| 22q12.3  | rs138777   | <i>TOM1</i>        | 22  | 34041098        |       |                      |
| 22q13.1  | rs5756931  | <i>PLA2G6</i>      | 22  | 36875979        |       |                      |
| 22q13.31 | rs4253772  | <i>PPARA</i>       | 22  | 45006267        |       |                      |

Cyto: cytogenic position of each of the SNPs

rsID: SNP name

Chr: chromosome

**Supplemental Table 2b:** List of SNPs used in analysis or proxies from GWAS of statin-induced change in LDL-C. Index variants from candidate loci identified from analysis of rosuvastatin-induced change in LDL-C<sup>1</sup>.

| Cyto     | rsID       | Locus Name     | Chr | Position (hg18) |
|----------|------------|----------------|-----|-----------------|
| 1p32.3   | rs17111584 | <i>PCSK9</i>   | 1   | 55319284        |
| 4q22.1   | rs2199936  | <i>ABCG2</i>   | 4   | 89264355        |
| 6q26     | rs10455872 | <i>LPA</i>     | 6   | 160930108       |
| 12p12.1  | rs12317268 | <i>SLCO1B1</i> | 12  | 21243808        |
| 19p13.2  | rs11672123 | <i>LDLR</i>    | 19  | 11055823        |
| 19q13.32 | rs7412     | <i>APOE</i>    | 19  | 50103919        |

Cyto: cytogenic position of each of the SNPs

rsID: SNP name

Chr: chromosome

**Supplemental Table 2c:** List of all SNPs used in analysis or proxies and associations with circulating lipids<sup>1,2</sup> and statin-induced change in LDL-C<sup>3</sup>.

| Cluster number | rsID       | Locus Name    | Chr | Position (hg18) | Proxy | Lipid associations |       |               |                   |                                |
|----------------|------------|---------------|-----|-----------------|-------|--------------------|-------|---------------|-------------------|--------------------------------|
|                |            |               |     |                 |       | LDL-C              | HDL-C | Triglycerides | Total Cholesterol | Statin Induced Change in LDL-C |
| 1.01           | rs1077514  | ASAP3         | 1   | 23638820        |       |                    |       |               | x                 |                                |
| 1.02           | rs12027135 | LDLRAP1       | 1   | 25648320        |       | x                  |       |               | x                 |                                |
| 1.03           | rs12748152 | PIGV-NROB2    | 1   | 27010980        |       | x                  | x     | x             |                   |                                |
| 1.04           | rs4660293  | PABPC4        | 1   | 39800767        |       |                    | x     |               |                   |                                |
| 1.05           | rs2479409  | PCSK9         | 1   | 55277238        |       | x                  |       |               | x                 |                                |
| 1.06           | rs17111584 | PCSK9 - delta | 1   | 55319284        |       |                    |       |               |                   | x                              |
| 1.07           | rs2131925  | ANGPTL3       | 1   | 62798530        |       | x                  |       | x             | x                 |                                |
| 1.08           | rs7515577  | EVI5          | 1   | 92782026        |       |                    |       |               | x                 |                                |
| 1.09           | rs629301   | SORT1         | 1   | 109619829       |       | x                  |       |               | x                 |                                |
| 1.10           | rs267733   | ANXA9-CERS2   | 1   | 149225460       |       | x                  |       |               |                   |                                |
| 1.11           | rs12145743 | HDGF-PMVK     | 1   | 154967275       |       |                    | x     |               |                   |                                |
| 1.12           | rs4650994  | ANGPTL1       | 1   | 176781935       |       |                    | x     |               |                   |                                |
| 1.13           | rs1689800  | ZNF648        | 1   | 180435508       |       |                    | x     |               |                   |                                |
| 1.14           | rs2807834  | MOSC1         | 1   | 219037216       |       | x                  |       |               | x                 |                                |
| 1.15           | rs4846914  | GALNT2        | 1   | 228362314       |       |                    | x     | x             |                   |                                |
| 1.16           | rs514230   | IRF2BP2       | 1   | 232925220       |       | x                  |       |               | x                 |                                |
| 2.01           | rs1367117  | APOB          | 2   | 21117405        |       | x                  | x     | x             | x                 |                                |
| 2.02           | rs1260326  | GCKR          | 2   | 27584444        |       |                    |       | x             | x                 |                                |
| 2.03           | rs4299376  | ABCG5-8       | 2   | 43926080        |       | x                  |       |               | x                 |                                |
| 2.04           | rs2710642  | EHBPI         | 2   | 63003061        |       | x                  |       |               |                   |                                |
| 2.05           | rs10490626 | INSIG2        | 2   | 118552311       |       | x                  |       |               | x                 |                                |
| 2.06           | rs2030746  | LOC84931      | 2   | 121025958       |       | x                  |       |               | x                 |                                |
| 2.07           | rs6759321  | RABGAP1       | 2   | 136039146       |       |                    |       |               | x                 |                                |
| 2.08           | rs10195252 | COBLL1        | 2   | 165221337       |       |                    | x     |               | x                 |                                |
| 2.09           | rs2287623  | ABCB11        | 2   | 169538401       |       |                    |       |               | x                 |                                |
| 2.10           | rs11694172 | FAM117B       | 2   | 203240549       |       |                    |       |               | x                 |                                |
| none           | rs1047891  | CPS1          | 2   | 211248752       | none  |                    | x     |               |                   |                                |
| 2.11           | rs1250229  | FNI           | 2   | 216012629       |       | x                  |       |               |                   |                                |
| 2.12           | rs2943645  | IRS1          | 2   | 226807424       |       |                    | x     | x             |                   |                                |
| 2.13           | rs11563251 | UGT1A1        | 2   | 234344123       |       | x                  |       |               | x                 |                                |
| 3.01           | rs2606736  | ATG7          | 3   | 11375249        |       |                    | x     |               |                   |                                |
| 3.02           | rs2290159  | RAF1          | 3   | 12603920        |       |                    |       |               | x                 |                                |
| 3.03           | rs7640978  | CMTM6         | 3   | 32508014        |       | x                  |       |               | x                 |                                |
| 3.04           | rs2290547  | SETD2         | 3   | 47036187        |       |                    | x     |               |                   |                                |
| 3.05           | rs2013208  | RBM5          | 3   | 50104403        |       |                    | x     |               |                   |                                |
| 3.06           | rs13326165 | STAB1         | 3   | 52507158        |       |                    | x     |               |                   |                                |
| 3.07           | rs13315871 | PXK           | 3   | 58356327        |       |                    |       |               | x                 |                                |
| 3.08           | rs6805251  | GSK3B         | 3   | 121043296       |       |                    | x     |               |                   |                                |
| 3.09           | rs17404153 | ACAD11        | 3   | 133645890       |       | x                  | x     |               |                   |                                |



| Cluster number | rsID       | Locus Name           | Chr | Position (hg18) | Proxy | Lipid associations |       |               |                   |                                |
|----------------|------------|----------------------|-----|-----------------|-------|--------------------|-------|---------------|-------------------|--------------------------------|
|                |            |                      |     |                 |       | LDL-C              | HDL-C | Triglycerides | Total Cholesterol | Statin Induced Change in LDL-C |
| 3.10           | rs645040   | <i>MSL2L1</i>        | 3   | 137409312       |       |                    |       | x             |                   |                                |
| 4.01           | rs6831256  | <i>LRPAP1</i>        | 4   | 3442937         |       | x                  |       | x             | x                 |                                |
| 4.02           | rs10019888 | <i>C4orf52</i>       | 4   | 25672088        |       |                    | x     |               |                   |                                |
| 4.03           | rs442177   | <i>KLHL8</i>         | 4   | 88249285        |       |                    |       | x             |                   |                                |
| 4.04           | rs2199936  | <i>ABCG2 - delta</i> | 4   | 89264355        |       |                    |       |               |                   | x                              |
| 4.05           | rs3822072  | <i>FAM13A1</i>       | 4   | 89960292        |       |                    |       | x             |                   |                                |
| 4.06           | rs2602836  | <i>ADH5</i>          | 4   | 100233828       |       |                    |       | x             |                   |                                |
| 4.07           | rs13107325 | <i>SLC39A8</i>       | 4   | 103407732       |       |                    |       | x             |                   |                                |
| 5.01           | rs6450176  | <i>ARL15</i>         | 5   | 53333782        |       |                    |       | x             |                   |                                |
| 5.02           | rs9686661  | <i>MAP3K1</i>        | 5   | 55897543        |       |                    |       |               | x                 |                                |
| 5.03           | rs12916    | <i>HMGCR</i>         | 5   | 74692295        |       | x                  |       |               | x                 |                                |
| 5.04           | rs4530754  | <i>CSNK1G3</i>       | 5   | 122883315       |       | x                  |       |               | x                 |                                |
| 5.05           | rs6882076  | <i>TIMD4</i>         | 5   | 156322875       |       | x                  |       | x             | x                 |                                |
| 6.01           | rs3757354  | <i>MYLIP</i>         | 6   | 16235386        |       | x                  |       |               | x                 |                                |
| 6.02           | rs1800562  | <i>HFE</i>           | 6   | 26201120        |       | x                  |       |               | x                 |                                |
| 6.03           | rs3177928  | <i>HLA</i>           | 6   | 32520413        |       | x                  |       | x             | x                 |                                |
| 6.04           | rs2814982  | <i>C6orf106</i>      | 6   | 34654538        |       |                    |       | x             | x                 |                                |
| 6.05           | rs2758886  | <i>KCNK17</i>        | 6   | 39358815        |       |                    |       |               | x                 |                                |
| 6.06           | rs998584   | <i>VEGFA</i>         | 6   | 43865874        |       |                    |       | x             |                   |                                |
| 6.07           | rs9488822  | <i>FRK</i>           | 6   | 116419586       |       | x                  |       |               | x                 |                                |
| 6.08           | rs1936800  | <i>RSPO3</i>         | 6   | 127477757       |       |                    |       | x             |                   |                                |
| 6.09           | rs9376090  | <i>HBS1L</i>         | 6   | 135452921       |       |                    |       |               | x                 |                                |
| 6.10           | rs605066   | <i>CITED2</i>        | 6   | 139871359       |       |                    |       | x             |                   |                                |
| 6.11           | rs1564348  | <i>LPA</i>           | 6   | 160498850       |       | x                  |       | x             | x                 |                                |
| 6.12           | rs10455872 | <i>LPA - delta</i>   | 6   | 160930108       |       |                    |       |               |                   | x                              |
| 7.01           | rs1997243  | <i>GPR146</i>        | 7   | 1050303         |       |                    |       |               | x                 |                                |
| 7.02           | rs702485   | <i>DAGLB</i>         | 7   | 6415797         |       |                    |       |               |                   |                                |
| 7.03           | rs4142995  | <i>SNX13</i>         | 7   | 17885783        |       |                    |       | x             |                   |                                |
| 7.04           | rs2285942  | <i>DNAH11</i>        | 7   | 21549442        |       | x                  |       |               | x                 |                                |
| 7.05           | rs4722551  | <i>MIR148A</i>       | 7   | 25958351        |       | x                  |       | x             | x                 |                                |
| 7.06           | rs2072183  | <i>NPC1L1</i>        | 7   | 44545705        |       | x                  |       |               | x                 |                                |
| 7.07           | rs4917014  | <i>IKZF1</i>         | 7   | 50276409        |       |                    |       |               |                   |                                |
| none           | rs13238203 | <i>TYWIB</i>         | 7   | 71767603        | none  |                    |       | x             |                   |                                |
| 7.08           | rs7811265  | <i>MLXIPL</i>        | 7   | 72572446        |       |                    |       | x             | x                 |                                |
| 7.09           | rs38855    | <i>MET</i>           | 7   | 116145280       |       |                    |       |               | x                 |                                |
| 7.10           | rs4731702  | <i>KLF14</i>         | 7   | 130083924       |       |                    |       | x             |                   |                                |
| 7.11           | rs17173637 | <i>TMEM176A</i>      | 7   | 150160382       |       |                    |       | x             |                   |                                |
| 8.01           | rs9987289  | <i>PPP1R3B</i>       | 8   | 9220768         |       | x                  |       | x             | x                 |                                |
| 8.02           | rs11776767 | <i>PINX1</i>         | 8   | 10721339        |       |                    |       | x             |                   |                                |
| 8.03           | rs1495743  | <i>NAT2</i>          | 8   | 18317580        |       |                    |       | x             | x                 |                                |
| 8.04           | rs12678919 | <i>LPL</i>           | 8   | 19888502        |       |                    |       | x             |                   |                                |
| 8.05           | rs10102164 | <i>SOX17</i>         | 8   | 55584167        |       | x                  |       |               | x                 |                                |
| 8.06           | rs1030431  | <i>CYP7A1</i>        | 8   | 59474251        |       | x                  |       |               | x                 |                                |
| 8.07           | rs2293889  | <i>TRPS1</i>         | 8   | 116668374       |       |                    |       | x             | x                 |                                |

| Cluster number | rsID       | Locus Name             | Chr | Position (hg18) | Proxy    | Lipid associations |       |               |                   |                                |
|----------------|------------|------------------------|-----|-----------------|----------|--------------------|-------|---------------|-------------------|--------------------------------|
|                |            |                        |     |                 |          | LDL-C              | HDL-C | Triglycerides | Total Cholesterol | Statin Induced Change in LDL-C |
| 8.08           | rs2954029  | <i>TRIB1</i>           | 8   | 126560154       |          | x                  | x     | x             | x                 |                                |
| 8.09           | rs11136341 | <i>PLEC1</i>           | 8   | 145115531       |          | x                  |       |               | x                 |                                |
| 9.01           | rs3780181  | <i>VLDLR</i>           | 9   | 2630759         |          | x                  |       |               | x                 |                                |
| 9.02           | rs643531   | <i>TTC39B</i>          | 9   | 15286034        |          |                    | x     |               | x                 |                                |
| 9.03           | rs1883025  | <i>ABCA1</i>           | 9   | 106704122       |          |                    | x     |               | x                 |                                |
| 9.04           | rs649129   | <i>ABO</i>             | 9   | 135144125       |          | x                  |       |               | x                 |                                |
| 10.01          | rs1832007  | <i>AKR1C4</i>          | 10  | 5244847         |          |                    |       | x             |                   |                                |
| 10.02          | rs10904908 | <i>TRDMT1</i>          | 10  | 17300296        |          |                    |       |               | x                 |                                |
| 10.03          | rs970548   | <i>MARCH8-ALOX5</i>    | 10  | 45333283        |          |                    | x     |               | x                 |                                |
| 10.04          | rs10761731 | <i>JMJD1C</i>          | 10  | 64697616        |          |                    |       | x             |                   |                                |
| 10.05          | rs2068888  | <i>CYP26A1</i>         | 10  | 94829632        |          |                    |       | x             |                   |                                |
| 10.06          | rs2255141  | <i>GPAM</i>            | 10  | 113923876       |          | x                  |       |               | x                 |                                |
| 11.01          | rs2923084  | <i>AMPD3</i>           | 11  | 10345358        |          |                    | x     |               |                   |                                |
| 11.02          | rs10832963 | <i>SPTY2D1</i>         | 11  | 18620817        |          |                    |       |               | x                 |                                |
| 11.03          | rs3136441  | <i>LRP4</i>            | 11  | 46699823        |          |                    | x     |               |                   |                                |
| 11.04          | rs11246602 | <i>OR4C46</i>          | 11  | 51368666        |          |                    | x     |               |                   |                                |
| 11.05          | rs174546   | <i>FADS123</i>         | 11  | 61326406        |          | x                  | x     | x             | x                 |                                |
| 11.06          | rs12801636 | <i>KAT5</i>            | 11  | 65147893        |          |                    | x     |               |                   |                                |
| 11.07          | rs499974   | <i>MOGAT2-DGAT2</i>    | 11  | 75132669        |          |                    | x     |               |                   |                                |
| 11.08          | rs964184   | <i>APOA1C3A4A5</i>     | 11  | 116154127       |          | x                  | x     | x             | x                 |                                |
| 11.09          | rs11603023 | <i>PHLDB1</i>          | 11  | 117991277       |          |                    |       |               | x                 |                                |
| 11.10          | rs7941030  | <i>UBASH3B</i>         | 11  | 122027585       |          |                    | x     |               | x                 |                                |
| 11.11          | rs11220462 | <i>ST3GAL4</i>         | 11  | 125749162       |          | x                  |       |               | x                 |                                |
| 12.01          | rs4883201  | <i>PHC1-A2ML1</i>      | 12  | 8973848         |          |                    |       |               | x                 |                                |
| 12.02          | rs7134375  | <i>PDE3A</i>           | 12  | 20365025        |          |                    | x     |               |                   |                                |
| 12.03          | rs12317268 | <i>SLCO1B1 - delta</i> | 12  | 21243808        |          |                    |       |               |                   | x                              |
| 12.04          | rs11613352 | <i>LRP1</i>            | 12  | 56078847        |          |                    |       | x             |                   |                                |
| 12.05          | rs7134594  | <i>MVK</i>             | 12  | 108484576       |          |                    |       | x             |                   |                                |
| 12.06          | rs11065987 | <i>BRAP</i>            | 12  | 110556807       |          | x                  |       |               | x                 |                                |
| 12.07          | rs1169288  | <i>HNF1A</i>           | 12  | 119901033       |          | x                  |       |               | x                 |                                |
| 12.08          | rs4759375  | <i>SBN01</i>           | 12  | 122362191       |          |                    | x     |               |                   |                                |
| 12.09          | rs4765127  | <i>ZNF664</i>          | 12  | 123026120       |          |                    |       | x             |                   |                                |
| 12.10          | rs838880   | <i>SCARB1</i>          | 12  | 123827546       |          |                    | x     |               |                   |                                |
| 13.01          | rs4942486  | <i>BRCA2</i>           | 13  | 31851388        |          | x                  |       |               |                   |                                |
| 14.01          | rs2332328  | <i>NYNRIN</i>          | 14  | 23952898        |          | x                  |       |               |                   |                                |
| 14.02          | rs4983559  | <i>ZBTB42-AKT1</i>     | 14  | 104348254       |          |                    |       |               |                   |                                |
| none           | rs2412710  | <i>CAPN3</i>           | 15  | 40471079        | none     |                    |       | x             |                   |                                |
| 15.01          | rs8035382  | <i>FRMD5</i>           | 15  | 42031815        | rs292982 |                    |       | x             |                   |                                |
| 15.02          | rs1532085  | <i>LIPC</i>            | 15  | 56470658        |          |                    | x     |               | x                 |                                |
| 15.03          | rs2652834  | <i>LACTB</i>           | 15  | 61183920        |          |                    |       | x             |                   |                                |
| 16.01          | rs3198697  | <i>PDXDC1</i>          | 16  | 15037441        |          |                    |       | x             |                   |                                |
| 16.02          | rs11649653 | <i>CTF1</i>            | 16  | 30825988        |          |                    |       | x             |                   |                                |
| 16.03          | rs1121980  | <i>FTO</i>             | 16  | 52366748        |          |                    | x     |               |                   |                                |
| 16.04          | rs3764261  | <i>CETP</i>            | 16  | 55550825        |          | x                  | x     | x             | x                 |                                |

| Cluster number | rsID       | Locus Name          | Chr | Position (hg18) | Proxy | Lipid associations |       |               |                   |                                |
|----------------|------------|---------------------|-----|-----------------|-------|--------------------|-------|---------------|-------------------|--------------------------------|
|                |            |                     |     |                 |       | LDL-C              | HDL-C | Triglycerides | Total Cholesterol | Statin Induced Change in LDL-C |
| 16.05          | rs16942887 | <i>LCAT</i>         | 16  | 66485543        |       |                    | x     |               |                   |                                |
| 16.06          | rs2000999  | <i>HPR</i>          | 16  | 70665594        |       | x                  |       |               | x                 |                                |
| 16.07          | rs2925979  | <i>CMIP</i>         | 16  | 80092291        |       |                    | x     |               |                   |                                |
| 17.01          | rs314253   | <i>DLG4</i>         | 17  | 7032374         |       | x                  |       |               | x                 |                                |
| 17.02          | rs881844   | <i>STARD3</i>       | 17  | 35063744        |       |                    | x     |               |                   |                                |
| 17.03          | rs8077889  | <i>MPP3</i>         | 17  | 39233692        |       |                    |       | x             |                   |                                |
| 17.04          | rs7225700  | <i>OSBPL7</i>       | 17  | 42746803        |       | x                  |       |               | x                 |                                |
| 17.05          | rs1801689  | <i>APOH-PRXCA</i>   | 17  | 61641042        |       | x                  |       |               |                   |                                |
| 17.06          | rs4148008  | <i>ABCA8</i>        | 17  | 64386889        |       |                    | x     |               |                   |                                |
| 17.07          | rs4082919  | <i>PGS1</i>         | 17  | 73889077        |       |                    | x     |               |                   |                                |
| 18.01          | rs7241918  | <i>LIPG</i>         | 18  | 45414951        |       |                    | x     |               | x                 |                                |
| 18.02          | rs12967135 | <i>MC4R</i>         | 18  | 56000003        |       |                    | x     |               |                   |                                |
| 19.01          | rs7248104  | <i>INSR</i>         | 19  | 7175431         |       |                    |       | x             |                   |                                |
| 19.02          | rs7255436  | <i>ANGPTL4</i>      | 19  | 8339196         |       |                    | x     |               |                   |                                |
| 19.03          | rs11672123 | <i>LDLR - delta</i> | 19  | 11055823        |       |                    |       |               |                   | x                              |
| 19.04          | rs6511720  | <i>LDLR</i>         | 19  | 11063306        |       | x                  |       |               | x                 |                                |
| 19.05          | rs737337   | <i>LOC55908</i>     | 19  | 11208493        |       |                    | x     |               |                   |                                |
| 19.06          | rs10401969 | <i>CILP2</i>        | 19  | 19268718        |       | x                  |       | x             | x                 |                                |
| 19.07          | rs731839   | <i>PEPD</i>         | 19  | 38590905        |       |                    | x     | x             |                   |                                |
| 19.08          | rs7412     | <i>APOE - delta</i> | 19  | 50103919        |       |                    |       |               |                   | x                              |
| 19.09          | rs4420638  | <i>APOEC1C2</i>     | 19  | 50114786        |       | x                  | x     | x             | x                 |                                |
| 19.10          | rs492602   | <i>FLJ36070</i>     | 19  | 53898229        |       |                    |       |               | x                 |                                |
| 19.11          | rs17695224 | <i>HAS1</i>         | 19  | 57016028        |       |                    | x     |               |                   |                                |
| 19.12          | rs386000   | <i>LILRA3</i>       | 19  | 59484573        |       |                    | x     |               |                   |                                |
| 20.01          | rs364585   | <i>SPTLC3</i>       | 20  | 12910718        |       | x                  |       |               |                   |                                |
| 20.02          | rs2328223  | <i>SNX5</i>         | 20  | 17793921        |       |                    | x     |               |                   |                                |
| 20.03          | rs2277862  | <i>ERGIC3</i>       | 20  | 33616196        |       |                    |       |               | x                 |                                |
| 20.04          | rs2902940  | <i>MAFB</i>         | 20  | 38524901        |       | x                  |       |               | x                 |                                |
| 20.05          | rs909802   | <i>TOP1</i>         | 20  | 39370229        |       | x                  |       |               | x                 |                                |
| 20.06          | rs1800961  | <i>HNF4A</i>        | 20  | 42475778        |       |                    | x     |               | x                 |                                |
| 20.07          | rs6065906  | <i>PLTP</i>         | 20  | 43987422        |       |                    | x     | x             |                   |                                |
| 22.01          | rs181362   | <i>UBE2L3</i>       | 22  | 20262068        |       |                    |       | x             |                   |                                |
| 22.02          | rs5763662  | <i>MTMR3</i>        | 22  | 28708703        |       | x                  |       |               |                   |                                |
| 22.03          | rs138777   | <i>TOM1</i>         | 22  | 34041098        |       |                    |       |               | x                 |                                |
| 22.04          | rs5756931  | <i>PLA2G6</i>       | 22  | 36875979        |       |                    |       | x             |                   |                                |
| 22.05          | rs4253772  | <i>PPARA</i>        | 22  | 45006267        |       | x                  |       |               | x                 |                                |

Cluster number: unique numeric identifier for each of the SNPs in the analysis (none indicates the SNP was not genotyped nor imputed in the study population)

Cyto: cytogenic position of each of the SNPs

rsID: SNP name

MAF: minor allele frequency

**Supplemental Table 3:** Clinical characteristics of the JUPITER study participants of European ancestry who provided informed consent for genetic analysis and provided baseline and one-year (n=7,046) blood samples by drug-allocation.

|                        |              | ALL                      | Rosuvastatin             | Placebo                  |
|------------------------|--------------|--------------------------|--------------------------|--------------------------|
| N                      |              | 7046                     | 3534                     | 3512                     |
| Age, yrs               | median (IQR) | 66.0 (60.0-71.0)         | 66.0 (60.0-71.0)         | 66.0 (60.0-71.0)         |
| Gender, female         | N (%)        | 2815 (32%)               | 1428 (33%)               | 1387 (32%)               |
| BMI, kg/m <sup>2</sup> | median (IQR) | 28.6 (25.7-32.11)        | 28.6 (25.7-32.2)         | 28.7 (25.6-32.1)         |
| Hypertension           | N (%)        |                          |                          |                          |
| Current Smoker         | N (%)        | 1158 (13%)               | 583 (13%)                | 575 (13%)                |
| Baseline               |              |                          |                          |                          |
| LDL-C                  | mg/dL        | 110.0 (97.0 - 120.0)     | 110.0 (96.0 - 120.0)     | 110.0 (97.0 - 120.0)     |
| non-HDL-C              | mg/dL        | 135.0 (121.0 - 147.0)    | 135.0 (121.0 - 147.0)    | 135.0 (121.0 - 147.0)    |
| apo B                  | mg/dL        | 109.0 (97.0 - 121.0)     | 109.0 (96.0 - 122.0)     | 109.0 (97.0 - 121.0)     |
| LDL-P                  | nmol/L       | 1268.0 (1090.0 - 1457.0) | 1260.0 (1092.0 - 1458.0) | 1276.0 (1090.0 - 1456.0) |
| LDL-size               | nm           | 21.0 (20.6 - 21.4)       | 21.0 (20.5 - 21.4)       | 21.0 (20.6 - 21.4)       |
| Change                 |              |                          |                          |                          |
| LDL-C                  | mg/dL        | -                        | -54.0 (-66.0 - -41.0)    | 3.0 (-7.0 - 15.0)        |
| non-HDL-C              | mg/dL        | -                        | -59.0 (-73.0 - -44.0)    | 4.0 (-8.0 - 16.0)        |
| apo B                  | mg/dL        | -                        | -43.0 (-54.0 - -32.0)    | -2.0 (-12.0 - 7.0)       |
| LDL-P                  | nmol/L       | -                        | -528.0 (-692.8 - -356.0) | -47.5 (-181.0 - 90.8)    |
| LDL-size               | nm           | -                        | -0.4 (-0.8 - 0.0)        | 0.0 (-0.3 - 0.3)         |

IQR: interquartile range

**Supplemental Table 4:** Correlation matrix for baseline and statin-response measures. Spearman correlation matrix ( $r^2$ ) for all baseline, absolute change ( $\Delta$ ) and percentage change ( $\Delta \%$ ) measures among up to 3,534 statin-allocated participants in the JUPITER study.

|           |             | LDL-C    |          |             | non-HDL-C |          |             | apo B    |          |             | LDL-P    |          |             | LDL-size |          |             |
|-----------|-------------|----------|----------|-------------|-----------|----------|-------------|----------|----------|-------------|----------|----------|-------------|----------|----------|-------------|
|           |             | baseline | $\Delta$ | $\Delta \%$ | baseline  | $\Delta$ | $\Delta \%$ | baseline | $\Delta$ | $\Delta \%$ | baseline | $\Delta$ | $\Delta \%$ | baseline | $\Delta$ | $\Delta \%$ |
| LDL-C     | baseline    |          |          |             |           |          |             |          |          |             |          |          |             |          |          |             |
|           | $\Delta$    | -0.52    |          |             |           |          |             |          |          |             |          |          |             |          |          |             |
|           | $\Delta \%$ | -0.11    | 0.86     |             |           |          |             |          |          |             |          |          |             |          |          |             |
| non-HDL-C | baseline    | 0.74     | -0.44    | -0.14       |           |          |             |          |          |             |          |          |             |          |          |             |
|           | $\Delta$    | -0.44    | 0.88     | 0.78        | -0.55     |          |             |          |          |             |          |          |             |          |          |             |
|           | $\Delta \%$ | -0.16    | 0.82     | 0.89        | -0.18     | 0.88     |             |          |          |             |          |          |             |          |          |             |
| apo B     | baseline    | 0.51     | -0.21    | 0.03        | 0.70      | -0.28    | 0.02        |          |          |             |          |          |             |          |          |             |
|           | $\Delta$    | -0.29    | 0.64     | 0.57        | -0.38     | 0.70     | 0.61        | -0.60    |          |             |          |          |             |          |          |             |
|           | $\Delta \%$ | -0.09    | 0.66     | 0.73        | -0.12     | 0.70     | 0.78        | -0.24    | 0.89     |             |          |          |             |          |          |             |
| LDL-P     | baseline    | 0.41     | -0.18    | 0.01        | 0.61      | -0.26    | 0.01        | 0.79     | -0.47    | -0.17       |          |          |             |          |          |             |
|           | $\Delta$    | -0.18    | 0.50     | 0.47        | -0.33     | 0.56     | 0.47        | -0.45    | 0.71     | 0.61        | -0.64    |          |             |          |          |             |
|           | $\Delta \%$ | -0.01    | 0.52     | 0.61        | -0.07     | 0.54     | 0.61        | -0.14    | 0.61     | 0.68        | -0.26    | 0.88     |             |          |          |             |
| LDL-size  | baseline    | 0.15     | -0.03    | 0.07        | -0.20     | 0.09     | 0.01        | -0.20    | 0.11     | 0.04        | -0.31    | 0.21     | 0.10        |          |          |             |
|           | $\Delta$    | -0.06    | 0.17     | 0.17        | 0.13      | 0.07     | 0.15        | 0.13     | 0.04     | 0.12        | 0.19     | -0.08    | -0.02       | -0.61    |          |             |
|           | $\Delta \%$ | -0.06    | 0.17     | 0.17        | 0.12      | 0.07     | 0.15        | 0.13     | 0.05     | 0.12        | 0.18     | -0.08    | -0.02       | -0.58    | 1.00     |             |

**Supplemental Table 5:** Association results for index variants in each candidate region tested and association with baseline levels of LDL-C, non-HDL-C, apo B, LDL-P and LDL-size among rosuvastatin- and placebo-allocated participants.

| Cluster number | rsID       | Locus Name    | Chr | Position (hg18) | LDL-C baseline |          | non-HDL-C baseline |          |          | Apo B baseline |          |          | LDL-P baseline |          | LDL-size baseline |                |          |          |                |
|----------------|------------|---------------|-----|-----------------|----------------|----------|--------------------|----------|----------|----------------|----------|----------|----------------|----------|-------------------|----------------|----------|----------|----------------|
|                |            |               |     |                 | Beta (q)       | P-value  | R <sup>2</sup>     | Beta (q) | P-value  | R <sup>2</sup> | Beta (q) | P-value  | R <sup>2</sup> | Beta (q) | P-value           | R <sup>2</sup> | Beta (q) | P-value  | R <sup>2</sup> |
| 1.01           | rs1077514  | ASAP3         | 1   | 23638820        | 2.2E-02        | 3.6E-01  | 1.2E-04            | 3.5E-02  | 1.5E-01  | 2.9E-04        | 3.2E-02  | 1.9E-01  | 2.5E-04        | 2.9E-02  | 2.6E-01           | 2.1E-04        | 6.9E-03  | 7.8E-01  | 1.3E-05        |
| 1.02           | rs12027135 | LDLRAP1       | 1   | 25648320        | -2.6E-02       | 1.2E-01  | 3.5E-04            | -2.6E-02 | 1.2E-01  | 3.5E-04        | -2.9E-03 | 8.6E-01  | 4.2E-06        | -1.4E-02 | 4.4E-01           | 9.9E-05        | -2.4E-04 | 9.9E-01  | 3.1E-08        |
| 1.03           | rs12748152 | PIGV-NROB2    | 1   | 27010980        | -3.3E-02       | 3.0E-01  | 1.5E-04            | 1.2E-02  | 7.1E-01  | 2.0E-05        | 2.3E-02  | 4.8E-01  | 7.0E-05        | 4.9E-02  | 1.6E-01           | 3.4E-04        | 4.6E-02  | 1.7E-01  | 3.2E-04        |
| 1.04           | rs4660293  | PABPC4        | 1   | 39800767        | -2.4E-02       | 2.3E-01  | 2.1E-04            | 9.3E-06  | 1.0E+00  | 3.2E-11        | 4.6E-03  | 8.2E-01  | 7.7E-06        | 5.8E-03  | 7.8E-01           | 1.3E-05        | -4.6E-03 | 8.2E-01  | 8.3E-06        |
| 1.05           | rs2479409  | PCSK9         | 1   | 55277238        | 1.3E-02        | 4.7E-01  | 7.3E-05            | 1.1E-02  | 5.4E-01  | 5.2E-05        | -1.2E-02 | 4.9E-01  | 6.8E-05        | -2.9E-02 | 1.2E-01           | 4.0E-04        | 1.4E-02  | 4.7E-01  | 9.0E-05        |
| 1.06           | rs17111584 | PCSK9 - delta | 1   | 55319284        | -6.9E-02       | 8.3E-02  | 4.3E-04            | -7.8E-02 | 5.0E-02  | 5.4E-04        | -8.7E-02 | 3.1E-02  | 6.6E-04        | -1.6E-02 | 7.0E-01           | 2.5E-05        | 5.6E-02  | 1.8E-01  | 3.1E-04        |
| 1.07           | rs2131925  | ANGPTL3       | 1   | 62798530        | -3.2E-02       | 6.4E-02  | 4.9E-04            | -8.1E-02 | 2.8E-06* | 3.1E-03        | -6.6E-02 | 1.7E-04+ | 2.0E-03        | -4.1E-02 | 2.7E-02           | 8.2E-04        | 4.1E-02  | 2.4E-02  | 8.6E-04        |
| 1.08           | rs7515577  | EVIS          | 1   | 92782026        | -4.4E-02       | 2.9E-02  | 6.8E-04            | -4.6E-02 | 2.3E-02  | 7.4E-04        | -3.9E-02 | 6.0E-02  | 5.1E-04        | -1.6E-02 | 4.5E-01           | 9.4E-05        | 2.8E-03  | 9.0E-01  | 2.9E-06        |
| 1.09           | rs629301   | SORT1         | 1   | 109619829       | -1.0E-01       | 6.8E-08* | 4.1E-03            | -4.4E-02 | 2.0E-02  | 7.7E-04        | -9.2E-02 | 1.2E-06* | 3.4E-03        | -4.3E-02 | 3.6E-02           | 7.4E-04        | -3.0E-02 | 1.4E-01  | 3.8E-04        |
| 1.10           | rs267733   | ANXA9-CERS2   | 1   | 149225460       | 9.9E-03        | 6.6E-01  | 2.7E-05            | 1.1E-03  | 9.6E-01  | 3.4E-07        | -1.5E-02 | 5.1E-01  | 6.0E-05        | 1.3E-03  | 9.6E-01           | 4.8E-07        | 3.1E-02  | 1.9E-01  | 2.9E-04        |
| 1.11           | rs12145743 | HDGF-PMVK     | 1   | 154967275       | 2.0E-02        | 2.5E-01  | 1.9E-04            | 8.7E-03  | 6.2E-01  | 3.5E-05        | -7.1E-03 | 6.9E-01  | 2.3E-05        | -2.9E-05 | 1.0E+00           | 4.1E-10        | 3.0E-03  | 8.7E-01  | 4.6E-06        |
| 1.12           | rs4650994  | ANGPTL1       | 1   | 176781935       | -1.1E-02       | 5.0E-01  | 6.4E-05            | -5.0E-04 | 9.8E-01  | 1.3E-07        | 1.7E-02  | 3.1E-01  | 1.5E-04        | 1.5E-02  | 4.0E-01           | 1.2E-04        | -5.2E-03 | 7.7E-01  | 1.5E-05        |
| 1.13           | rs1689800  | ZNF648        | 1   | 180435508       | 1.4E-02        | 4.0E-01  | 9.9E-05            | 1.5E-02  | 3.7E-01  | 1.1E-04        | 2.3E-02  | 1.9E-01  | 2.5E-04        | 1.9E-02  | 3.1E-01           | 1.8E-04        | -9.1E-03 | 6.2E-01  | 4.3E-05        |
| 1.14           | rs2807834  | MOSCI         | 1   | 219037216       | -4.9E-02       | 6.1E-03  | 1.1E-05            | 1.2E-03  | 9.5E-01  | 6.5E-07        | 1.0E-02  | 5.7E-01  | 4.5E-05        | 1.1E-02  | 5.6E-01           | 5.6E-05        | -3.0E-02 | 1.1E-01  | 4.3E-04        |
| 1.15           | rs4846914  | GALNT2        | 1   | 228362314       | -2.4E-03       | 8.9E-01  | 2.7E-06            | 2.3E-02  | 1.8E-01  | 2.5E-04        | 2.8E-02  | 1.1E-01  | 3.7E-04        | 3.6E-02  | 5.3E-02           | 6.3E-04        | -5.7E-02 | 1.7E-03  | 1.7E-03        |
| 1.16           | rs514230   | IRF2BP2       | 1   | 232925220       | -1.5E-02       | 3.8E-01  | 1.1E-04            | -3.9E-02 | 1.9E-02  | 7.9E-04        | -2.5E-02 | 1.3E-01  | 3.2E-04        | -5.1E-03 | 7.7E-01           | 1.4E-05        | 3.4E-02  | 5.4E-02  | 6.2E-04        |
| 2.01           | rs1367117  | APOB          | 2   | 21117405        | 2.5E-02        | 1.7E-01  | 2.7E-04            | 2.4E-02  | 1.8E-01  | 2.5E-04        | 3.2E-02  | 8.5E-02  | 4.2E-04        | -3.8E-02 | 5.4E-02           | 6.2E-04        | 1.1E-02  | 5.7E-01  | 5.4E-05        |
| 2.02           | rs1260326  | GCKR          | 2   | 27584444        | -1.1E-02       | 5.1E-01  | 6.2E-05            | 1.2E-01  | 5.3E-12* | 6.7E-03        | 9.5E-02  | 2.4E-08* | 4.4E-03        | 7.8E-02  | 1.8E-05*          | 3.1E-03        | -7.4E-02 | 2.8E-05* | 2.9E-03        |
| 2.03           | rs4299376  | ABCG5-8       | 2   | 43926080        | 1.6E-02        | 3.9E-01  | 1.1E-04            | 1.2E-02  | 5.1E-01  | 6.1E-05        | 1.9E-02  | 3.0E-01  | 1.6E-04        | -8.0E-03 | 6.8E-01           | 2.8E-05        | 4.8E-02  | 1.2E-02  | 1.1E-03        |
| 2.04           | rs2710642  | EHBP1         | 2   | 63003061        | -1.2E-02       | 4.8E-01  | 7.0E-05            | -3.0E-03 | 8.7E-01  | 4.1E-06        | -1.0E-02 | 5.7E-01  | 4.7E-05        | 3.7E-03  | 8.4E-01           | 6.4E-06        | 1.9E-02  | 3.1E-01  | 1.8E-04        |
| 2.05           | rs10490626 | INSIG2        | 2   | 118552311       | -3.3E-02       | 2.6E-01  | 1.8E-04            | 1.0E-02  | 7.3E-01  | 1.6E-05        | 9.3E-03  | 7.5E-01  | 1.4E-05        | -4.3E-03 | 8.9E-01           | 3.0E-06        | -4.5E-02 | 1.5E-01  | 3.6E-04        |
| 2.06           | rs2030746  | LOC84931      | 2   | 121025958       | 3.0E-02        | 8.1E-02  | 4.3E-04            | 3.6E-02  | 3.4E-02  | 6.4E-04        | 1.7E-02  | 3.1E-01  | 1.5E-04        | 1.8E-02  | 3.3E-01           | 1.6E-04        | 2.5E-02  | 1.6E-01  | 3.4E-04        |
| 2.07           | rs6759321  | RABGAP1       | 2   | 136039146       | -5.6E-03       | 7.6E-01  | 1.3E-05            | 1.7E-02  | 3.5E-01  | 1.2E-04        | 1.5E-02  | 4.0E-01  | 1.0E-04        | -8.5E-03 | 6.7E-01           | 3.1E-05        | -4.4E-03 | 8.2E-01  | 8.4E-06        |
| 2.08           | rs10195252 | COBLL1        | 2   | 165221337       | -2.4E-02       | 1.6E-01  | 2.9E-04            | -4.0E-02 | 1.9E-02  | 7.8E-04        | -2.9E-02 | 9.7E-02  | 3.9E-04        | -3.2E-02 | 7.8E-02           | 5.2E-04        | 3.7E-02  | 3.9E-02  | 7.2E-04        |
| 2.09           | rs2287623  | ABCB11        | 2   | 169538401       | -7.2E-03       | 6.7E-01  | 2.5E-05            | 2.1E-03  | 9.0E-01  | 2.2E-06        | -7.7E-03 | 6.5E-01  | 2.9E-05        | -8.6E-03 | 6.4E-01           | 3.7E-05        | 1.4E-02  | 4.5E-01  | 9.6E-05        |
| 2.10           | rs11694172 | FAM117B       | 2   | 203240549       | 1.3E-02        | 5.0E-01  | 6.3E-05            | 1.4E-02  | 4.7E-01  | 7.5E-05        | 1.4E-02  | 4.6E-01  | 7.7E-05        | 1.2E-02  | 5.7E-01           | 5.3E-05        | 1.2E-03  | 9.5E-01  | 5.8E-07        |
| 2.11           | rs1250229  | FNI           | 2   | 216012629       | -1.5E-02       | 4.2E-01  | 9.4E-05            | -1.9E-02 | 3.2E-01  | 1.4E-04        | -9.2E-03 | 6.3E-01  | 3.3E-05        | 6.9E-03  | 7.4E-01           | 1.9E-05        | -2.5E-02 | 2.1E-01  | 2.7E-04        |
| 2.12           | rs2943645  | IRS1          | 2   | 226807424       | -1.6E-02       | 3.5E-01  | 1.2E-04            | -2.6E-02 | 1.3E-01  | 3.3E-04        | -2.1E-02 | 2.3E-01  | 2.1E-04        | -2.1E-02 | 2.6E-01           | 2.1E-04        | 2.1E-04  | 9.9E-01  | 2.4E-08        |
| 2.13           | rs11563251 | UGT1A1        | 2   | 234344123       | 2.1E-02        | 4.4E-01  | 8.6E-05            | 9.0E-03  | 7.4E-01  | 1.6E-05        | -3.3E-02 | 2.3E-01  | 2.1E-04        | -4.1E-02 | 1.5E-01           | 3.4E-04        | -4.8E-03 | 8.6E-01  | 5.0E-06        |
| 3.01           | rs2606736  | ATG7          | 3   | 11375249        | 2.7E-02        | 1.2E-01  | 3.4E-04            | 5.8E-03  | 7.4E-01  | 1.6E-05        | 5.9E-03  | 7.4E-01  | 1.6E-05        | 5.7E-03  | 7.6E-01           | 1.5E-05        | 8.8E-03  | 6.3E-01  | 3.9E-05        |
| 3.02           | rs2290159  | RAF1          | 3   | 12603920        | -3.9E-03       | 8.5E-01  | 5.3E-06            | 1.0E-02  | 6.1E-01  | 3.8E-05        | 6.1E-03  | 7.6E-01  | 1.3E-05        | 1.3E-02  | 5.6E-01           | 5.7E-05        | -1.4E-02 | 5.2E-01  | 7.0E-05        |
| 3.03           | rs7640978  | CMTM6         | 3   | 32508014        | -1.5E-02       | 5.9E-01  | 4.1E-05            | -3.3E-03 | 9.0E-01  | 2.0E-06        | 9.7E-03  | 7.3E-01  | 1.7E-05        | -4.1E-03 | 8.9E-01           | 3.1E-06        | 6.5E-03  | 8.3E-01  | 8.1E-06        |
| 3.04           | rs2290547  | SETD2         | 3   | 47036187        | -1.9E-02       | 3.9E-01  | 1.0E-04            | 9.4E-03  | 6.7E-01  | 2.6E-05        | 2.7E-02  | 2.3E-01  | 2.1E-04        | 1.0E-02  | 6.7E-01           | 3.0E-05        | -2.2E-02 | 3.4E-01  | 1.5E-04        |
| 3.05           | rs2013208  | RBM5          | 3   | 50104403        | 2.5E-02        | 1.3E-01  | 3.3E-04            | -6.6E-03 | 6.9E-01  | 2.2E-05        | -1.9E-02 | 2.6E-01  | 1.8E-04        | -9.4E-03 | 6.0E-01           | 4.7E-05        | 4.3E-02  | 1.2E-02  | 1.1E-03        |
| 3.06           | rs13326165 | STAB1         | 3   | 52507158        | 1.8E-02        | 3.9E-01  | 1.1E-04            | -4.7E-03 | 8.2E-01  | 7.4E-06        | -4.2E-03 | 8.4E-01  | 5.8E-06        | -2.0E-03 | 9.3E-01           | 1.4E-06        | 4.3E-02  | 4.6E-02  | 6.7E-04        |
| 3.07           | rs13315871 | PXK           | 3   | 58356327        | 4.7E-02        | 1.1E-01  | 3.6E-04            | 3.1E-02  | 2.9E-01  | 1.6E-04        | 2.7E-02  | 3.6E-01  | 1.2E-04        | 1.7E-03  | 9.6E-01           | 5.1E-07        | 1.4E-02  | 6.5E-01  | 3.4E-05        |
| 3.08           | rs6805251  | GSK3B         | 3   | 121043296       | 3.3E-02        | 5.2E-02  | 5.4E-04            | 3.8E-02  | 2.5E-02  | 7.1E-04        | 1.2E-02  | 4.8E-01  | 7.3E-05        | -1.3E-02 | 4.8E-01           | 8.3E-05        | 8.2E-03  | 6.5E-01  | 3.5E-05        |
| 3.09           | rs17404153 | ACAD11        | 3   | 133645890       | 3.3E-03        | 8.9E-01  | 2.5E-06            | 1.7E-03  | 9.4E-01  | 6.8E-07        | 4.0E-02  | 1.1E-01  | 3.7E-04        | -7.7E-03 | 7.8E-01           | 1.4E-05        | -2.4E-02 | 3.6E-01  | 1.4E-04        |
| 3.10           | rs645040   | MSL2L1        | 3   | 137409312       | -3.7E-03       | 8.5E-01  | 4.9E-06            | -2.9E-02 | 1.5E-01  | 3.0E-04        | -6.8E-03 | 7.3E-01  | 1.7E-05        | -7.4E-04 | 9.7E-01           | 2.0E-07        | -1.7E-02 | 4.2E-01  | 1.1E-04        |
| 4.01           | rs6831256  | LRPAP1        | 4   | 3442937         | 3.5E-02        | 4.2E-02  | 5.9E-04            | 6.7E-02  | 8.1E-05+ | 2.2E-03        | 5.8E-02  | 6.4E-04  | 1.7E-03        | 4.7E-02  | 9.2E-03           | 1.1E-03        | -4.8E-02 | 6.5E-03  | 1.2E-03        |
| 4.02           | rs10019888 | C4orf52       | 4   | 25672088        | 1.7E-03        | 9.4E-01  | 8.4E-07            | 1.1E-02  | 6.1E-01  | 3.7E-05        | 1.6E-02  | 4.7E-01  | 7.6E-05        | -1.3E-02 | 6.0E-01           | 4.6E-05        | -5.2E-02 | 2.8E-02  | 8.1E-04        |
| 4.03           | rs442177   | KLHL8         | 4   | 88249285        | 3.0E-03        | 8.6E-01  | 4.3E-06            | -1.5E-03 | 9.3E-01  | 1.1E-06        | -1.6E-03 | 9.2E-01  | 1.3E-06        | -3.3E-03 | 8.6E-01           | 5.3E-06        | -8.7E-03 | 6.3E-01  | 3.9E-05        |
| 4.04           | rs2199936  | ABCG2 - delta | 4   | 89264355        | 3.6E-02        | 1.8E-01  | 2.5E-04            | 2.9E-02  | 2.8E-01  | 1.7E-04        | 5.1E-02  | 5.8E-02  | 5.1E-04        | 3.3E-02  | 2.5E-01           | 2.3E-04        | 1.0E-02  | 7.2E-01  | 2.2E-05        |
| 4.05           | rs3822072  | FAM13A1       | 4   | 89960292        | -2.9E-02       | 8.3E-02  | 4.3E-04            | -1.7E-03 | 9.2E-01  | 1.5E-06        | 1.1E-02  | 4.9E-01  | 6.7E-05        | 1.8E-02  | 3.2E-01           | 1.6E-04        | -4.1E-02 | 1.8E-02  | 9.4E-04        |

| Cluster number | rsID       | Locus Name          | Chr | Position (hg18) | LDL-C baseline |         | non-HDL-C baseline |          |          | Apo B baseline |          |          | LDL-P baseline |          |          | LDL-size baseline |          |          |                |
|----------------|------------|---------------------|-----|-----------------|----------------|---------|--------------------|----------|----------|----------------|----------|----------|----------------|----------|----------|-------------------|----------|----------|----------------|
|                |            |                     |     |                 | Beta (q)       | P-value | R <sup>2</sup>     | Beta (q) | P-value  | R <sup>2</sup> | Beta (q) | P-value  | R <sup>2</sup> | Beta (q) | P-value  | R <sup>2</sup>    | Beta (q) | P-value  | R <sup>2</sup> |
| 4.06           | rs2602836  | <i>ADH5</i>         | 4   | 100233828       | -4.4E-03       | 7.9E-01 | 9.8E-06            | -9.9E-03 | 5.6E-01  | 4.9E-05        | -2.2E-02 | 1.8E-01  | 2.5E-04        | -1.6E-02 | 3.7E-01  | 1.4E-04           | 1.4E-02  | 4.2E-01  | 1.1E-04        |
| 4.07           | rs13107325 | <i>SLC39A8</i>      | 4   | 103407732       | -3.2E-02       | 2.9E-01 | 1.6E-04            | 2.0E-02  | 5.2E-01  | 5.9E-05        | 1.9E-02  | 5.2E-01  | 5.8E-05        | -2.1E-03 | 9.5E-01  | 7.5E-07           | -4.4E-02 | 1.6E-01  | 3.3E-04        |
| 5.01           | rs6450176  | <i>ARL15</i>        | 5   | 53333782        | -1.5E-02       | 4.7E-01 | 7.5E-05            | -8.7E-03 | 6.8E-01  | 2.4E-05        | 3.4E-03  | 8.7E-01  | 3.8E-06        | 3.1E-03  | 8.9E-01  | 3.1E-06           | -9.1E-03 | 6.8E-01  | 2.8E-05        |
| 5.02           | rs9686661  | <i>MAP3K1</i>       | 5   | 55897543        | -4.2E-02       | 5.9E-02 | 5.1E-04            | 1.6E-02  | 4.7E-01  | 7.3E-05        | 2.1E-02  | 3.3E-01  | 1.4E-04        | 3.8E-02  | 1.0E-01  | 4.5E-04           | -6.8E-02 | 2.9E-03  | 1.5E-03        |
| 5.03           | rs12916    | <i>HMGCR</i>        | 5   | 74692295        | 1.5E-02        | 3.7E-01 | 1.1E-04            | -9.9E-04 | 9.5E-01  | 4.8E-07        | 4.6E-04  | 9.8E-01  | 1.0E-07        | -1.4E-03 | 9.4E-01  | 9.8E-07           | 3.3E-02  | 7.0E-02  | 5.5E-04        |
| 5.04           | rs4530754  | <i>CSNK1G3</i>      | 5   | 122883315       | -1.8E-02       | 2.8E-01 | 1.7E-04            | 8.0E-04  | 9.6E-01  | 3.3E-07        | -5.4E-04 | 9.7E-01  | 1.5E-07        | 7.7E-03  | 6.7E-01  | 3.1E-05           | -2.3E-02 | 1.8E-01  | 3.0E-04        |
| 5.05           | rs6882076  | <i>TIMD4</i>        | 5   | 156322875       | -1.9E-02       | 2.8E-01 | 1.7E-04            | -2.4E-02 | 1.5E-01  | 3.0E-04        | -4.3E-02 | 1.2E-02  | 8.9E-04        | -7.9E-03 | 6.6E-01  | 3.2E-05           | -1.7E-02 | 3.5E-01  | 1.4E-04        |
| 6.01           | rs3757354  | <i>MYLIP</i>        | 6   | 16235386        | -1.7E-02       | 4.1E-01 | 9.5E-05            | -6.9E-03 | 7.3E-01  | 1.7E-05        | 2.8E-03  | 8.9E-01  | 2.8E-06        | 2.4E-02  | 2.6E-01  | 2.1E-04           | -1.5E-02 | 4.6E-01  | 9.1E-05        |
| 6.02           | rs1800562  | <i>HFE</i>          | 6   | 26201120        | -7.1E-02       | 2.5E-02 | 7.2E-04            | -5.7E-02 | 7.4E-02  | 4.5E-04        | -5.2E-02 | 1.0E-01  | 3.8E-04        | -1.4E-02 | 6.7E-01  | 3.0E-05           | -1.5E-03 | 9.6E-01  | 3.6E-07        |
| 6.03           | rs3177928  | <i>HLA</i>          | 6   | 32520413        | 1.2E-03        | 9.6E-01 | 4.0E-07            | 2.9E-02  | 2.2E-01  | 2.1E-04        | 1.1E-02  | 6.5E-01  | 2.9E-05        | -8.8E-03 | 7.3E-01  | 2.0E-05           | -3.0E-02 | 2.2E-01  | 2.5E-04        |
| 6.04           | rs2814982  | <i>C6orf106</i>     | 6   | 34654538        | -4.5E-03       | 8.7E-01 | 4.0E-06            | 2.1E-02  | 4.2E-01  | 9.1E-05        | 3.0E-02  | 2.7E-01  | 1.7E-04        | 2.9E-02  | 3.1E-01  | 1.7E-04           | -1.3E-02 | 6.5E-01  | 3.5E-05        |
| 6.05           | rs2758886  | <i>KCNK17</i>       | 6   | 39358815        | 2.8E-03        | 8.8E-01 | 3.2E-06            | 4.0E-03  | 8.3E-01  | 6.6E-06        | 1.8E-03  | 9.2E-01  | 1.3E-06        | 2.5E-03  | 7.9E-01  | 1.1E-05           | 8.3E-04  | 9.7E-01  | 3.1E-07        |
| 6.06           | rs998584   | <i>VEGFA</i>        | 6   | 43865874        | -2.2E-02       | 1.9E-01 | 2.4E-04            | 1.6E-02  | 3.3E-01  | 1.3E-04        | 1.8E-02  | 2.8E-01  | 1.6E-04        | 3.8E-02  | 3.3E-02  | 7.7E-04           | -7.5E-02 | 1.9E-05* | 3.1E-03        |
| 6.07           | rs9488822  | <i>FRK</i>          | 6   | 116419586       | -4.1E-02       | 1.7E-02 | 8.0E-04            | -3.4E-02 | 4.9E-02  | 5.5E-04        | -3.7E-02 | 3.2E-02  | 6.5E-04        | -1.6E-02 | 3.9E-01  | 1.3E-04           | 5.2E-03  | 7.7E-01  | 1.4E-05        |
| 6.08           | rs1936800  | <i>RSP03</i>        | 6   | 127477757       | -1.1E-02       | 5.2E-01 | 5.9E-05            | -2.8E-02 | 8.7E-02  | 4.2E-04        | 5.2E-03  | 7.6E-01  | 1.4E-05        | 1.5E-02  | 3.9E-01  | 1.2E-04           | 1.1E-02  | 5.4E-01  | 6.5E-05        |
| 6.09           | rs9376090  | <i>HBS1L</i>        | 6   | 135452921       | 7.7E-03        | 6.8E-01 | 2.4E-05            | 1.3E-02  | 4.8E-01  | 6.9E-05        | 1.7E-02  | 3.8E-01  | 1.1E-04        | 2.3E-02  | 2.6E-01  | 2.1E-04           | -4.7E-02 | 1.8E-02  | 9.4E-04        |
| 6.10           | rs605066   | <i>CITED2</i>       | 6   | 139871359       | 6.6E-03        | 7.0E-01 | 2.2E-05            | 2.7E-02  | 1.1E-01  | 3.5E-04        | 2.2E-02  | 2.0E-01  | 2.4E-04        | 1.4E-02  | 4.6E-01  | 9.4E-05           | -3.4E-02 | 5.3E-02  | 6.3E-04        |
| 6.11           | rs1564348  | <i>LPA</i>          | 6   | 160498850       | 3.0E-02        | 2.0E-01 | 2.3E-04            | 1.8E-02  | 4.4E-01  | 8.4E-05        | 1.8E-02  | 4.4E-01  | 8.5E-05        | -1.9E-02 | 4.4E-01  | 9.9E-05           | 1.8E-03  | 9.4E-01  | 9.2E-07        |
| 6.12           | rs10455872 | <i>LPA - delta</i>  | 6   | 160930108       | 4.9E-02        | 1.8E-01 | 2.5E-04            | 1.2E-02  | 7.4E-01  | 1.5E-05        | 8.1E-02  | 2.9E-02  | 6.8E-04        | -1.1E-02 | 7.7E-01  | 1.5E-05           | 3.8E-02  | 3.2E-01  | 1.7E-04        |
| 7.01           | rs1997243  | <i>GPR146</i>       | 7   | 1050303         | -9.2E-03       | 6.9E-01 | 2.3E-05            | -1.8E-02 | 4.2E-01  | 9.2E-05        | 1.4E-02  | 5.5E-01  | 5.2E-05        | 1.2E-02  | 6.1E-01  | 4.3E-05           | 5.6E-02  | 1.9E-02  | 9.3E-04        |
| 7.02           | rs702485   | <i>DAGLB</i>        | 7   | 6415797         | 1.8E-02        | 2.9E-01 | 1.6E-04            | 2.6E-03  | 8.8E-01  | 3.5E-06        | 3.9E-03  | 8.2E-01  | 7.7E-06        | -8.0E-03 | 6.5E-01  | 3.4E-05           | 2.0E-03  | 9.1E-01  | 2.3E-06        |
| 7.03           | rs4142995  | <i>SNX13</i>        | 7   | 17885783        | -1.4E-02       | 4.1E-01 | 9.5E-05            | -3.8E-03 | 8.2E-01  | 7.1E-06        | 1.9E-03  | 9.1E-01  | 1.7E-06        | 8.9E-03  | 6.3E-01  | 4.0E-05           | -4.6E-03 | 8.0E-01  | 1.1E-05        |
| 7.04           | rs2285942  | <i>DNAH11</i>       | 7   | 21549442        | -2.7E-02       | 2.6E-01 | 1.8E-04            | 8.3E-03  | 7.3E-01  | 1.7E-05        | 2.5E-02  | 3.0E-01  | 1.5E-04        | -3.2E-03 | 9.0E-01  | 2.6E-06           | -1.1E-02 | 6.6E-01  | 3.2E-05        |
| 7.05           | rs4722551  | <i>MIR148A</i>      | 7   | 25958351        | 3.7E-02        | 1.1E-01 | 3.7E-04            | 3.8E-03  | 8.7E-01  | 3.9E-06        | 1.2E-02  | 6.1E-01  | 3.8E-05        | -1.7E-02 | 4.8E-01  | 8.3E-05           | 7.0E-02  | 3.6E-03  | 1.4E-03        |
| 7.06           | rs2072183  | <i>NPC1L1</i>       | 7   | 44545705        | 6.7E-03        | 7.5E-01 | 1.4E-05            | -2.5E-02 | 2.4E-01  | 2.0E-04        | -2.7E-02 | 2.0E-01  | 2.4E-04        | -3.1E-02 | 1.7E-01  | 3.2E-04           | 7.6E-03  | 7.3E-01  | 2.0E-05        |
| 7.07           | rs4917014  | <i>IKZF1</i>        | 7   | 50276409        | -1.2E-02       | 5.1E-01 | 6.2E-05            | -2.6E-03 | 8.8E-01  | 3.0E-06        | -9.6E-03 | 5.9E-01  | 4.1E-05        | -2.6E-02 | 1.7E-01  | 3.1E-04           | 8.4E-03  | 6.5E-01  | 3.5E-05        |
| 7.08           | rs7811265  | <i>MLXIPL</i>       | 7   | 72572446        | 2.6E-02        | 2.1E-01 | 2.2E-04            | -5.3E-02 | 1.1E-02  | 9.2E-04        | -4.1E-02 | 4.8E-02  | 5.6E-04        | -5.3E-02 | 1.8E-02  | 9.5E-04           | 9.8E-02  | 5.9E-06* | 3.5E-03        |
| 7.09           | rs38855    | <i>MET</i>          | 7   | 116145280       | -1.9E-02       | 2.5E-01 | 1.9E-04            | -2.5E-02 | 1.4E-01  | 3.1E-04        | -2.0E-02 | 2.3E-01  | 2.1E-04        | -2.3E-02 | 2.0E-01  | 2.7E-04           | -2.0E-02 | 2.5E-01  | 2.3E-04        |
| 7.10           | rs4731702  | <i>KLF14</i>        | 7   | 130083924       | -1.6E-02       | 3.3E-01 | 1.4E-04            | -1.9E-03 | 9.1E-01  | 1.8E-06        | -2.1E-02 | 2.1E-01  | 2.2E-04        | -1.9E-02 | 2.8E-01  | 2.0E-04           | -8.4E-03 | 6.3E-01  | 3.9E-05        |
| 7.11           | rs17173637 | <i>TMEM176A</i>     | 7   | 150160382       | 3.5E-02        | 2.4E-01 | 2.0E-04            | 5.5E-02  | 6.1E-02  | 5.0E-04        | 4.0E-02  | 1.8E-01  | 2.5E-04        | 5.5E-02  | 8.2E-02  | 5.1E-04           | -3.5E-02 | 2.5E-01  | 2.2E-04        |
| 8.01           | rs9987289  | <i>PPP1R3B</i>      | 8   | 9220768         | -3.3E-02       | 2.7E-01 | 1.7E-04            | -2.3E-03 | 9.4E-01  | 8.6E-07        | 1.1E-02  | 7.1E-01  | 1.9E-05        | 4.9E-02  | 1.2E-01  | 4.0E-04           | -5.4E-02 | 8.0E-02  | 5.2E-04        |
| 8.02           | rs11776767 | <i>PINX1</i>        | 8   | 10721339        | 1.5E-03        | 9.3E-01 | 1.1E-06            | 2.6E-02  | 1.3E-01  | 3.3E-04        | 3.6E-02  | 4.1E-02  | 6.0E-04        | 3.5E-02  | 6.0E-02  | 6.0E-04           | -4.3E-02 | 1.7E-02  | 9.7E-04        |
| 8.03           | rs1495743  | <i>NAT2</i>         | 8   | 18317580        | -2.0E-02       | 3.3E-01 | 1.4E-04            | 2.4E-02  | 2.3E-01  | 2.0E-04        | 2.5E-04  | 9.9E-01  | 2.2E-08        | -4.3E-03 | 8.5E-01  | 6.4E-06           | -1.6E-02 | 4.6E-01  | 9.3E-05        |
| 8.04           | rs12678919 | <i>LPL</i>          | 8   | 19888502        | 2.3E-03        | 9.4E-01 | 9.3E-07            | -1.4E-01 | 1.9E-06* | 3.2E-03        | -9.9E-02 | 5.2E-04  | 1.7E-03        | -3.9E-02 | 1.9E-01  | 2.8E-04           | 1.4E-01  | 2.6E-06* | 3.7E-03        |
| 8.05           | rs10102164 | <i>SOX17</i>        | 8   | 55584167        | 5.7E-02        | 6.3E-03 | 1.1E-03            | 5.8E-02  | 5.4E-03  | 1.1E-03        | 5.0E-02  | 1.7E-02  | 8.0E-04        | 3.6E-02  | 1.0E-01  | 4.4E-04           | -1.4E-03 | 9.5E-01  | 6.9E-07        |
| 8.06           | rs1030431  | <i>CYP7A1</i>       | 8   | 59474251        | 3.8E-02        | 3.2E-02 | 6.5E-04            | 3.5E-02  | 5.3E-02  | 5.3E-04        | 2.5E-02  | 1.6E-01  | 2.8E-04        | 5.2E-03  | 7.9E-01  | 1.2E-05           | 3.4E-02  | 6.9E-02  | 5.6E-04        |
| 8.07           | rs2293889  | <i>TRPS1</i>        | 8   | 116668374       | -1.4E-02       | 4.1E-01 | 9.4E-05            | 7.7E-04  | 9.6E-01  | 3.0E-07        | -1.7E-03 | 9.2E-01  | 1.5E-06        | -1.8E-02 | 3.3E-01  | 1.6E-04           | 9.7E-03  | 5.8E-01  | 5.1E-05        |
| 8.08           | rs2954029  | <i>TRIB1</i>        | 8   | 126560154       | 5.9E-02        | 4.5E-04 | 1.7E-03            | -1.0E-01 | 5.4E-10* | 5.5E-03        | -6.8E-02 | 4.6E-05* | 2.4E-03        | -8.1E-02 | 6.5E-06* | 3.4E-03           | 8.6E-02  | 8.0E-07* | 4.1E-03        |
| 8.09           | rs11136341 | <i>PLEC1</i>        | 8   | 145115531       | 5.5E-03        | 7.5E-01 | 1.4E-05            | -1.5E-02 | 3.8E-01  | 1.1E-04        | 1.9E-03  | 9.1E-01  | 1.7E-06        | -6.2E-03 | 7.4E-01  | 1.8E-05           | 2.6E-02  | 1.6E-01  | 3.4E-04        |
| 9.01           | rs3780181  | <i>VLDLR</i>        | 9   | 2630759         | -6.3E-02       | 6.1E-02 | 5.0E-04            | -5.0E-02 | 1.3E-01  | 3.2E-04        | -5.9E-02 | 8.0E-02  | 4.4E-04        | -8.5E-02 | 1.9E-02  | 9.3E-04           | 2.9E-02  | 4.1E-01  | 1.2E-04        |
| 9.02           | rs643531   | <i>TTC39B</i>       | 9   | 15286034        | 4.3E-02        | 7.5E-02 | 4.5E-04            | 1.0E-02  | 6.8E-01  | 2.5E-05        | -2.7E-02 | 2.8E-01  | 1.7E-04        | -5.4E-02 | 3.9E-02  | 7.1E-04           | 8.4E-02  | 9.7E-04  | 1.8E-03        |
| 9.03           | rs1883025  | <i>ABCA1</i>        | 9   | 106704122       | 4.8E-02        | 1.1E-02 | 9.2E-04            | 2.8E-02  | 1.3E-01  | 3.2E-04        | 2.9E-02  | 1.2E-01  | 3.4E-04        | 6.6E-02  | 1.1E-03  | 1.8E-03           | 2.4E-03  | 9.0E-01  | 2.6E-06        |
| 9.04           | rs649129   | <i>ABO</i>          | 9   | 135144125       | 4.6E-02        | 2.8E-02 | 6.9E-04            | 3.5E-02  | 9.3E-02  | 4.0E-04        | 2.1E-02  | 3.2E-01  | 1.4E-04        | -1.3E-02 | 5.7E-01  | 5.3E-05           | 2.0E-02  | 3.8E-01  | 1.3E-04        |
| 10.01          | rs1832007  | <i>AKR1C4</i>       | 10  | 5244847         | 2.8E-02        | 2.3E-01 | 2.1E-04            | -2.4E-02 | 3.0E-01  | 1.5E-04        | 2.0E-03  | 9.3E-01  | 1.0E-06        | -1.2E-02 | 6.3E-01  | 3.8E-05           | 1.4E-02  | 5.7E-01  | 5.5E-05        |
| 10.02          | rs10904908 | <i>TRDMT1</i>       | 10  | 17300296        | -6.9E-03       | 6.8E-01 | 2.4E-05            | -1.0E-02 | 5.4E-01  | 5.3E-05        | -1.2E-02 | 4.6E-01  | 7.7E-05        | -2.1E-02 | 2.6E-01  | 2.2E-04           | 3.0E-02  | 9.0E-02  | 4.8E-04        |
| 10.03          | rs970548   | <i>MARCH8-ALOX5</i> | 10  | 45333283        | 1.3E-02        | 4.8E-01 | 7.1E-05            | 1.1E-02  | 5.5E-01  | 5.2E-05        | 6.9E-03  | 7.2E-01  | 1.9E-05        | 3.1E-03  | 8.8E-01  | 4.0E-06           | 2.9E-02  | 1.5E-01  | 3.5E-04        |
| 10.04          | rs10761731 | <i>JMJD1C</i>       | 10  | 64697616        | 2.3E-02        | 1.8E-01 | 2.5E-04            | -1.7E-02 | 3.2E-01  | 1.4E-04        | -5.3E-03 | 7.5E-01  | 1.4E-05        | -5.5E-03 | 7.6E-01  | 1.6E-05           | 2.9E-02  | 1.0E-01  | 4.5E-04        |
| 10.05          | rs2068888  | <i>CYP26A1</i>      | 10  | 94829632        | 3.5E-02        | 3.8E-02 | 6.1E-04            | 1.8E-02  | 2.7E-01  | 1.7E-04        | 1.5E-02  | 3.6E-01  | 1.2E-04        | 8.4E-03  | 6.4E-01  | 3.7E-05           | -1.0E-02 | 5.6E-01  | 5.8E-05        |

| Cluster number | rsID       | Locus Name             | Chr | Position (hg18) | LDL-C baseline |          | non-HDL-C baseline |          | Apo B baseline |                | LDL-P baseline |          |                | LDL-size baseline |          |                |          |          |                |
|----------------|------------|------------------------|-----|-----------------|----------------|----------|--------------------|----------|----------------|----------------|----------------|----------|----------------|-------------------|----------|----------------|----------|----------|----------------|
|                |            |                        |     |                 | Beta (q)       | P-value  | R <sup>2</sup>     | Beta (q) | P-value        | R <sup>2</sup> | Beta (q)       | P-value  | R <sup>2</sup> | Beta (q)          | P-value  | R <sup>2</sup> | Beta (q) | P-value  | R <sup>2</sup> |
| 10.06          | rs2255141  | <i>GPAM</i>            | 10  | 113923876       | 1.1E-02        | 5.6E-01  | 4.7E-05            | -1.8E-02 | 3.4E-01        | 1.3E-04        | -5.2E-03       | 7.8E-01  | 1.1E-05        | -6.9E-03          | 7.3E-01  | 2.0E-05        | 3.3E-02  | 9.4E-02  | 4.7E-04        |
| 11.01          | rs2923084  | <i>AMPD3</i>           | 11  | 10345358        | -3.8E-03       | 8.6E-01  | 4.4E-06            | 7.8E-03  | 7.2E-01        | 1.8E-05        | 1.7E-02        | 4.3E-01  | 9.1E-05        | -8.7E-03          | 7.1E-01  | 2.3E-05        | -2.3E-02 | 3.1E-01  | 1.8E-04        |
| 11.02          | rs10832963 | <i>SPTY2D1</i>         | 11  | 18620817        | 7.4E-03        | 7.0E-01  | 2.2E-05            | 5.3E-03  | 7.8E-01        | 1.1E-05        | -2.1E-02       | 2.8E-01  | 1.7E-04        | -2.6E-02          | 2.1E-01  | 2.7E-04        | -2.6E-02 | 1.9E-01  | 2.9E-04        |
| 11.03          | rs3136441  | <i>LRP4</i>            | 11  | 46699823        | 2.4E-02        | 3.1E-01  | 1.4E-04            | -7.0E-03 | 7.7E-01        | 1.2E-05        | -1.2E-02       | 6.2E-01  | 3.5E-05        | -2.5E-02          | 3.3E-01  | 1.6E-04        | 6.2E-02  | 1.5E-02  | 1.0E-03        |
| 11.04          | rs11246602 | <i>OR4C46</i>          | 11  | 51368666        | -5.0E-03       | 8.4E-01  | 5.7E-06            | 2.4E-02  | 3.5E-01        | 1.2E-04        | -2.1E-02       | 4.2E-01  | 9.5E-05        | -6.9E-03          | 8.0E-01  | 1.1E-05        | 1.4E-02  | 6.1E-01  | 4.4E-05        |
| 11.05          | rs174546   | <i>FADS123</i>         | 11  | 61326406        | -4.2E-02       | 1.5E-02  | 8.3E-04            | -2.2E-02 | 2.0E-01        | 2.3E-04        | -2.2E-02       | 2.1E-01  | 2.2E-04        | -5.7E-02          | 2.3E-03  | 1.6E-03        | 6.8E-03  | 7.1E-01  | 2.4E-05        |
| 11.06          | rs12801636 | <i>KAT5</i>            | 11  | 65147893        | 2.4E-02        | 2.3E-01  | 2.0E-04            | 1.8E-02  | 3.7E-01        | 1.2E-04        | -1.5E-02       | 4.6E-01  | 7.8E-05        | -1.2E-02          | 5.9E-01  | 4.8E-05        | 4.0E-02  | 5.9E-02  | 6.0E-04        |
| 11.07          | rs499974   | <i>MOGAT2-DGAT2</i>    | 11  | 75132669        | 2.3E-03        | 9.2E-01  | 1.4E-06            | 8.4E-03  | 7.1E-01        | 2.0E-05        | 2.6E-02        | 2.4E-01  | 1.9E-04        | 1.5E-02           | 5.3E-01  | 6.8E-05        | 7.7E-04  | 9.7E-01  | 1.8E-07        |
| 11.08          | rs964184   | <i>APOA1C3A4A5</i>     | 11  | 116154127       | -8.1E-02       | 1.4E-03  | 1.4E-03            | 1.1E-01  | 1.2E-05*       | 2.7E-03        | 6.1E-02        | 1.7E-02  | 8.1E-04        | 5.5E-02           | 4.6E-02  | 6.7E-04        | -2.7E-01 | 1.7E-24* | 1.7E-02        |
| 11.09          | rs11603023 | <i>PHLDB1</i>          | 11  | 117991277       | 8.6E-03        | 6.0E-01  | 3.8E-05            | 4.5E-03  | 7.9E-01        | 1.0E-05        | 6.4E-03        | 7.0E-01  | 2.1E-05        | 9.3E-03           | 6.0E-01  | 4.5E-05        | -5.7E-03 | 7.5E-01  | 1.8E-05        |
| 11.10          | rs7941030  | <i>UBASH3B</i>         | 11  | 122027585       | 7.0E-03        | 6.8E-01  | 2.4E-05            | -1.4E-02 | 4.2E-01        | 9.4E-05        | -1.1E-02       | 5.3E-01  | 5.5E-05        | 8.4E-03           | 6.5E-01  | 3.5E-05        | 2.7E-03  | 8.8E-01  | 3.9E-06        |
| 11.11          | rs11220462 | <i>ST3GALA</i>         | 11  | 125749162       | 4.1E-02        | 1.0E-01  | 3.8E-04            | 6.3E-02  | 1.2E-02        | 8.9E-04        | 5.5E-02        | 3.2E-02  | 6.5E-04        | 2.9E-02           | 2.9E-01  | 1.9E-04        | 7.2E-04  | 9.8E-01  | 1.2E-07        |
| 12.01          | rs4883201  | <i>PHC1-A2ML1</i>      | 12  | 8973848         | -6.0E-02       | 2.6E-02  | 7.0E-04            | -8.0E-02 | 3.3E-03        | 1.2E-03        | -8.3E-02       | 2.4E-03  | 1.3E-03        | -4.8E-02          | 1.0E-01  | 4.5E-04        | 1.8E-02  | 5.3E-01  | 6.5E-05        |
| 12.02          | rs7134375  | <i>PDE3A</i>           | 12  | 20365025        | 5.7E-03        | 7.4E-01  | 1.6E-05            | -1.9E-02 | 2.7E-01        | 1.7E-04        | -2.8E-02       | 1.0E-01  | 3.8E-04        | -2.5E-02          | 1.6E-01  | 3.3E-04        | 1.1E-02  | 5.3E-01  | 6.6E-05        |
| 12.03          | rs12317268 | <i>SLCO1B1 - delta</i> | 12  | 21243808        | 1.1E-02        | 6.3E-01  | 3.2E-05            | 1.2E-02  | 5.9E-01        | 4.1E-05        | 2.3E-02        | 3.2E-01  | 1.4E-04        | 2.8E-02           | 2.5E-01  | 2.2E-04        | -8.5E-03 | 7.2E-01  | 2.1E-05        |
| 12.04          | rs11613352 | <i>LRP1</i>            | 12  | 56078847        | -2.6E-02       | 1.8E-01  | 2.6E-04            | -6.1E-02 | 1.9E-03        | 1.4E-03        | -7.8E-02       | 7.8E-05+ | 2.2E-03        | -6.6E-02          | 1.8E-03  | 1.6E-03        | 2.0E-02  | 3.4E-01  | 1.5E-04        |
| 12.05          | rs7134594  | <i>MVK</i>             | 12  | 108484576       | 2.0E-02        | 2.4E-01  | 1.9E-04            | 2.3E-02  | 1.8E-01        | 2.6E-04        | 4.0E-02        | 1.9E-02  | 7.8E-04        | 4.6E-02           | 1.1E-02  | 1.1E-03        | -2.0E-02 | 2.7E-01  | 2.0E-04        |
| 12.06          | rs11065987 | <i>BRAP</i>            | 12  | 110556807       | 1.0E-03        | 9.5E-01  | 5.1E-07            | -1.8E-03 | 9.2E-01        | 1.6E-06        | 2.5E-03        | 8.9E-01  | 3.0E-06        | -2.5E-04          | 9.9E-01  | 3.2E-08        | -2.6E-03 | 8.9E-01  | 3.5E-06        |
| 12.07          | rs1169288  | <i>HNF1A</i>           | 12  | 119901033       | -1.6E-03       | 9.3E-01  | 1.0E-06            | -1.7E-03 | 9.3E-01        | 1.1E-06        | 1.1E-02        | 5.5E-01  | 5.0E-05        | 4.9E-03           | 8.1E-01  | 9.6E-06        | 2.2E-02  | 2.7E-01  | 2.1E-04        |
| 12.08          | rs4759375  | <i>SBN1</i>            | 12  | 122362191       | -1.8E-02       | 5.2E-01  | 6.0E-05            | 7.4E-03  | 7.9E-01        | 9.8E-06        | 1.5E-02        | 6.0E-01  | 4.0E-05        | 1.9E-03           | 9.5E-01  | 6.1E-07        | -4.5E-03 | 8.8E-01  | 3.8E-06        |
| 12.09          | rs4765127  | <i>ZNF664</i>          | 12  | 123026120       | -2.5E-02       | 1.6E-01  | 2.8E-04            | -1.8E-02 | 3.2E-01        | 1.4E-04        | -3.8E-02       | 3.3E-02  | 6.5E-04        | -4.0E-02          | 3.2E-02  | 7.8E-04        | 6.8E-03  | 7.1E-01  | 2.3E-05        |
| 12.10          | rs838880   | <i>SCARB1</i>          | 12  | 123827546       | 1.3E-02        | 4.8E-01  | 7.2E-05            | 2.9E-03  | 8.7E-01        | 3.6E-06        | -7.7E-03       | 6.7E-01  | 2.6E-05        | 3.7E-03           | 8.5E-01  | 6.0E-06        | -2.2E-03 | 9.1E-01  | 2.3E-06        |
| 13.01          | rs4942486  | <i>BRCA2</i>           | 13  | 31851388        | -2.0E-03       | 9.0E-01  | 2.1E-06            | -4.7E-03 | 7.8E-01        | 1.1E-05        | 8.2E-03        | 6.2E-01  | 3.4E-05        | 2.1E-02           | 2.3E-01  | 2.4E-04        | -1.2E-02 | 5.0E-01  | 7.8E-05        |
| 14.01          | rs2332328  | <i>NYNRIN</i>          | 14  | 23952898        | 2.4E-02        | 1.5E-01  | 2.9E-04            | 2.3E-04  | 9.9E-01        | 2.7E-08        | 5.7E-03        | 7.4E-01  | 1.6E-05        | 2.4E-02           | 1.7E-01  | 3.1E-04        | 3.0E-02  | 8.8E-02  | 4.9E-04        |
| 14.02          | rs4983559  | <i>ZBTB42-AKT1</i>     | 14  | 104348254       | 1.0E-02        | 5.5E-01  | 5.2E-05            | -1.9E-02 | 2.6E-01        | 1.8E-04        | -1.7E-02       | 3.2E-01  | 1.4E-04        | -2.9E-02          | 1.2E-01  | 4.1E-04        | 1.8E-02  | 3.3E-01  | 1.6E-04        |
| 15.01          | rs8035382  | <i>FRMD5</i>           | 15  | 42031815        | 2.7E-02        | 4.9E-01  | 6.7E-05            | 2.5E-02  | 5.3E-01        | 5.5E-05        | -7.2E-04       | 9.9E-01  | 4.6E-08        | -5.0E-02          | 2.3E-01  | 2.4E-04        | 1.5E-02  | 7.1E-01  | 2.3E-05        |
| 15.02          | rs1532085  | <i>LIPC</i>            | 15  | 56470658        | 2.3E-02        | 1.8E-01  | 2.6E-04            | 2.2E-02  | 2.0E-01        | 2.4E-04        | 3.0E-02        | 8.8E-02  | 4.2E-04        | 3.2E-02           | 8.4E-02  | 5.0E-04        | 8.3E-02  | 4.2E-06* | 3.6E-03        |
| 15.03          | rs2652834  | <i>LACTB</i>           | 15  | 61183920        | -1.5E-02       | 4.6E-01  | 7.7E-05            | 9.0E-03  | 6.6E-01        | 2.7E-05        | 1.3E-02        | 5.2E-01  | 5.8E-05        | 1.2E-02           | 5.8E-01  | 5.0E-05        | -1.5E-02 | 4.8E-01  | 8.5E-05        |
| 16.01          | rs3198697  | <i>PDXDC1</i>          | 16  | 15037441        | -2.3E-02       | 1.7E-01  | 2.7E-04            | -4.1E-02 | 1.5E-02        | 8.4E-04        | -2.1E-02       | 2.3E-01  | 2.1E-04        | -9.7E-04          | 9.6E-01  | 4.8E-07        | -2.6E-03 | 8.8E-01  | 3.8E-06        |
| 16.02          | rs11649653 | <i>CTF1</i>            | 16  | 30825988        | 2.4E-02        | 1.6E-01  | 2.9E-04            | 2.0E-02  | 2.4E-01        | 1.9E-04        | 5.2E-02        | 2.6E-03  | 1.3E-03        | 2.1E-02           | 2.5E-01  | 2.2E-04        | -6.9E-03 | 7.0E-01  | 2.5E-05        |
| 16.03          | rs1121980  | <i>FTO</i>             | 16  | 52366748        | -1.5E-03       | 9.3E-01  | 1.2E-06            | -1.8E-03 | 9.1E-01        | 1.7E-06        | 5.0E-03        | 7.7E-01  | 1.3E-05        | 1.8E-02           | 3.0E-01  | 1.8E-04        | -3.1E-02 | 7.6E-02  | 5.3E-04        |
| 16.04          | rs3764261  | <i>CETP</i>            | 16  | 55550825        | -1.3E-02       | 4.6E-01  | 7.8E-05            | -6.4E-02 | 2.3E-04+       | 1.9E-03        | -5.9E-02       | 8.1E-04  | 1.6E-03        | -1.1E-01          | 1.2E-08* | 5.4E-03        | 1.8E-01  | 1.3E-22* | 1.6E-02        |
| 16.05          | rs16942887 | <i>LCAT</i>            | 16  | 66485543        | 2.6E-02        | 3.0E-01  | 1.6E-04            | 2.4E-02  | 3.4E-01        | 1.3E-04        | -1.9E-02       | 4.4E-01  | 8.3E-05        | -5.1E-02          | 6.2E-02  | 5.8E-04        | 5.4E-02  | 4.0E-02  | 7.1E-04        |
| 16.06          | rs2000999  | <i>HPR</i>             | 16  | 70665594        | 3.5E-02        | 1.1E-01  | 3.6E-04            | 2.7E-02  | 2.2E-01        | 2.1E-04        | 3.6E-02        | 1.0E-01  | 3.8E-04        | 2.8E-02           | 2.4E-01  | 2.4E-04        | -5.3E-02 | 2.1E-02  | 8.9E-04        |
| 16.07          | rs2925979  | <i>CMIP</i>            | 16  | 80092291        | -9.7E-03       | 6.0E-01  | 4.0E-05            | 1.9E-02  | 3.0E-01        | 1.5E-04        | 4.0E-02        | 3.1E-02  | 6.6E-04        | 2.7E-02           | 1.7E-01  | 3.1E-04        | -4.0E-02 | 3.8E-02  | 7.2E-04        |
| 17.01          | rs314253   | <i>DLG4</i>            | 17  | 7032374         | -6.7E-03       | 7.0E-01  | 2.1E-05            | 5.4E-03  | 7.6E-01        | 1.4E-05        | 1.9E-02        | 2.8E-01  | 1.7E-04        | 2.2E-03           | 9.0E-01  | 2.4E-06        | 1.1E-02  | 5.5E-01  | 6.0E-05        |
| 17.02          | rs881844   | <i>STARD3</i>          | 17  | 35063744        | 7.4E-03        | 6.8E-01  | 2.5E-05            | 1.6E-02  | 3.7E-01        | 1.2E-04        | 2.8E-02        | 1.1E-01  | 3.7E-04        | 2.9E-02           | 1.3E-01  | 3.8E-04        | -2.5E-02 | 1.8E-01  | 3.1E-04        |
| 17.03          | rs8077889  | <i>MPP3</i>            | 17  | 39233692        | -3.9E-02       | 5.5E-02  | 5.2E-04            | -2.1E-02 | 3.0E-01        | 1.5E-04        | -2.2E-02       | 2.7E-01  | 1.7E-04        | -3.1E-02          | 1.6E-01  | 3.3E-04        | 2.2E-02  | 3.0E-01  | 1.8E-04        |
| 17.04          | rs7225700  | <i>OSBPL7</i>          | 17  | 42746803        | -2.8E-02       | 1.2E-01  | 3.5E-04            | -2.5E-02 | 1.5E-01        | 2.9E-04        | -3.1E-02       | 8.0E-02  | 4.4E-04        | -3.2E-02          | 9.2E-02  | 4.8E-04        | -5.5E-03 | 7.6E-01  | 1.5E-05        |
| 17.05          | rs1801689  | <i>APOH-PRXCA</i>      | 17  | 61641042        | -1.2E-02       | 8.2E-01  | 7.3E-06            | -9.4E-02 | 6.5E-02        | 4.8E-04        | -4.2E-02       | 4.2E-01  | 9.3E-05        | 2.0E-02           | 7.3E-01  | 2.0E-05        | 4.2E-02  | 4.4E-01  | 9.8E-05        |
| 17.06          | rs4148008  | <i>ABCA8</i>           | 17  | 64386889        | 2.6E-03        | 8.9E-01  | 2.9E-06            | 1.9E-02  | 2.8E-01        | 1.6E-04        | 2.9E-02        | 1.1E-01  | 3.7E-04        | 3.0E-03           | 8.8E-01  | 3.8E-06        | -2.2E-02 | 2.6E-01  | 2.2E-04        |
| 17.07          | rs4082919  | <i>PGS1</i>            | 17  | 73889077        | -5.1E-03       | 7.6E-01  | 1.3E-05            | -1.4E-02 | 4.0E-01        | 9.9E-05        | 3.4E-03        | 8.4E-01  | 5.9E-06        | -1.1E-02          | 5.4E-05  | 1.1E-03        | 6.4E-05  | 1.1E-03  | 6.7E-07        |
| 18.01          | rs7241918  | <i>LIPG</i>            | 18  | 45414951        | -5.6E-02       | 1.0E-02  | 9.4E-04            | -2.1E-02 | 3.3E-01        | 1.4E-04        | 1.3E-02        | 5.7E-01  | 4.7E-05        | 6.2E-04           | 9.8E-01  | 1.2E-07        | -3.5E-02 | 1.3E-01  | 3.9E-04        |
| 18.02          | rs12967135 | <i>MC4R</i>            | 18  | 56000003        | 1.0E-02        | 6.1E-01  | 3.8E-05            | -2.1E-03 | 9.2E-01        | 1.6E-06        | -2.1E-02       | 3.0E-01  | 1.6E-04        | -2.9E-02          | 1.8E-01  | 3.0E-04        | 3.4E-02  | 1.1E-01  | 4.4E-04        |
| 19.01          | rs7248104  | <i>INSR</i>            | 19  | 7175431         | -1.2E-02       | 5.0E-01  | 6.6E-05            | -4.4E-03 | 8.0E-01        | 9.3E-06        | 4.8E-04        | 9.8E-01  | 1.1E-07        | -2.1E-02          | 2.5E-01  | 2.2E-04        | 1.6E-02  | 3.8E-01  | 1.3E-04        |
| 19.02          | rs7255436  | <i>ANGPTL4</i>         | 19  | 8339196         | 1.9E-02        | 2.5E-01  | 1.9E-04            | 2.4E-02  | 1.5E-01        | 2.9E-04        | 3.6E-02        | 3.2E-02  | 6.5E-04        | 6.7E-02           | 1.8E-04+ | 2.4E-03        | -3.7E-02 | 3.5E-02  | 7.5E-04        |
| 19.03          | rs11672123 | <i>LDLR - delta</i>    | 19  | 11055823        | -4.4E-02       | 2.7E-01  | 1.7E-04            | -2.9E-02 | 4.7E-01        | 7.4E-05        | 9.5E-03        | 8.1E-01  | 7.9E-06        | 2.3E-02           | 6.1E-01  | 4.4E-05        | 5.8E-02  | 1.7E-01  | 3.1E-04        |
| 19.04          | rs6511720  | <i>LDLR</i>            | 19  | 11063306        | -1.1E-01       | 3.0E-06* | 3.1E-03            | -7.7E-02 | 8.4E-04        | 1.6E-03        | -9.7E-02       | 3.5E-05* | 2.4E-03        | -8.2E-02          | 9.0E-04  | 1.9E-03        | -1.5E-02 | 5.3E-01  | 6.7E-05        |



| Cluster number | rsID       | Locus Name          | Chr | Position (hg18) | LDL-C baseline |          | non-HDL-C baseline |          |          | Apo B baseline |          |          | LDL-P baseline |          |           | LDL-size baseline |          |          |                |
|----------------|------------|---------------------|-----|-----------------|----------------|----------|--------------------|----------|----------|----------------|----------|----------|----------------|----------|-----------|-------------------|----------|----------|----------------|
|                |            |                     |     |                 | Beta (q)       | P-value  | R <sup>2</sup>     | Beta (q) | P-value  | R <sup>2</sup> | Beta (q) | P-value  | R <sup>2</sup> | Beta (q) | P-value   | R <sup>2</sup>    | Beta (q) | P-value  | R <sup>2</sup> |
| 19.05          | rs737337   | <i>LOC55908</i>     | 19  | 11208493        | -5.8E-03       | 8.5E-01  | 4.9E-06            | 3.3E-02  | 2.9E-01  | 1.6E-04        | 7.0E-02  | 2.5E-02  | 7.2E-04        | 7.1E-02  | 3.6E-02   | 7.4E-04           | -4.7E-02 | 1.5E-01  | 3.5E-04        |
| 19.06          | rs10401969 | <i>CILP2</i>        | 19  | 19268718        | -6.3E-02       | 3.4E-02  | 6.4E-04            | -1.7E-01 | 4.8E-09* | 4.9E-03        | -1.2E-01 | 3.6E-05* | 2.4E-03        | -9.7E-02 | 2.2E-03   | 1.6E-03           | 4.3E-03  | 8.9E-01  | 3.3E-06        |
| 19.07          | rs731839   | <i>PEPD</i>         | 19  | 38590905        | -2.3E-02       | 1.9E-01  | 2.5E-04            | -1.3E-02 | 4.7E-01  | 7.3E-05        | 3.6E-03  | 8.4E-01  | 6.0E-06        | 3.5E-03  | 8.5E-01   | 5.7E-06           | -3.0E-02 | 1.0E-01  | 4.5E-04        |
| 19.08          | rs7412     | <i>APOE - delta</i> | 19  | 50103919        | -3.6E-01       | 6.7E-47* | 2.9E-02            | -1.9E-01 | 1.2E-14* | 8.4E-03        | -5.2E-01 | 2.4E-96* | 6.0E-02        | -5.7E-01 | 2.1E-102* | 7.5E-02           | -1.2E-01 | 2.4E-06* | 3.7E-03        |
| 19.09          | rs4420638  | <i>APOEC1C2</i>     | 19  | 50114786        | 8.3E-02        | 1.2E-03  | 1.5E-03            | 9.9E-02  | 9.5E-05+ | 2.2E-03        | 2.2E-01  | 4.4E-18* | 1.1E-02        | 2.0E-01  | 9.1E-13*  | 8.5E-03           | -6.5E-02 | 1.6E-02  | 9.8E-04        |
| 19.10          | rs492602   | <i>FLJ36070</i>     | 19  | 53898229        | 3.7E-02        | 2.7E-02  | 6.9E-04            | 2.9E-02  | 7.8E-02  | 4.4E-04        | 3.3E-03  | 8.5E-01  | 5.4E-06        | -1.5E-02 | 4.1E-01   | 1.1E-04           | -1.9E-02 | 2.9E-01  | 1.9E-04        |
| 19.11          | rs17695224 | <i>HAS1</i>         | 19  | 57016028        | -2.1E-02       | 2.6E-01  | 1.8E-04            | -1.3E-02 | 4.9E-01  | 6.6E-05        | 1.7E-02  | 3.6E-01  | 1.2E-04        | 1.4E-02  | 4.8E-01   | 8.3E-05           | 1.8E-02  | 3.5E-01  | 1.5E-04        |
| 19.12          | rs386000   | <i>LILRA3</i>       | 19  | 59484573        | -1.6E-02       | 4.1E-01  | 9.5E-05            | -3.1E-02 | 1.2E-01  | 3.4E-04        | -5.0E-02 | 1.4E-02  | 8.7E-04        | -7.6E-02 | 4.8E-04   | 2.0E-03           | 6.2E-02  | 3.7E-03  | 1.4E-03        |
| 20.01          | rs364585   | <i>SPTLC3</i>       | 20  | 12910718        | 2.7E-04        | 9.9E-01  | 3.6E-08            | 1.5E-02  | 3.8E-01  | 1.1E-04        | 1.7E-02  | 3.2E-01  | 1.4E-04        | 4.2E-02  | 2.1E-02   | 8.9E-04           | -1.5E-02 | 4.1E-01  | 1.1E-04        |
| 20.02          | rs2328223  | <i>SNX5</i>         | 20  | 17793921        | 8.4E-03        | 7.0E-01  | 2.2E-05            | -1.7E-02 | 4.2E-01  | 9.2E-05        | -4.5E-03 | 8.4E-01  | 6.2E-06        | -4.5E-02 | 5.3E-02   | 6.3E-04           | 1.7E-02  | 4.7E-01  | 9.0E-05        |
| 20.03          | rs2277862  | <i>ERGIC3</i>       | 20  | 33616196        | -1.3E-02       | 5.9E-01  | 4.1E-05            | -1.7E-02 | 4.7E-01  | 7.6E-05        | -1.6E-02 | 5.0E-01  | 6.5E-05        | 2.6E-03  | 9.2E-01   | 1.7E-06           | -3.8E-02 | 1.2E-01  | 4.0E-04        |
| 20.04          | rs2902940  | <i>MAFB</i>         | 20  | 38524901        | -1.9E-02       | 3.0E-01  | 1.5E-04            | -1.8E-02 | 3.4E-01  | 1.3E-04        | -2.2E-02 | 2.4E-01  | 2.0E-04        | -3.3E-02 | 9.8E-02   | 4.6E-04           | 2.3E-02  | 2.3E-01  | 2.4E-04        |
| 20.05          | rs909802   | <i>TOP1</i>         | 20  | 39370229        | 5.7E-03        | 7.3E-01  | 1.6E-05            | -9.0E-03 | 6.0E-01  | 4.0E-05        | -4.6E-03 | 7.9E-01  | 1.1E-05        | 1.3E-02  | 4.7E-01   | 8.6E-05           | -7.6E-03 | 6.7E-01  | 3.1E-05        |
| 20.06          | rs1800961  | <i>HNF4A</i>        | 20  | 42475778        | -9.1E-02       | 7.1E-02  | 4.6E-04            | 2.6E-02  | 6.1E-01  | 3.8E-05        | 3.3E-02  | 5.2E-01  | 5.9E-05        | 2.8E-02  | 6.1E-01   | 4.3E-05           | 2.8E-02  | 6.0E-01  | 4.6E-05        |
| 20.07          | rs6065906  | <i>PLTP</i>         | 20  | 43987422        | 1.4E-02        | 5.2E-01  | 5.8E-05            | 4.6E-02  | 3.5E-02  | 6.3E-04        | 3.4E-02  | 1.2E-01  | 3.4E-04        | 4.4E-02  | 6.0E-02   | 6.0E-04           | -6.3E-02 | 5.5E-03  | 1.3E-03        |
| 22.01          | rs181362   | <i>UBE2L3</i>       | 22  | 20262068        | 1.2E-03        | 9.5E-01  | 4.9E-07            | -2.1E-03 | 9.2E-01  | 1.5E-06        | 1.4E-02  | 5.2E-01  | 5.9E-05        | 3.2E-02  | 1.6E-01   | 3.3E-04           | -1.1E-02 | 6.0E-01  | 4.5E-05        |
| 22.02          | rs5763662  | <i>MTMR3</i>        | 22  | 28708703        | 9.6E-02        | 7.3E-02  | 4.6E-04            | 1.0E-01  | 5.2E-02  | 5.4E-04        | 1.3E-01  | 2.0E-02  | 7.7E-04        | 5.7E-02  | 3.3E-01   | 1.6E-04           | -1.1E-01 | 6.6E-02  | 5.7E-04        |
| 22.03          | rs138777   | <i>TOM1</i>         | 22  | 34041098        | 1.4E-02        | 4.2E-01  | 9.2E-05            | 2.2E-02  | 2.0E-01  | 2.3E-04        | 3.3E-02  | 6.0E-02  | 5.0E-04        | 1.1E-02  | 5.5E-01   | 5.9E-05           | 1.6E-02  | 3.8E-01  | 1.3E-04        |
| 22.04          | rs5756931  | <i>PLA2G6</i>       | 22  | 36875979        | 5.5E-03        | 7.5E-01  | 1.4E-05            | -1.3E-02 | 4.4E-01  | 8.6E-05        | -1.1E-02 | 5.2E-01  | 6.0E-05        | -7.2E-03 | 7.0E-01   | 2.5E-05           | 2.6E-02  | 1.5E-01  | 3.5E-04        |
| 22.05          | rs4253772  | <i>PPARA</i>        | 22  | 45006267        | -2.2E-02       | 4.2E-01  | 9.3E-05            | -2.2E-02 | 4.1E-01  | 9.8E-05        | -3.1E-03 | 9.1E-01  | 1.8E-06        | -1.9E-03 | 9.5E-01   | 7.3E-07           | 2.1E-02  | 4.6E-01  | 9.3E-05        |

Cluster number: unique numeric identifier for each of the SNPs in the analysis

rsID: SNP name

Chr: chromosome

Beta (q): Beta-coefficient from inverse-quantile transformed data

R<sup>2</sup>: variance explained by SNP

\*: indicates locus meeting both Bonferroni (p<6.25e-5) and false discovery rate (FDR<0.05) thresholds for association with baseline lipid levels

+: indicates locus meeting false discovery rate (FDR<0.05) thresholds for association with baseline lipid levels

**Supplemental Table 6a:** Association results for index variants in each candidate region tested and association with absolute change in LDL-C, non-HDL-C, apo B, LDL-P and LDL-size among the rosuvastatin allocated arm only.

| Cluster number | rsID       | Locus Name           | Chr | Position (hg18) | LDL-C    |         |                | non-HDL-C |         |                | apo B    |         |                | LDL-P    |         |                | LDL-size |         |                |
|----------------|------------|----------------------|-----|-----------------|----------|---------|----------------|-----------|---------|----------------|----------|---------|----------------|----------|---------|----------------|----------|---------|----------------|
|                |            |                      |     |                 | Beta (q) | P-value | R <sup>2</sup> | Beta (q)  | P-value | R <sup>2</sup> | Beta (q) | P-value | R <sup>2</sup> | Beta (q) | P-value | R <sup>2</sup> | Beta (q) | P-value | R <sup>2</sup> |
| 1.01           | rs1077514  | <i>ASAP3</i>         | 1   | 23638820        | -4.1E-02 | 2.3E-01 | 4.2E-04        | -4.2E-02  | 2.2E-01 | 4.2E-04        | -5.4E-02 | 1.2E-01 | 6.9E-04        | -3.1E-02 | 4.3E-01 | 2.3E-04        | -5.3E-03 | 8.9E-01 | 6.9E-06        |
| 1.02           | rs12027135 | <i>LDLRAP1</i>       | 1   | 25648320        | 2.2E-02  | 3.5E-01 | 2.5E-04        | 2.4E-02   | 3.1E-01 | 2.9E-04        | -1.1E-02 | 6.3E-01 | 6.6E-05        | -3.8E-02 | 1.7E-01 | 7.1E-04        | -2.7E-02 | 3.2E-01 | 3.8E-04        |
| 1.03           | rs12748152 | <i>PIGV-NROB2</i>    | 1   | 27010980        | 5.7E-02  | 2.1E-01 | 4.5E-04        | 4.3E-02   | 3.4E-01 | 2.6E-04        | 7.5E-03  | 8.7E-01 | 7.5E-06        | -8.1E-03 | 8.8E-01 | 8.7E-06        | -4.1E-02 | 4.4E-01 | 2.3E-04        |
| 1.04           | rs4660293  | <i>PABPC4</i>        | 1   | 39800767        | -1.1E-02 | 7.0E-01 | 4.3E-05        | -2.4E-02  | 3.8E-01 | 2.2E-04        | -2.7E-02 | 3.4E-01 | 2.6E-04        | -9.8E-03 | 7.6E-01 | 3.6E-05        | -6.3E-02 | 4.9E-02 | 1.5E-03        |
| 1.05           | rs2479409  | <i>PCSK9</i>         | 1   | 55277238        | 8.8E-04  | 9.7E-01 | 3.6E-07        | -2.2E-03  | 9.3E-01 | 2.3E-06        | 1.3E-03  | 9.6E-01 | 7.3E-07        | 4.1E-03  | 8.9E-01 | 7.4E-06        | 1.3E-02  | 6.5E-01 | 7.9E-05        |
| 1.06           | rs17111584 | <i>PCSK9 - delta</i> | 1   | 55319284        | 2.1E-01  | 1.1E-04 | 4.3E-03        | 1.8E-01   | 1.2E-03 | 3.0E-03        | 1.3E-01  | 1.6E-02 | 1.7E-03        | 3.1E-02  | 6.2E-01 | 9.1E-05        | 1.4E-02  | 8.3E-01 | 1.8E-05        |
| 1.07           | rs2131925  | <i>ANGPTL3</i>       | 1   | 62798530        | 2.4E-02  | 3.1E-01 | 3.0E-04        | 3.8E-02   | 1.2E-01 | 7.0E-04        | 5.3E-02  | 3.1E-02 | 1.3E-03        | 4.4E-02  | 1.1E-01 | 9.3E-04        | -4.3E-02 | 1.2E-01 | 9.1E-04        |
| 1.08           | rs7515577  | <i>EVIS</i>          | 1   | 92782026        | -8.1E-03 | 7.7E-01 | 2.4E-05        | -2.9E-02  | 3.0E-01 | 3.0E-04        | -4.5E-02 | 1.2E-01 | 6.9E-04        | -8.5E-02 | 9.1E-03 | 2.5E-03        | 3.6E-03  | 9.1E-01 | 4.5E-06        |
| 1.09           | rs629301   | <i>SORT1</i>         | 1   | 109619829       | -4.7E-02 | 7.8E-02 | 8.9E-04        | -7.6E-02  | 4.1E-03 | 2.3E-03        | -3.5E-02 | 1.9E-01 | 4.8E-04        | -2.1E-02 | 4.9E-01 | 1.8E-04        | 1.8E-02  | 5.7E-01 | 1.2E-04        |
| 1.10           | rs267733   | <i>ANXA9-CERS2</i>   | 1   | 149225460       | 1.1E-02  | 7.2E-01 | 3.7E-05        | 1.7E-02   | 5.8E-01 | 8.8E-05        | 7.9E-03  | 8.0E-01 | 1.8E-05        | -8.9E-03 | 8.0E-01 | 2.3E-05        | -1.4E-02 | 7.0E-01 | 5.7E-05        |
| 1.11           | rs12145743 | <i>HDBG-PMVK</i>     | 1   | 154967275       | -6.1E-03 | 8.0E-01 | 1.8E-05        | -5.3E-03  | 8.3E-01 | 1.3E-05        | -1.3E-03 | 9.6E-01 | 7.5E-07        | 3.0E-02  | 2.9E-01 | 4.2E-04        | -1.5E-02 | 5.9E-01 | 1.1E-04        |
| 1.12           | rs4650994  | <i>ANGPTL1</i>       | 1   | 176781935       | -2.8E-03 | 9.0E-01 | 4.1E-06        | -1.2E-02  | 6.1E-01 | 7.5E-05        | -1.9E-02 | 4.3E-01 | 1.8E-04        | -1.0E-02 | 7.0E-01 | 5.5E-05        | 3.0E-02  | 2.7E-01 | 4.6E-04        |
| 1.13           | rs1689800  | <i>ZNF648</i>        | 1   | 180435508       | -1.9E-03 | 9.4E-01 | 1.7E-06        | -2.7E-03  | 9.1E-01 | 3.6E-06        | 1.3E-02  | 5.8E-01 | 8.7E-05        | -4.0E-03 | 8.9E-01 | 7.6E-06        | -2.1E-02 | 4.6E-01 | 2.1E-04        |
| 1.14           | rs2807834  | <i>MOSC1</i>         | 1   | 219037216       | -6.1E-03 | 8.1E-01 | 1.7E-05        | -2.9E-02  | 2.4E-01 | 3.9E-04        | -5.3E-02 | 3.6E-02 | 1.3E-03        | -1.4E-02 | 6.3E-01 | 8.7E-05        | 2.0E-02  | 4.9E-01 | 1.9E-04        |
| 1.15           | rs4846914  | <i>GALNT2</i>        | 1   | 228362314       | 5.7E-03  | 8.1E-01 | 1.6E-05        | -1.4E-02  | 5.5E-01 | 1.0E-04        | 2.6E-03  | 9.1E-01 | 3.4E-06        | -6.3E-03 | 8.2E-01 | 1.9E-05        | 6.1E-02  | 2.8E-02 | 1.8E-03        |
| 1.16           | rs514230   | <i>IRF2BP2</i>       | 1   | 232925220       | 1.0E-02  | 6.6E-01 | 5.7E-05        | 2.1E-02   | 3.7E-01 | 2.3E-04        | 2.6E-02  | 2.8E-01 | 3.4E-04        | 3.0E-02  | 2.6E-01 | 4.7E-04        | -5.4E-02 | 4.6E-02 | 1.5E-03        |
| 2.01           | rs1367117  | <i>APOB</i>          | 2   | 21117405        | -1.5E-02 | 5.5E-01 | 1.0E-04        | -1.3E-02  | 6.3E-01 | 6.7E-05        | -1.2E-02 | 6.6E-01 | 5.7E-05        | 2.0E-02  | 5.1E-01 | 1.6E-04        | 1.4E-02  | 6.5E-01 | 7.9E-05        |
| 2.02           | rs1260326  | <i>GCKR</i>          | 2   | 27584444        | 2.5E-03  | 9.1E-01 | 3.3E-06        | -4.1E-02  | 8.6E-02 | 8.4E-04        | -3.8E-02 | 1.1E-01 | 7.3E-04        | -6.9E-02 | 1.2E-02 | 2.4E-03        | 3.1E-02  | 2.6E-01 | 4.9E-04        |
| 2.03           | rs4299376  | <i>ABCG5-8</i>       | 2   | 43926080        | 1.9E-02  | 4.5E-01 | 1.6E-04        | 2.0E-02   | 4.3E-01 | 1.8E-04        | -8.7E-03 | 7.4E-01 | 3.3E-05        | 1.8E-02  | 5.4E-01 | 1.4E-04        | 1.2E-02  | 6.7E-01 | 6.9E-05        |
| 2.04           | rs2710642  | <i>EHBP1</i>         | 2   | 63003061        | -3.7E-02 | 1.3E-01 | 6.6E-04        | -4.2E-02  | 9.0E-02 | 8.2E-04        | -3.9E-02 | 1.2E-01 | 6.8E-04        | -2.7E-02 | 3.5E-01 | 3.2E-04        | -1.5E-02 | 6.0E-01 | 1.1E-04        |
| 2.05           | rs10490626 | <i>INSIG2</i>        | 2   | 118552311       | 4.4E-03  | 9.1E-01 | 3.4E-06        | -1.0E-02  | 8.0E-01 | 1.8E-05        | 3.5E-04  | 9.9E-01 | 2.0E-08        | -2.8E-02 | 5.6E-01 | 1.2E-04        | 5.3E-02  | 2.7E-01 | 4.7E-04        |
| 2.06           | rs2030746  | <i>LOC84931</i>      | 2   | 121025958       | -7.6E-03 | 7.5E-01 | 2.8E-05        | -3.5E-02  | 1.5E-01 | 5.9E-04        | -4.5E-03 | 8.6E-01 | 9.5E-06        | 3.9E-03  | 8.9E-01 | 7.5E-06        | -3.9E-03 | 8.9E-01 | 7.3E-06        |
| 2.07           | rs6759321  | <i>RABGAP1</i>       | 2   | 136039146       | -2.0E-02 | 4.3E-01 | 1.8E-04        | -3.0E-02  | 2.4E-01 | 3.9E-04        | -2.4E-02 | 3.6E-01 | 2.4E-04        | -5.9E-02 | 4.7E-02 | 1.5E-03        | 1.9E-02  | 5.3E-01 | 1.5E-04        |
| 2.08           | rs10195252 | <i>COBLL1</i>        | 2   | 165221337       | -3.5E-03 | 8.8E-01 | 6.1E-06        | 3.1E-03   | 9.0E-01 | 4.7E-06        | -4.4E-02 | 7.4E-02 | 9.2E-04        | -3.2E-02 | 2.5E-01 | 4.8E-04        | 1.2E-02  | 6.7E-01 | 7.0E-05        |
| 2.09           | rs2287623  | <i>ABCB11</i>        | 2   | 169538401       | -8.5E-03 | 7.2E-01 | 3.6E-05        | -1.9E-02  | 4.3E-01 | 1.8E-04        | -5.7E-03 | 8.1E-01 | 1.6E-05        | 2.7E-02  | 3.2E-01 | 3.6E-04        | -4.1E-03 | 8.8E-01 | 8.2E-06        |
| 2.10           | rs11694172 | <i>FAM117B</i>       | 2   | 203240549       | 2.2E-02  | 4.1E-01 | 1.9E-04        | 1.2E-02   | 6.6E-01 | 5.6E-05        | 2.9E-02  | 3.0E-01 | 3.1E-04        | -2.7E-04 | 9.9E-01 | 2.8E-08        | -8.1E-02 | 1.1E-02 | 2.5E-03        |
| 2.11           | rs1250229  | <i>FNI</i>           | 2   | 216012629       | -7.6E-03 | 7.8E-01 | 2.3E-05        | 4.1E-03   | 8.8E-01 | 6.6E-06        | -2.1E-02 | 4.4E-01 | 1.7E-04        | 5.2E-03  | 8.7E-01 | 1.1E-05        | -1.2E-02 | 6.9E-01 | 6.0E-05        |
| 2.12           | rs2943645  | <i>IRS1</i>          | 2   | 226807424       | -4.0E-02 | 9.4E-02 | 8.0E-04        | -1.3E-02  | 5.9E-01 | 8.4E-05        | -2.9E-02 | 2.2E-01 | 4.3E-04        | -4.5E-02 | 1.1E-01 | 9.7E-04        | 4.8E-02  | 8.4E-02 | 1.1E-03        |
| 2.13           | rs11563251 | <i>UGT1A1</i>        | 2   | 234344123       | -2.3E-03 | 9.5E-01 | 1.2E-06        | 9.3E-03   | 8.0E-01 | 1.8E-05        | 6.0E-02  | 1.1E-01 | 7.4E-04        | 7.4E-02  | 7.4E-02 | 1.2E-03        | 3.7E-02  | 3.8E-01 | 3.0E-04        |
| 3.01           | rs2606736  | <i>ATG7</i>          | 3   | 11375249        | -1.1E-02 | 6.4E-01 | 6.1E-05        | 1.3E-03   | 9.6E-01 | 8.0E-07        | -8.9E-03 | 7.2E-01 | 3.7E-05        | -1.3E-02 | 6.5E-01 | 7.4E-05        | -3.6E-02 | 2.1E-01 | 5.9E-04        |
| 3.02           | rs2290159  | <i>RAF1</i>          | 3   | 12603920        | -5.0E-02 | 7.2E-02 | 9.2E-04        | -2.7E-02  | 3.3E-01 | 2.7E-04        | -3.0E-04 | 9.9E-01 | 3.2E-08        | -4.1E-02 | 2.1E-01 | 5.8E-04        | -7.7E-03 | 8.1E-01 | 2.1E-05        |
| 3.03           | rs7640978  | <i>CMTM6</i>         | 3   | 32508014        | -3.1E-02 | 4.1E-01 | 1.9E-04        | -6.7E-02  | 7.5E-02 | 9.0E-04        | -4.6E-02 | 2.3E-01 | 4.1E-04        | 5.0E-03  | 9.1E-01 | 4.7E-06        | 1.4E-02  | 7.5E-01 | 3.9E-05        |
| 3.04           | rs2290547  | <i>SETD2</i>         | 3   | 47036187        | 8.5E-03  | 7.8E-01 | 2.3E-05        | 5.7E-03   | 8.5E-01 | 1.0E-05        | -2.4E-02 | 4.4E-01 | 1.7E-04        | -2.2E-02 | 5.2E-01 | 1.5E-04        | -1.3E-02 | 7.2E-01 | 5.0E-05        |
| 3.05           | rs2013208  | <i>RBM5</i>          | 3   | 50104403        | -2.5E-02 | 2.9E-01 | 3.2E-04        | -1.2E-02  | 6.2E-01 | 7.0E-05        | 2.5E-02  | 3.0E-01 | 3.1E-04        | 1.0E-02  | 7.0E-01 | 5.5E-05        | -1.4E-02 | 5.9E-01 | 1.1E-04        |
| 3.06           | rs13326165 | <i>STAB1</i>         | 3   | 52507158        | -4.4E-03 | 8.8E-01 | 6.8E-06        | 4.4E-02   | 1.2E-01 | 6.7E-04        | 5.6E-02  | 5.2E-02 | 1.1E-03        | 3.9E-02  | 2.4E-01 | 5.1E-04        | -5.1E-02 | 1.2E-01 | 9.0E-04        |
| 3.07           | rs13315871 | <i>PXK</i>           | 3   | 58356327        | -8.3E-02 | 4.4E-02 | 1.2E-03        | -8.7E-02  | 3.3E-02 | 1.3E-03        | -7.2E-02 | 8.5E-02 | 8.5E-04        | -2.7E-02 | 5.7E-01 | 1.2E-04        | 1.7E-02  | 7.2E-01 | 4.9E-05        |
| 3.08           | rs6805251  | <i>GSK3B</i>         | 3   | 121043296       | -5.1E-02 | 3.2E-02 | 1.3E-03        | -7.7E-02  | 1.3E-03 | 2.9E-03        | -7.1E-02 | 3.6E-03 | 2.4E-03        | -5.9E-02 | 3.3E-02 | 1.7E-03        | 4.7E-02  | 8.7E-02 | 1.1E-03        |
| 3.09           | rs17404153 | <i>ACAD11</i>        | 3   | 133645890       | 5.3E-02  | 1.3E-01 | 6.7E-04        | 3.0E-02   | 3.9E-01 | 2.1E-04        | 1.2E-02  | 7.4E-01 | 3.1E-05        | 6.1E-02  | 1.3E-01 | 8.4E-04        | 6.2E-02  | 1.3E-01 | 8.7E-04        |
| 3.10           | rs645040   | <i>MSL2L1</i>        | 3   | 137409312       | 6.6E-02  | 1.6E-02 | 1.7E-03        | 4.9E-02   | 7.6E-02 | 9.0E-04        | 2.8E-02  | 3.3E-01 | 2.8E-04        | -2.6E-02 | 4.1E-01 | 2.5E-04        | 4.7E-02  | 1.5E-01 | 8.1E-04        |
| 4.01           | rs6831256  | <i>LRPAP1</i>        | 4   | 3442937         | -3.0E-02 | 2.1E-01 | 4.5E-04        | -3.6E-02  | 1.3E-01 | 6.6E-04        | -5.2E-03 | 8.3E-01 | 1.3E-05        | 2.7E-03  | 9.2E-01 | 3.6E-06        | 3.6E-02  | 1.9E-01 | 6.5E-04        |
| 4.02           | rs10019888 | <i>C4orf52</i>       | 4   | 25672088        | 1.7E-03  | 9.6E-01 | 8.0E-07        | 5.4E-03   | 8.6E-01 | 8.5E-06        | -5.5E-03 | 8.6E-01 | 8.7E-06        | 3.7E-02  | 3.2E-01 | 3.7E-04        | 2.6E-02  | 4.8E-01 | 1.9E-04        |
| 4.03           | rs442177   | <i>KLHL8</i>         | 4   | 88249285        | -2.4E-02 | 3.1E-01 | 3.0E-04        | -1.6E-02  | 4.9E-01 | 1.3E-04        | -1.4E-02 | 5.6E-01 | 9.6E-05        | -7.1E-03 | 8.0E-01 | 2.4E-05        | -3.9E-03 | 8.9E-01 | 7.2E-06        |
| 4.04           | rs2199936  | <i>ABCG2 - delta</i> | 4   | 89264355        | -2.7E-01 | 8.8E-13 | 1.4E-02        | -2.9E-01  | 1.6E-14 | 1.7E-02        | -2.5E-01 | 3.6E-11 | 1.2E-02        | -1.7E-01 | 7.4E-05 | 5.8E-03        | -8.2E-02 | 5.9E-02 | 1.4E-03        |
| 4.05           | rs3822072  | <i>FAM13A1</i>       | 4   | 89960292        | 3.3E-02  | 1.5E-01 | 6.0E-04        | 1.1E-02   | 6.3E-01 | 6.5E-05        | -1.6E-02 | 4.9E-01 | 1.3E-04        | -2.4E-02 | 3.7E-01 | 3.0E-04        | 4.5E-02  | 9.0E-02 | 1.1E-03        |

| Cluster number | rsID       | Locus Name          | Chr | Position (hg18) | LDL-C    |         |                | non-HDL-C |         |                | apo B    |         |                | LDL-P    |         |                | LDL-size |         |                |
|----------------|------------|---------------------|-----|-----------------|----------|---------|----------------|-----------|---------|----------------|----------|---------|----------------|----------|---------|----------------|----------|---------|----------------|
|                |            |                     |     |                 | Beta (q) | P-value | R <sup>2</sup> | Beta (q)  | P-value | R <sup>2</sup> | Beta (q) | P-value | R <sup>2</sup> | Beta (q) | P-value | R <sup>2</sup> | Beta (q) | P-value | R <sup>2</sup> |
| 4.06           | rs2602836  | <i>ADH5</i>         | 4   | 100233828       | 2.0E-02  | 3.9E-01 | 2.1E-04        | 5.0E-02   | 3.3E-02 | 1.3E-03        | 4.4E-02  | 6.4E-02 | 9.9E-04        | 6.1E-02  | 2.4E-02 | 1.9E-03        | -1.9E-02 | 4.8E-01 | 1.9E-04        |
| 4.07           | rs13107325 | <i>SLC39A8</i>      | 4   | 103407732       | -3.3E-02 | 4.2E-01 | 1.9E-04        | -4.4E-02  | 2.8E-01 | 3.3E-04        | 1.0E-02  | 8.1E-01 | 1.7E-05        | 3.0E-02  | 5.3E-01 | 1.5E-04        | -6.2E-02 | 2.0E-01 | 6.3E-04        |
| 5.01           | rs6450176  | <i>ARL15</i>        | 5   | 53333782        | 7.4E-03  | 8.0E-01 | 1.8E-05        | 2.8E-04   | 9.9E-01 | 2.6E-08        | 9.1E-03  | 7.6E-01 | 2.6E-05        | 2.1E-02  | 5.5E-01 | 1.4E-04        | 3.7E-02  | 3.0E-01 | 4.1E-04        |
| 5.02           | rs9686661  | <i>MAP3K1</i>       | 5   | 55897543        | -1.1E-02 | 7.2E-01 | 3.7E-05        | -2.5E-02  | 4.0E-01 | 2.0E-04        | -1.7E-02 | 5.8E-01 | 8.9E-05        | -1.4E-02 | 6.8E-01 | 6.3E-05        | 7.2E-02  | 4.1E-02 | 1.6E-03        |
| 5.03           | rs12916    | <i>HMGCGR</i>       | 5   | 74692295        | 1.3E-02  | 5.9E-01 | 8.3E-05        | 2.3E-02   | 3.4E-01 | 2.6E-04        | -1.2E-02 | 6.2E-01 | 6.9E-05        | -9.6E-03 | 7.3E-01 | 4.5E-05        | 1.3E-03  | 9.6E-01 | 8.2E-07        |
| 5.04           | rs4530754  | <i>CSNK1G3</i>      | 5   | 122883315       | -9.2E-03 | 6.9E-01 | 4.5E-05        | -1.4E-02  | 5.5E-01 | 1.0E-04        | -8.5E-03 | 7.2E-01 | 3.7E-05        | 2.0E-02  | 4.6E-01 | 2.1E-04        | -4.7E-02 | 8.2E-02 | 1.2E-03        |
| 5.05           | rs6882076  | <i>TIMD4</i>        | 5   | 156322875       | -1.1E-02 | 6.3E-01 | 6.6E-05        | -1.1E-02  | 6.5E-01 | 6.0E-05        | 2.9E-02  | 2.2E-01 | 4.3E-04        | 7.2E-03  | 7.9E-01 | 2.5E-05        | -1.7E-02 | 5.4E-01 | 1.4E-04        |
| 6.01           | rs3757354  | <i>MYLIP</i>        | 6   | 16235386        | 7.9E-02  | 4.1E-03 | 2.4E-03        | 5.9E-02   | 3.3E-02 | 1.3E-03        | 4.1E-02  | 1.5E-01 | 6.1E-04        | 5.2E-02  | 1.0E-01 | 9.8E-04        | 2.6E-02  | 4.2E-01 | 2.5E-04        |
| 6.02           | rs1800562  | <i>HFE</i>          | 6   | 26201120        | 3.0E-02  | 5.0E-01 | 1.3E-04        | -5.3E-03  | 9.0E-01 | 4.1E-06        | -3.1E-02 | 4.9E-01 | 1.4E-04        | -2.1E-02 | 6.7E-01 | 6.7E-05        | -7.4E-03 | 8.8E-01 | 8.3E-06        |
| 6.03           | rs3177928  | <i>HLA</i>          | 6   | 32520413        | -2.3E-02 | 4.9E-01 | 1.4E-04        | -4.0E-02  | 2.3E-01 | 4.1E-04        | -1.7E-03 | 9.6E-01 | 7.2E-07        | 8.6E-03  | 8.2E-01 | 1.9E-05        | 5.5E-02  | 1.5E-01 | 7.9E-04        |
| 6.04           | rs2814982  | <i>C6orf106</i>     | 6   | 34654538        | 2.4E-02  | 5.3E-01 | 1.1E-04        | 3.1E-02   | 4.1E-01 | 1.9E-04        | -1.3E-02 | 7.4E-01 | 3.0E-05        | 2.7E-02  | 5.5E-01 | 1.3E-04        | 3.5E-02  | 4.4E-01 | 2.3E-04        |
| 6.05           | rs2758886  | <i>KCNK17</i>       | 6   | 39358815        | 1.6E-02  | 5.3E-01 | 1.1E-04        | 2.2E-02   | 3.9E-01 | 2.1E-04        | 1.2E-02  | 6.6E-01 | 5.6E-05        | 2.3E-02  | 4.5E-01 | 2.1E-04        | -2.3E-02 | 4.4E-01 | 2.3E-04        |
| 6.06           | rs998584   | <i>VEGFA</i>        | 6   | 43865874        | 1.8E-02  | 4.3E-01 | 1.8E-04        | 1.9E-02   | 4.2E-01 | 1.8E-04        | 2.8E-02  | 2.4E-01 | 4.0E-04        | -8.1E-03 | 7.6E-01 | 3.4E-05        | 9.2E-02  | 6.9E-04 | 4.4E-03        |
| 6.07           | rs9488822  | <i>FRK</i>          | 6   | 116419586       | -2.1E-02 | 3.8E-01 | 2.2E-04        | -2.9E-02  | 2.2E-01 | 4.3E-04        | -4.7E-03 | 8.5E-01 | 1.1E-05        | -1.7E-02 | 5.4E-01 | 1.4E-04        | 1.1E-03  | 9.7E-01 | 6.3E-07        |
| 6.08           | rs1936800  | <i>RSPO3</i>        | 6   | 127477757       | 2.5E-02  | 2.9E-01 | 3.3E-04        | 1.9E-02   | 4.2E-01 | 1.9E-04        | -8.1E-03 | 7.4E-01 | 3.3E-05        | -3.1E-02 | 2.5E-01 | 4.8E-04        | -2.7E-02 | 3.2E-01 | 3.8E-04        |
| 6.09           | rs9376090  | <i>HBS1L</i>        | 6   | 135452921       | -4.4E-02 | 1.0E-01 | 7.7E-04        | -3.1E-02  | 2.5E-01 | 3.8E-04        | -3.9E-02 | 1.5E-01 | 5.8E-04        | -3.9E-02 | 2.1E-01 | 5.9E-04        | 1.1E-02  | 7.2E-01 | 4.9E-05        |
| 6.10           | rs605066   | <i>CITED2</i>       | 6   | 139871359       | -4.9E-02 | 3.8E-02 | 1.2E-03        | -6.6E-02  | 5.3E-03 | 2.2E-03        | -5.1E-02 | 3.4E-02 | 1.3E-03        | -3.0E-02 | 2.8E-01 | 4.4E-04        | -7.7E-03 | 7.8E-01 | 3.1E-05        |
| 6.11           | rs1564348  | <i>LPA</i>          | 6   | 160498850       | 4.3E-02  | 1.9E-01 | 4.8E-04        | 4.3E-02   | 1.9E-01 | 4.9E-04        | -2.2E-03 | 9.5E-01 | 1.3E-06        | 4.5E-02  | 2.4E-01 | 5.2E-04        | -4.4E-02 | 2.4E-01 | 5.2E-04        |
| 6.12           | rs10455872 | <i>LPA - delta</i>  | 6   | 160930108       | 3.2E-01  | 1.2E-10 | 1.2E-02        | 3.1E-01   | 4.0E-10 | 1.1E-02        | 3.1E-01  | 1.7E-09 | 1.0E-02        | 2.3E-01  | 5.0E-05 | 6.1E-03        | 5.2E-02  | 3.7E-01 | 3.1E-04        |
| 7.01           | rs1997243  | <i>GPR146</i>       | 7   | 1050303         | 4.7E-03  | 8.8E-01 | 6.6E-06        | -3.0E-02  | 3.5E-01 | 2.5E-04        | -1.6E-02 | 6.2E-01 | 7.2E-05        | -4.0E-02 | 2.7E-01 | 4.6E-04        | -2.6E-02 | 4.8E-01 | 1.9E-04        |
| 7.02           | rs702485   | <i>DAGLB</i>        | 7   | 6415797         | -9.7E-04 | 9.7E-01 | 5.1E-07        | 1.3E-02   | 5.8E-01 | 8.6E-05        | 1.6E-02  | 4.9E-01 | 1.4E-04        | 6.2E-03  | 8.2E-01 | 2.0E-05        | 2.6E-02  | 3.4E-01 | 3.4E-04        |
| 7.03           | rs4142995  | <i>SNX13</i>        | 7   | 17885783        | -1.9E-02 | 4.2E-01 | 1.8E-04        | -1.3E-02  | 5.7E-01 | 9.0E-05        | -7.5E-03 | 7.5E-01 | 2.8E-05        | -1.0E-02 | 7.1E-01 | 5.1E-05        | -3.6E-02 | 2.0E-01 | 6.3E-04        |
| 7.04           | rs2285942  | <i>DNAH11</i>       | 7   | 21549442        | -5.1E-02 | 1.3E-01 | 6.5E-04        | -5.0E-02  | 1.4E-01 | 6.1E-04        | -4.4E-02 | 2.0E-01 | 4.6E-04        | -2.2E-02 | 5.7E-01 | 1.2E-04        | -8.2E-04 | 9.8E-01 | 1.6E-07        |
| 7.05           | rs4722551  | <i>MIR148A</i>      | 7   | 25958351        | -1.0E-02 | 7.5E-01 | 2.9E-05        | -7.2E-03  | 8.2E-01 | 1.5E-05        | -3.0E-03 | 9.2E-01 | 2.5E-06        | 1.2E-02  | 7.5E-01 | 3.9E-05        | 1.9E-02  | 6.1E-01 | 1.0E-04        |
| 7.06           | rs2072183  | <i>NPC1L1</i>       | 7   | 44545705        | -5.0E-05 | 0.99    | 8.3E-10        | 3.3E-02   | 2.6E-01 | 3.6E-04        | 3.3E-02  | 2.6E-01 | 3.6E-04        | 2.2E-02  | 5.2E-01 | 1.6E-04        | -1.8E-02 | 6.0E-01 | 1.0E-04        |
| 7.07           | rs4917014  | <i>IKZF1</i>        | 7   | 50276409        | -8.7E-03 | 7.3E-01 | 3.5E-05        | -7.8E-03  | 7.6E-01 | 2.8E-05        | -1.3E-02 | 6.0E-01 | 7.8E-05        | 2.5E-02  | 3.9E-01 | 2.7E-04        | -3.8E-02 | 1.9E-01 | 6.6E-04        |
| 7.08           | rs7811265  | <i>MLXIPL</i>       | 7   | 72572446        | 2.6E-02  | 3.8E-01 | 2.2E-04        | 2.5E-02   | 3.9E-01 | 2.1E-04        | 1.5E-02  | 6.2E-01 | 7.0E-05        | 2.6E-02  | 4.3E-01 | 2.3E-04        | -2.3E-02 | 4.9E-01 | 1.8E-04        |
| 7.09           | rs38855    | <i>MET</i>          | 7   | 116145280       | 1.8E-02  | 4.4E-01 | 1.7E-04        | 2.7E-02   | 2.5E-01 | 3.7E-04        | 1.2E-02  | 6.2E-01 | 7.0E-05        | -2.0E-02 | 4.6E-01 | 2.0E-04        | 3.4E-02  | 2.1E-01 | 6.1E-04        |
| 7.10           | rs4731702  | <i>KLF14</i>        | 7   | 130083924       | 2.5E-02  | 2.7E-01 | 3.4E-04        | 1.6E-02   | 4.8E-01 | 1.4E-04        | 2.1E-02  | 3.8E-01 | 2.2E-04        | 1.5E-02  | 5.9E-01 | 1.1E-04        | 1.8E-02  | 5.0E-01 | 1.8E-04        |
| 7.11           | rs17173637 | <i>TMEM176A</i>     | 7   | 150160382       | -1.3E-02 | 7.5E-01 | 2.8E-05        | -9.6E-03  | 8.2E-01 | 1.5E-05        | 1.7E-02  | 6.9E-01 | 4.6E-05        | 2.3E-02  | 6.4E-01 | 8.3E-05        | -7.3E-02 | 1.3E-01 | 8.9E-04        |
| 8.01           | rs9987289  | <i>PPP1R3B</i>      | 8   | 9220768         | -9.1E-04 | 9.8E-01 | 1.4E-07        | -1.8E-02  | 6.6E-01 | 5.5E-05        | -4.5E-02 | 2.8E-01 | 3.3E-04        | -6.3E-02 | 1.7E-01 | 6.8E-04        | 3.9E-02  | 4.0E-01 | 2.7E-04        |
| 8.02           | rs11776767 | <i>PINX1</i>        | 8   | 10721339        | -6.3E-03 | 7.9E-01 | 2.0E-05        | -1.9E-02  | 4.4E-01 | 1.7E-04        | -3.0E-02 | 2.1E-01 | 4.4E-04        | -1.8E-02 | 5.1E-01 | 1.6E-04        | 2.8E-02  | 3.1E-01 | 3.9E-04        |
| 8.03           | rs1495743  | <i>NAT2</i>         | 8   | 18317580        | -2.4E-03 | 9.3E-01 | 2.2E-06        | -7.3E-03  | 7.9E-01 | 2.0E-05        | 7.3E-03  | 8.0E-01 | 1.9E-05        | 3.8E-03  | 9.1E-01 | 5.1E-06        | 9.7E-03  | 7.7E-01 | 3.3E-05        |
| 8.04           | rs12678919 | <i>LPL</i>          | 8   | 19888502        | 3.2E-03  | 9.3E-01 | 2.0E-06        | 6.2E-02   | 1.1E-01 | 7.2E-04        | 6.5E-02  | 1.0E-01 | 7.8E-04        | 1.9E-02  | 6.7E-01 | 6.6E-05        | -7.2E-02 | 1.1E-01 | 9.7E-04        |
| 8.05           | rs10102164 | <i>SOX17</i>        | 8   | 55584167        | -2.6E-02 | 3.8E-01 | 2.2E-04        | -2.8E-02  | 3.5E-01 | 2.5E-04        | -2.7E-02 | 3.6E-01 | 2.4E-04        | -5.0E-02 | 1.4E-01 | 8.1E-04        | 2.0E-02  | 5.5E-01 | 1.4E-04        |
| 8.06           | rs1030431  | <i>CYP7A1</i>       | 8   | 59474251        | -2.7E-02 | 2.8E-01 | 3.3E-04        | -3.0E-02  | 2.3E-01 | 4.1E-04        | -1.2E-02 | 6.4E-01 | 6.3E-05        | 6.1E-03  | 8.4E-01 | 1.6E-05        | 1.2E-02  | 6.7E-01 | 6.8E-05        |
| 8.07           | rs2293889  | <i>TRPS1</i>        | 8   | 116668374       | 6.0E-02  | 9.7E-03 | 1.9E-03        | 6.3E-02   | 7.0E-03 | 2.1E-03        | 7.4E-02  | 1.7E-03 | 2.8E-03        | 2.7E-02  | 3.2E-01 | 3.7E-04        | 1.4E-02  | 6.0E-01 | 1.0E-04        |
| 8.08           | rs2954029  | <i>TRIB1</i>        | 8   | 126560154       | 4.0E-02  | 8.8E-02 | 8.3E-04        | 3.9E-02   | 9.9E-02 | 7.7E-04        | 4.1E-02  | 8.6E-02 | 8.4E-04        | 5.1E-02  | 5.8E-02 | 1.3E-03        | -4.4E-02 | 1.0E-01 | 1.0E-03        |
| 8.09           | rs11136341 | <i>PLEC1</i>        | 8   | 145115531       | -1.3E-02 | 6.1E-01 | 7.5E-05        | 1.0E-02   | 6.8E-01 | 4.7E-05        | -5.0E-03 | 8.4E-01 | 1.1E-05        | 2.1E-02  | 4.6E-01 | 2.0E-04        | -1.7E-02 | 5.5E-01 | 1.4E-04        |
| 9.01           | rs3780181  | <i>VLDLR</i>        | 9   | 2630759         | 2.2E-02  | 6.3E-01 | 6.5E-05        | 9.3E-03   | 8.4E-01 | 1.1E-05        | 2.4E-02  | 6.1E-01 | 7.5E-05        | 5.1E-02  | 3.5E-01 | 3.3E-04        | 9.5E-03  | 8.6E-01 | 1.2E-05        |
| 9.02           | rs643531   | <i>TTC39B</i>       | 9   | 15286034        | 4.2E-03  | 9.0E-01 | 4.4E-06        | 1.6E-03   | 9.6E-01 | 6.2E-07        | 4.5E-02  | 2.0E-01 | 4.8E-04        | 8.4E-02  | 3.2E-02 | 1.7E-03        | -7.2E-02 | 6.7E-02 | 1.3E-03        |
| 9.03           | rs1883025  | <i>ABCA1</i>        | 9   | 106704122       | -4.0E-02 | 1.0E-01 | 7.6E-04        | -2.6E-02  | 3.3E-01 | 2.7E-04        | -1.9E-02 | 4.6E-01 | 1.5E-04        | -4.8E-02 | 1.1E-01 | 9.5E-04        | -2.1E-02 | 4.9E-01 | 1.8E-04        |
| 9.04           | rs649129   | <i>ABO</i>          | 9   | 135144125       | 4.8E-02  | 1.0E-01 | 7.7E-04        | 2.8E-02   | 3.3E-01 | 2.7E-04        | 2.2E-02  | 4.6E-01 | 1.6E-04        | -3.6E-03 | 9.2E-01 | 4.0E-06        | -3.1E-02 | 3.6E-01 | 3.1E-04        |
| 10.01          | rs1832007  | <i>AKR1C4</i>       | 10  | 5244847         | -9.5E-02 | 3.5E-03 | 2.4E-03        | -5.3E-02  | 1.1E-01 | 7.4E-04        | -5.2E-02 | 1.2E-01 | 7.1E-04        | 3.4E-02  | 3.7E-01 | 3.0E-04        | -2.3E-02 | 5.5E-01 | 1.3E-04        |
| 10.02          | rs10904908 | <i>TRDMT1</i>       | 10  | 17300296        | -1.2E-02 | 6.2E-01 | 7.0E-05        | -3.1E-02  | 1.9E-01 | 4.8E-04        | -2.9E-02 | 2.2E-01 | 4.2E-04        | -2.0E-02 | 4.6E-01 | 2.0E-04        | -3.7E-02 | 1.8E-01 | 6.9E-04        |
| 10.03          | rs970548   | <i>MARCH8-ALOX5</i> | 10  | 45333283        | 1.5E-02  | 5.6E-01 | 9.7E-05        | 1.7E-02   | 5.3E-01 | 1.1E-04        | -6.3E-04 | 9.8E-01 | 1.6E-07        | -5.7E-03 | 8.5E-01 | 1.3E-05        | 1.7E-02  | 5.8E-01 | 1.2E-04        |
| 10.04          | rs10761731 | <i>JMJD1C</i>       | 10  | 64697616        | -2.9E-02 | 2.2E-01 | 4.3E-04        | -5.2E-03  | 8.3E-01 | 1.4E-05        | -9.2E-03 | 7.0E-01 | 4.2E-05        | 1.8E-02  | 5.0E-01 | 1.7E-04        | -1.4E-02 | 6.2E-01 | 9.6E-05        |
| 10.05          | rs2068888  | <i>CYP26A1</i>      | 10  | 94829632        | -1.7E-02 | 4.6E-01 | 1.5E-04        | -1.3E-02  | 5.7E-01 | 9.0E-05        | 1.5E-02  | 5.3E-01 | 1.1E-04        | 5.2E-03  | 8.5E-01 | 1.4E-05        | 1.4E-03  | 9.6E-01 | 1.0E-06        |

| Cluster number | rsID       | Locus Name      | Chr | Position (hg18) | LDL-C    |         |                | non-HDL-C |         |                | apo B    |         |                | LDL-P    |         |                | LDL-size |         |                |
|----------------|------------|-----------------|-----|-----------------|----------|---------|----------------|-----------|---------|----------------|----------|---------|----------------|----------|---------|----------------|----------|---------|----------------|
|                |            |                 |     |                 | Beta (q) | P-value | R <sup>2</sup> | Beta (q)  | P-value | R <sup>2</sup> | Beta (q) | P-value | R <sup>2</sup> | Beta (q) | P-value | R <sup>2</sup> | Beta (q) | P-value | R <sup>2</sup> |
| 10.06          | rs2255141  | GPAM            | 10  | 113923876       | 2.8E-02  | 2.8E-01 | 3.3E-04        | 3.0E-02   | 2.4E-01 | 3.9E-04        | 3.2E-02  | 2.2E-01 | 4.3E-04        | 8.6E-03  | 7.8E-01 | 3.0E-05        | 8.2E-03  | 7.9E-01 | 2.8E-05        |
| 11.01          | rs2923084  | AMPD3           | 11  | 10345358        | 9.4E-03  | 7.6E-01 | 2.8E-05        | 2.2E-02   | 4.6E-01 | 1.6E-04        | 2.0E-02  | 5.2E-01 | 1.2E-04        | 7.3E-02  | 3.8E-02 | 1.6E-03        | 1.8E-02  | 6.0E-01 | 1.0E-04        |
| 11.02          | rs10832963 | SPTY2D1         | 11  | 18620817        | 1.4E-02  | 5.9E-01 | 8.3E-05        | 1.3E-02   | 6.3E-01 | 6.6E-05        | 4.0E-02  | 1.3E-01 | 6.6E-04        | 5.1E-02  | 9.9E-02 | 1.0E-03        | 2.8E-04  | 9.9E-01 | 3.2E-08        |
| 11.03          | rs3136441  | LRP4            | 11  | 46699823        | -1.3E-02 | 6.9E-01 | 4.6E-05        | 9.4E-03   | 7.8E-01 | 2.2E-05        | 2.7E-02  | 4.3E-01 | 1.8E-04        | 2.7E-02  | 4.9E-01 | 1.8E-04        | -9.6E-03 | 8.0E-01 | 2.3E-05        |
| 11.04          | rs11246602 | OR4C46          | 11  | 51368666        | 4.6E-02  | 1.9E-01 | 5.0E-04        | 2.4E-02   | 5.0E-01 | 1.3E-04        | 7.7E-02  | 3.3E-02 | 1.3E-03        | 6.9E-02  | 1.0E-01 | 1.0E-03        | -5.6E-02 | 1.9E-01 | 6.7E-04        |
| 11.05          | rs174546   | FADS123         | 11  | 61326406        | 4.5E-02  | 6.7E-02 | 9.6E-04        | 5.3E-02   | 3.0E-02 | 1.3E-03        | 5.0E-02  | 4.2E-02 | 1.2E-03        | 5.0E-02  | 7.9E-02 | 1.1E-03        | -4.3E-03 | 8.8E-01 | 8.6E-06        |
| 11.06          | rs12801636 | KAT5            | 11  | 65147893        | -7.3E-03 | 7.9E-01 | 1.9E-05        | -1.2E-02  | 6.7E-01 | 5.1E-05        | 7.0E-03  | 8.1E-01 | 1.7E-05        | 5.9E-03  | 8.6E-01 | 1.2E-05        | -4.3E-02 | 1.9E-01 | 6.4E-04        |
| 11.07          | rs499974   | MOGAT2-DGAT2    | 11  | 75132669        | -1.0E-03 | 9.7E-01 | 3.1E-07        | -1.5E-02  | 6.4E-01 | 6.4E-05        | -4.0E-02 | 2.2E-01 | 4.4E-04        | -2.2E-02 | 5.5E-01 | 1.3E-04        | -7.0E-03 | 8.5E-01 | 1.4E-05        |
| 11.08          | rs964184   | APOA1C3A4A5     | 11  | 116154127       | 3.2E-02  | 3.7E-01 | 2.3E-04        | -1.1E-02  | 7.5E-01 | 2.9E-05        | -1.8E-03 | 9.6E-01 | 7.1E-07        | -4.0E-02 | 3.3E-01 | 3.5E-04        | 1.7E-01  | 4.1E-05 | 6.4E-03        |
| 11.09          | rs11603023 | PHLDB1          | 11  | 117991277       | 5.7E-03  | 8.1E-01 | 1.7E-05        | 3.4E-03   | 8.8E-01 | 6.3E-06        | -1.6E-02 | 4.8E-01 | 1.4E-04        | 8.9E-03  | 7.4E-01 | 4.0E-05        | -4.6E-03 | 8.6E-01 | 1.1E-05        |
| 11.10          | rs7941030  | UBASH3B         | 11  | 122027585       | 1.3E-02  | 5.9E-01 | 8.5E-05        | 1.7E-02   | 4.8E-01 | 1.4E-04        | 4.3E-03  | 8.6E-01 | 9.1E-06        | 2.9E-02  | 2.9E-01 | 4.1E-04        | 1.7E-02  | 5.3E-01 | 1.5E-04        |
| 11.11          | rs11220462 | ST3GAL4         | 11  | 125749162       | 5.9E-02  | 1.0E-01 | 7.7E-04        | 4.0E-02   | 2.7E-01 | 3.5E-04        | 3.7E-02  | 3.2E-01 | 2.9E-04        | 5.0E-02  | 2.4E-01 | 5.2E-04        | 3.0E-03  | 9.4E-01 | 2.0E-06        |
| 12.01          | rs4883201  | PHC1-A2ML1      | 12  | 8973848         | 9.4E-02  | 1.4E-02 | 1.7E-03        | 8.8E-02   | 2.3E-02 | 1.5E-03        | 4.0E-02  | 3.1E-01 | 3.0E-04        | -1.2E-02 | 8.0E-01 | 2.5E-05        | -2.1E-02 | 6.5E-01 | 7.7E-05        |
| 12.02          | rs7134375  | PDE3A           | 12  | 20365025        | -6.1E-02 | 1.1E-02 | 1.9E-03        | -5.0E-02  | 3.6E-02 | 1.2E-03        | -3.0E-02 | 2.2E-01 | 4.4E-04        | -2.7E-02 | 3.3E-01 | 3.6E-04        | 1.7E-02  | 5.3E-01 | 1.5E-04        |
| 12.03          | rs12317268 | SLCO1B1 - delta | 12  | 21243808        | 1.1E-01  | 5.6E-04 | 3.4E-03        | 1.1E-01   | 4.2E-04 | 3.5E-03        | 9.8E-02  | 2.3E-03 | 2.7E-03        | 4.2E-02  | 2.5E-01 | 4.9E-04        | 8.4E-02  | 2.2E-02 | 2.0E-03        |
| 12.04          | rs11613352 | LRP1            | 12  | 56078847        | 2.7E-02  | 3.2E-01 | 2.8E-04        | 2.4E-02   | 3.9E-01 | 2.1E-04        | 3.8E-02  | 1.8E-01 | 5.1E-04        | 4.4E-02  | 1.7E-01 | 6.9E-04        | -9.6E-03 | 7.7E-01 | 3.4E-05        |
| 12.05          | rs7134594  | MVK             | 12  | 108484576       | -1.1E-02 | 6.5E-01 | 5.9E-05        | -2.0E-02  | 3.9E-01 | 2.1E-04        | -9.7E-03 | 6.8E-01 | 4.8E-05        | -7.9E-03 | 7.7E-01 | 3.1E-05        | 4.0E-02  | 1.4E-01 | 8.2E-04        |
| 12.06          | rs11065987 | BRAP            | 12  | 110556807       | 7.2E-04  | 9.8E-01 | 2.7E-07        | -6.4E-03  | 7.9E-01 | 2.1E-05        | -8.5E-04 | 9.7E-01 | 3.6E-07        | 1.2E-03  | 9.6E-01 | 7.4E-07        | -4.8E-03 | 8.6E-01 | 1.1E-05        |
| 12.07          | rs1169288  | HNFI1A          | 12  | 119901033       | 4.8E-03  | 8.6E-01 | 9.4E-06        | 8.1E-03   | 7.6E-01 | 2.7E-05        | -1.3E-02 | 6.3E-01 | 6.7E-05        | 9.5E-05  | 0.99    | 3.6E-09        | 1.5E-02  | 6.2E-01 | 9.3E-05        |
| 12.08          | rs4759375  | SBNO1           | 12  | 122362191       | 6.6E-02  | 9.8E-02 | 7.8E-04        | 4.9E-02   | 2.2E-01 | 4.2E-04        | 5.0E-02  | 2.2E-01 | 4.3E-04        | 5.3E-02  | 2.5E-01 | 4.8E-04        | 1.2E-02  | 8.0E-01 | 2.5E-05        |
| 12.09          | rs4765127  | ZNF664          | 12  | 123026120       | 2.4E-02  | 3.1E-01 | 2.9E-04        | 2.7E-02   | 2.6E-01 | 3.6E-04        | 3.1E-02  | 2.1E-01 | 4.6E-04        | 4.9E-02  | 8.6E-02 | 1.1E-03        | 2.0E-02  | 4.9E-01 | 1.8E-04        |
| 12.10          | rs838880   | SCARB1          | 12  | 123827546       | -4.8E-02 | 5.7E-02 | 1.0E-03        | -5.0E-02  | 4.8E-02 | 1.1E-03        | -5.1E-02 | 4.4E-02 | 1.2E-03        | -3.9E-02 | 1.9E-01 | 6.5E-04        | -2.5E-02 | 3.9E-01 | 2.8E-04        |
| 13.01          | rs4942486  | BRCA2           | 13  | 31851388        | -7.8E-05 | 0.99    | 3.2E-09        | -1.9E-03  | 9.3E-01 | 1.9E-06        | 2.6E-03  | 9.1E-01 | 3.6E-06        | -3.9E-02 | 1.4E-01 | 7.9E-04        | 6.4E-03  | 8.1E-01 | 2.1E-05        |
| 14.01          | rs2332328  | NYNRN1          | 14  | 23952898        | -5.2E-02 | 2.5E-02 | 1.4E-03        | -2.9E-02  | 2.1E-01 | 4.5E-04        | -3.0E-02 | 2.1E-01 | 4.6E-04        | -4.0E-03 | 8.8E-01 | 8.3E-06        | -3.9E-02 | 1.5E-01 | 7.8E-04        |
| 14.02          | rs4983559  | ZBTB42-AKT1     | 14  | 104348254       | -2.8E-02 | 2.4E-01 | 3.9E-04        | -2.5E-03  | 9.2E-01 | 2.9E-06        | -1.4E-02 | 5.7E-01 | 9.4E-05        | 3.3E-02  | 2.4E-01 | 5.1E-04        | -2.8E-02 | 3.3E-01 | 3.7E-04        |
| 15.01          | rs8035382  | FRMD5           | 15  | 42031815        | -4.2E-02 | 4.5E-01 | 1.6E-04        | -2.0E-02  | 7.2E-01 | 3.6E-05        | -1.4E-02 | 8.0E-01 | 1.9E-05        | -3.9E-02 | 5.4E-01 | 1.4E-04        | 4.1E-02  | 5.3E-01 | 1.5E-04        |
| 15.02          | rs1532085  | LIPC            | 15  | 56470658        | -7.5E-03 | 7.6E-01 | 2.7E-05        | -9.5E-03  | 6.9E-01 | 4.4E-05        | -1.6E-02 | 5.1E-01 | 1.2E-04        | 2.6E-02  | 3.5E-01 | 3.2E-04        | -4.5E-02 | 1.1E-01 | 9.6E-04        |
| 15.03          | rs2652834  | LACTB           | 15  | 61183920        | 1.7E-02  | 5.6E-01 | 9.8E-05        | 3.3E-03   | 9.1E-01 | 3.7E-06        | -3.0E-02 | 3.0E-01 | 3.0E-04        | 2.4E-02  | 4.7E-01 | 1.9E-04        | -3.8E-03 | 9.1E-01 | 5.0E-06        |
| 16.01          | rs3198697  | PDXDC1          | 16  | 15037441        | 3.4E-02  | 1.4E-01 | 6.2E-04        | 2.9E-02   | 2.2E-01 | 4.3E-04        | 2.6E-02  | 2.8E-01 | 3.3E-04        | 3.9E-02  | 1.5E-01 | 7.6E-04        | -2.8E-02 | 3.2E-01 | 3.8E-04        |
| 16.02          | rs11649653 | CTF1            | 16  | 30825988        | -2.8E-02 | 2.4E-01 | 3.9E-04        | -3.2E-02  | 1.8E-01 | 5.2E-04        | -6.3E-02 | 9.7E-03 | 1.9E-03        | -4.4E-02 | 1.1E-01 | 9.5E-04        | -3.7E-02 | 1.8E-01 | 6.8E-04        |
| 16.03          | rs1121980  | FTO             | 16  | 52366748        | -2.1E-02 | 3.7E-01 | 2.3E-04        | -2.9E-02  | 2.1E-01 | 4.4E-04        | -2.6E-02 | 2.8E-01 | 3.4E-04        | -2.6E-02 | 3.4E-01 | 3.4E-04        | 2.6E-02  | 3.4E-01 | 3.5E-04        |
| 16.04          | rs3764261  | CETP            | 16  | 55550825        | -1.3E-02 | 5.9E-01 | 8.5E-05        | 1.0E-02   | 6.8E-01 | 4.8E-05        | 2.0E-02  | 4.3E-01 | 1.8E-04        | 1.1E-02  | 7.1E-01 | 5.0E-05        | -1.1E-01 | 9.7E-05 | 5.8E-03        |
| 16.05          | rs16942887 | LCAT            | 16  | 66485543        | 1.4E-02  | 6.9E-01 | 4.5E-05        | 1.1E-02   | 7.6E-01 | 2.6E-05        | 6.8E-02  | 6.2E-02 | 1.0E-03        | 6.7E-02  | 1.1E-01 | 9.6E-04        | 2.4E-03  | 9.5E-01 | 1.3E-06        |
| 16.06          | rs2000999  | HPR             | 16  | 70665594        | 3.9E-03  | 9.0E-01 | 4.6E-06        | 1.5E-02   | 6.2E-01 | 6.9E-05        | -1.5E-02 | 6.2E-01 | 6.9E-05        | 2.7E-02  | 4.4E-01 | 2.2E-04        | -4.3E-02 | 2.3E-01 | 5.4E-04        |
| 16.07          | rs2925979  | CMIP            | 16  | 80092291        | -3.2E-02 | 2.1E-01 | 4.6E-04        | -4.2E-02  | 1.0E-01 | 7.6E-04        | -4.8E-02 | 6.6E-02 | 9.7E-04        | -1.4E-02 | 6.3E-01 | 8.8E-05        | 3.6E-02  | 2.3E-01 | 5.5E-04        |
| 17.01          | rs314253   | DLG4            | 17  | 7032374         | -6.7E-03 | 7.8E-01 | 2.2E-05        | -5.6E-03  | 8.2E-01 | 1.5E-05        | -2.2E-02 | 3.8E-01 | 2.2E-04        | -8.4E-04 | 9.8E-01 | 3.3E-07        | 2.3E-02  | 4.1E-01 | 2.6E-04        |
| 17.02          | rs881844   | STAR3           | 17  | 35063744        | -1.0E-02 | 6.8E-01 | 4.7E-05        | -1.3E-02  | 5.9E-01 | 8.2E-05        | 3.4E-03  | 8.9E-01 | 5.4E-06        | 1.1E-02  | 7.1E-01 | 5.1E-05        | 1.6E-02  | 5.8E-01 | 1.2E-04        |
| 17.03          | rs8077889  | MPP3            | 17  | 39233692        | 2.5E-02  | 3.8E-01 | 2.2E-04        | 3.7E-02   | 1.9E-01 | 4.8E-04        | 2.3E-02  | 4.2E-01 | 1.9E-04        | 3.1E-03  | 9.2E-01 | 3.4E-06        | -4.2E-02 | 2.0E-01 | 6.1E-04        |
| 17.04          | rs7225700  | OSBPL7          | 17  | 42746803        | -6.7E-03 | 7.8E-01 | 2.2E-05        | 3.3E-04   | 9.9E-01 | 5.3E-08        | -5.0E-03 | 8.4E-01 | 1.2E-05        | 2.6E-03  | 9.2E-01 | 3.3E-06        | -1.6E-02 | 5.7E-01 | 1.2E-04        |
| 17.05          | rs1801689  | APOH-PRXCA      | 17  | 61641042        | 1.3E-01  | 5.7E-02 | 1.0E-03        | 1.1E-01   | 1.1E-01 | 7.4E-04        | 5.1E-02  | 4.6E-01 | 1.6E-04        | 8.7E-02  | 2.8E-01 | 4.3E-04        | -7.7E-02 | 3.4E-01 | 3.5E-04        |
| 17.06          | rs4148008  | ABCA8           | 17  | 64386889        | 3.0E-02  | 2.3E-01 | 4.2E-04        | -7.0E-04  | 9.8E-01 | 2.2E-07        | 1.9E-03  | 9.4E-01 | 1.5E-06        | -9.2E-03 | 7.6E-01 | 3.6E-05        | 2.9E-02  | 3.3E-01 | 3.6E-04        |
| 17.07          | rs4082919  | PGS1            | 17  | 73889077        | 1.4E-03  | 9.5E-01 | 1.0E-06        | 6.9E-03   | 7.7E-01 | 2.5E-05        | -6.7E-03 | 7.8E-01 | 2.3E-05        | -3.6E-03 | 8.9E-01 | 6.5E-06        | -5.0E-02 | 6.9E-02 | 1.3E-03        |
| 18.01          | rs7241918  | LIPG            | 18  | 45414951        | 6.6E-02  | 3.1E-02 | 1.3E-03        | 6.0E-02   | 5.2E-02 | 1.1E-03        | 7.7E-03  | 8.1E-01 | 1.7E-05        | 2.8E-02  | 4.3E-01 | 2.4E-04        | -1.3E-03 | 9.7E-01 | 5.4E-07        |
| 18.02          | rs12967135 | MC4R            | 18  | 56000003        | -1.9E-02 | 5.0E-01 | 1.3E-04        | -7.7E-03  | 7.8E-01 | 2.2E-05        | -9.9E-03 | 7.3E-01 | 3.5E-05        | 6.0E-03  | 8.5E-01 | 1.3E-05        | -7.1E-02 | 2.8E-02 | 1.8E-03        |
| 19.01          | rs7248104  | INSR            | 19  | 7175431         | -8.2E-03 | 7.3E-01 | 3.4E-05        | -5.1E-03  | 8.3E-01 | 1.3E-05        | -3.1E-02 | 2.0E-01 | 4.6E-04        | 1.9E-03  | 9.4E-01 | 1.8E-06        | 3.7E-03  | 8.9E-01 | 6.8E-06        |
| 19.02          | rs7255436  | ANGPTLA         | 19  | 8339196         | 2.4E-02  | 3.0E-01 | 3.1E-04        | 2.0E-02   | 3.8E-01 | 2.1E-04        | 1.3E-02  | 5.7E-01 | 9.3E-05        | -5.4E-02 | 4.5E-02 | 1.5E-03        | 2.4E-02  | 3.7E-01 | 3.1E-04        |
| 19.03          | rs11672123 | LDLR - delta    | 19  | 11055823        | 1.3E-01  | 1.8E-02 | 1.6E-03        | 1.1E-01   | 3.6E-02 | 1.2E-03        | 1.2E-01  | 3.4E-02 | 1.3E-03        | 1.1E-01  | 8.9E-02 | 1.1E-03        | -9.7E-02 | 1.2E-01 | 9.1E-04        |
| 19.04          | rs6511720  | LDLR            | 19  | 11063306        | -2.6E-02 | 4.1E-01 | 2.0E-04        | -1.5E-02  | 6.3E-01 | 6.7E-05        | -6.1E-03 | 8.5E-01 | 1.0E-05        | -2.7E-02 | 4.6E-01 | 2.0E-04        | -2.8E-02 | 4.5E-01 | 2.1E-04        |

| Cluster number | rsID       | Locus Name          | Chr | Position (hg18) | LDL-C    |         |                | non-HDL-C |         |                | apo B    |         |                | LDL-P    |         |                | LDL-size |         |                |
|----------------|------------|---------------------|-----|-----------------|----------|---------|----------------|-----------|---------|----------------|----------|---------|----------------|----------|---------|----------------|----------|---------|----------------|
|                |            |                     |     |                 | Beta (q) | P-value | R <sup>2</sup> | Beta (q)  | P-value | R <sup>2</sup> | Beta (q) | P-value | R <sup>2</sup> | Beta (q) | P-value | R <sup>2</sup> | Beta (q) | P-value | R <sup>2</sup> |
| 19.05          | rs737337   | <i>LOC55908</i>     | 19  | 11208493        | -3.7E-02 | 3.9E-01 | 2.1E-04        | -6.4E-02  | 1.4E-01 | 6.2E-04        | -8.4E-02 | 5.5E-02 | 1.1E-03        | -1.1E-01 | 2.2E-02 | 1.9E-03        | -5.4E-03 | 9.2E-01 | 4.3E-06        |
| 19.06          | rs10401969 | <i>CILP2</i>        | 19  | 19268718        | 5.6E-02  | 1.7E-01 | 5.3E-04        | 1.2E-01   | 3.5E-03 | 2.4E-03        | 1.7E-01  | 7.2E-05 | 4.5E-03        | 1.3E-01  | 8.0E-03 | 2.6E-03        | -3.6E-02 | 4.5E-01 | 2.2E-04        |
| 19.07          | rs731839   | <i>PEPD</i>         | 19  | 38590905        | 2.8E-02  | 2.5E-01 | 3.8E-04        | 3.0E-02   | 2.2E-01 | 4.3E-04        | -2.6E-03 | 9.2E-01 | 3.2E-06        | 2.2E-02  | 4.3E-01 | 2.3E-04        | -6.9E-03 | 8.1E-01 | 2.2E-05        |
| 19.08          | rs7412     | <i>APOE - delta</i> | 19  | 50103919        | -4.5E-02 | 1.9E-01 | 4.9E-04        | -5.8E-02  | 9.3E-02 | 8.0E-04        | 1.0E-01  | 4.0E-03 | 2.4E-03        | 1.4E-01  | 4.4E-04 | 4.6E-03        | 6.7E-02  | 1.0E-01 | 1.0E-03        |
| 19.09          | rs4420638  | <i>APOEC1C2</i>     | 19  | 50114786        | 5.4E-02  | 1.3E-01 | 6.5E-04        | 3.9E-02   | 2.8E-01 | 3.4E-04        | -5.8E-02 | 1.1E-01 | 7.2E-04        | -9.1E-02 | 3.2E-02 | 1.7E-03        | 4.8E-02  | 2.6E-01 | 4.9E-04        |
| 19.10          | rs492602   | <i>FLJ36070</i>     | 19  | 53898229        | -2.6E-03 | 9.1E-01 | 3.7E-06        | 1.2E-02   | 6.0E-01 | 7.9E-05        | 2.7E-02  | 2.5E-01 | 3.9E-04        | 3.6E-02  | 1.8E-01 | 6.7E-04        | 3.1E-02  | 2.6E-01 | 4.9E-04        |
| 19.11          | rs17695224 | <i>HAS1</i>         | 19  | 57016028        | 1.2E-02  | 6.3E-01 | 6.6E-05        | 2.5E-02   | 3.4E-01 | 2.6E-04        | -7.7E-03 | 7.7E-01 | 2.5E-05        | -6.3E-03 | 8.3E-01 | 1.7E-05        | -2.5E-02 | 4.0E-01 | 2.8E-04        |
| 19.12          | rs386000   | <i>LILRA3</i>       | 19  | 59484573        | 1.1E-02  | 7.0E-01 | 4.2E-05        | 2.7E-02   | 3.3E-01 | 2.7E-04        | 5.2E-02  | 6.6E-02 | 9.7E-04        | 6.1E-02  | 6.4E-02 | 1.3E-03        | -1.8E-02 | 5.8E-01 | 1.2E-04        |
| 20.01          | rs364585   | <i>SPTLC3</i>       | 20  | 12910718        | -2.8E-02 | 2.3E-01 | 4.1E-04        | -2.7E-02  | 2.7E-01 | 3.5E-04        | -4.6E-02 | 5.7E-02 | 1.0E-03        | -4.2E-02 | 1.3E-01 | 8.5E-04        | 1.1E-02  | 6.9E-01 | 5.9E-05        |
| 20.02          | rs2328223  | <i>SNX5</i>         | 20  | 17793921        | -9.7E-03 | 7.4E-01 | 3.0E-05        | 1.1E-02   | 7.3E-01 | 3.5E-05        | 7.5E-04  | 9.8E-01 | 1.7E-07        | 4.7E-02  | 1.8E-01 | 6.5E-04        | 4.7E-02  | 1.8E-01 | 6.8E-04        |
| 20.03          | rs2277862  | <i>ERGIC3</i>       | 20  | 33616196        | -4.3E-03 | 9.0E-01 | 5.0E-06        | -4.5E-03  | 8.9E-01 | 5.5E-06        | -3.3E-02 | 3.2E-01 | 2.8E-04        | -8.7E-02 | 2.1E-02 | 2.0E-03        | 7.0E-02  | 6.6E-02 | 1.3E-03        |
| 20.04          | rs2902940  | <i>MAFB</i>         | 20  | 38524901        | 8.5E-03  | 7.4E-01 | 3.1E-05        | -2.0E-03  | 9.4E-01 | 1.7E-06        | -2.0E-04 | 9.9E-01 | 1.7E-08        | 1.8E-02  | 5.5E-01 | 1.3E-04        | -3.9E-02 | 2.0E-01 | 6.4E-04        |
| 20.05          | rs909802   | <i>TOP1</i>         | 20  | 39370229        | 3.5E-03  | 8.8E-01 | 6.3E-06        | 1.7E-02   | 4.8E-01 | 1.4E-04        | -7.0E-03 | 7.7E-01 | 2.5E-05        | -2.8E-02 | 3.0E-01 | 3.9E-04        | -4.4E-03 | 8.7E-01 | 1.0E-05        |
| 20.06          | rs1800961  | <i>HNF4A</i>        | 20  | 42475778        | 4.5E-02  | 5.3E-01 | 1.1E-04        | 6.2E-03   | 9.3E-01 | 2.2E-06        | -2.0E-02 | 7.8E-01 | 2.2E-05        | -3.5E-02 | 6.8E-01 | 6.3E-05        | 8.5E-03  | 9.2E-01 | 3.9E-06        |
| 20.07          | rs6065906  | <i>PLTP</i>         | 20  | 43987422        | -5.3E-02 | 8.1E-02 | 8.7E-04        | -6.3E-02  | 3.9E-02 | 1.2E-03        | -7.5E-02 | 1.6E-02 | 1.7E-03        | -7.7E-02 | 3.0E-02 | 1.7E-03        | -1.8E-02 | 6.0E-01 | 1.0E-04        |
| 22.01          | rs181362   | <i>UBE2L3</i>       | 22  | 20262068        | 2.8E-02  | 3.5E-01 | 2.5E-04        | 3.2E-02   | 2.8E-01 | 3.3E-04        | 3.1E-02  | 3.0E-01 | 3.0E-04        | 2.3E-02  | 4.9E-01 | 1.7E-04        | 7.8E-04  | 9.8E-01 | 1.9E-07        |
| 22.02          | rs5763662  | <i>MTMR3</i>        | 22  | 28708703        | -1.1E-01 | 1.4E-01 | 6.2E-04        | -1.1E-01  | 1.4E-01 | 6.3E-04        | -1.7E-01 | 1.9E-02 | 1.6E-03        | -6.8E-02 | 4.4E-01 | 2.3E-04        | 7.1E-02  | 4.1E-01 | 2.6E-04        |
| 22.03          | rs138777   | <i>TOM1</i>         | 22  | 34041098        | -5.0E-03 | 8.4E-01 | 1.2E-05        | 2.2E-02   | 3.7E-01 | 2.3E-04        | 7.3E-03  | 7.7E-01 | 2.5E-05        | 3.9E-02  | 1.7E-01 | 6.9E-04        | 4.3E-03  | 8.8E-01 | 8.6E-06        |
| 22.04          | rs5756931  | <i>PLA2G6</i>       | 22  | 36875979        | -1.6E-02 | 5.1E-01 | 1.3E-04        | -2.1E-02  | 3.8E-01 | 2.2E-04        | -2.9E-02 | 2.4E-01 | 4.0E-04        | -2.0E-03 | 9.4E-01 | 1.9E-06        | -2.9E-02 | 2.9E-01 | 4.2E-04        |
| 22.05          | rs4253772  | <i>PPARA</i>        | 22  | 45006267        | 1.2E-02  | 7.3E-01 | 3.5E-05        | 2.7E-02   | 5.3E-01 | 1.1E-04        | -1.3E-02 | 7.4E-01 | 3.2E-05        | 5.4E-02  | 3.6E-01 | 3.1E-04        | -5.9E-02 | 1.5E-01 | 8.1E-04        |

Cluster number: unique numeric identifier for each of the SNPs in the analysis

rsID: SNP name

Chr: chromosome

Beta (q): Beta-coefficient from inverse-quantile transformed data

R<sup>2</sup>: variance explained by SNP

**Supplemental Table 6b:** Association results for index variants in each candidate region tested and association with percentage change in LDL-C, non-HDL-C, apo B, LDL-P and LDL-size among the rosuvastatin allocated arm only.

| Cluster number | rsID       | Locus Name           | Chr | Position (hg18) | LDL-C    |         |                | non-HDL-C |         |                | apo B    |         |                | LDL-P    |         |                | LDL-size |         |                |
|----------------|------------|----------------------|-----|-----------------|----------|---------|----------------|-----------|---------|----------------|----------|---------|----------------|----------|---------|----------------|----------|---------|----------------|
|                |            |                      |     |                 | Beta (q) | P-value | R <sup>2</sup> | Beta (q)  | P-value | R <sup>2</sup> | Beta (q) | P-value | R <sup>2</sup> | Beta (q) | P-value | R <sup>2</sup> | Beta (q) | P-value | R <sup>2</sup> |
| 1.01           | rs1077514  | <i>ASAP3</i>         | 1   | 23638820        | -3.6E-02 | 2.9E-01 | 3.2E-04        | -4.0E-02  | 2.4E-01 | 4.0E-04        | -6.1E-02 | 7.9E-02 | 8.9E-04        | -1.7E-02 | 6.6E-01 | 7.1E-05        | -1.8E-03 | 9.6E-01 | 8.3E-07        |
| 1.02           | rs12027135 | <i>LDLRAP1</i>       | 1   | 25648320        | 1.7E-02  | 4.7E-01 | 1.5E-04        | 2.8E-02   | 2.3E-01 | 4.1E-04        | -1.7E-03 | 9.4E-01 | 1.4E-06        | -4.2E-02 | 1.2E-01 | 8.8E-04        | -2.9E-02 | 2.8E-01 | 4.4E-04        |
| 1.03           | rs12748152 | <i>PIGV-NROB2</i>    | 1   | 27010980        | 2.8E-02  | 5.4E-01 | 1.1E-04        | 6.4E-02   | 1.5E-01 | 5.8E-04        | 3.5E-02  | 4.5E-01 | 1.6E-04        | 3.2E-02  | 5.4E-01 | 1.4E-04        | -4.0E-02 | 4.5E-01 | 2.2E-04        |
| 1.04           | rs4660293  | <i>PABPC4</i>        | 1   | 39800767        | -3.1E-02 | 2.5E-01 | 3.8E-04        | -3.6E-02  | 1.9E-01 | 4.9E-04        | -2.2E-02 | 4.2E-01 | 1.9E-04        | -8.0E-04 | 9.8E-01 | 2.4E-07        | -6.0E-02 | 6.0E-02 | 1.3E-03        |
| 1.05           | rs2479409  | <i>PCSK9</i>         | 1   | 55277238        | 1.7E-03  | 9.5E-01 | 1.3E-06        | 1.7E-03   | 9.5E-01 | 1.3E-06        | 3.3E-03  | 9.0E-01 | 4.9E-06        | -1.8E-02 | 5.2E-01 | 1.5E-04        | 1.6E-02  | 5.8E-01 | 1.2E-04        |
| 1.06           | rs17111584 | <i>PCSK9 - delta</i> | 1   | 55319284        | 1.7E-01  | 1.8E-03 | 2.8E-03        | 1.8E-01   | 1.1E-03 | 3.0E-03        | 1.3E-01  | 1.6E-02 | 1.7E-03        | 5.8E-02  | 3.6E-01 | 3.1E-04        | 1.0E-02  | 8.7E-01 | 1.0E-05        |
| 1.07           | rs2131925  | <i>ANGPTL3</i>       | 1   | 62798530        | 2.7E-04  | 9.9E-01 | 3.6E-08        | -1.7E-02  | 4.7E-01 | 1.5E-04        | 7.3E-03  | 7.6E-01 | 2.6E-05        | 1.7E-02  | 5.4E-01 | 1.4E-04        | -4.8E-02 | 8.7E-02 | 1.1E-03        |
| 1.08           | rs7515577  | <i>EVI5</i>          | 1   | 92782026        | -3.8E-02 | 1.8E-01 | 5.1E-04        | -4.5E-02  | 1.1E-01 | 7.2E-04        | -6.4E-02 | 2.5E-02 | 1.4E-03        | -9.0E-02 | 5.6E-03 | 2.8E-03        | 3.8E-03  | 9.1E-01 | 5.0E-06        |
| 1.09           | rs629301   | <i>SORT1</i>         | 1   | 109619829       | -9.0E-02 | 6.2E-04 | 3.3E-03        | -8.8E-02  | 7.9E-04 | 3.2E-03        | -8.3E-02 | 2.0E-03 | 2.7E-03        | -4.4E-02 | 1.5E-01 | 7.5E-04        | 1.7E-02  | 5.9E-01 | 1.1E-04        |
| 1.10           | rs267733   | <i>ANXA9-CERS2</i>   | 1   | 149225460       | 4.2E-02  | 1.8E-01 | 5.3E-04        | 4.4E-02   | 1.5E-01 | 5.8E-04        | 3.1E-02  | 3.2E-01 | 2.8E-04        | 9.6E-03  | 7.9E-01 | 2.7E-05        | -1.4E-02 | 7.0E-01 | 5.8E-05        |
| 1.11           | rs12145743 | <i>HMGF-PMVK</i>     | 1   | 154967275       | -5.8E-03 | 8.1E-01 | 1.6E-05        | -3.3E-04  | 9.9E-01 | 5.3E-08        | -1.4E-02 | 5.7E-01 | 9.3E-05        | 2.5E-02  | 3.7E-01 | 3.0E-04        | -1.9E-02 | 5.1E-01 | 1.7E-04        |
| 1.12           | rs4650994  | <i>ANGPTL1</i>       | 1   | 176781935       | -1.4E-02 | 5.5E-01 | 1.0E-04        | -1.7E-02  | 4.7E-01 | 1.5E-04        | -1.7E-02 | 4.8E-01 | 1.5E-04        | -2.4E-02 | 3.7E-01 | 3.0E-04        | 3.2E-02  | 2.4E-01 | 5.2E-04        |
| 1.13           | rs1689800  | <i>ZNF648</i>        | 1   | 180435508       | 2.0E-02  | 4.1E-01 | 1.9E-04        | 2.0E-02   | 4.0E-01 | 2.0E-04        | 3.2E-02  | 1.9E-01 | 5.0E-04        | 6.6E-03  | 8.1E-01 | 2.1E-05        | -1.9E-02 | 4.9E-01 | 1.8E-04        |
| 1.14           | rs2807834  | <i>MOSC1</i>         | 1   | 219037216       | -2.4E-02 | 3.4E-01 | 2.6E-04        | -2.2E-02  | 3.8E-01 | 2.2E-04        | -4.7E-02 | 6.0E-02 | 1.0E-03        | 4.5E-03  | 8.7E-01 | 9.3E-06        | 2.1E-02  | 4.6E-01 | 2.1E-04        |
| 1.15           | rs4846914  | <i>GALNT2</i>        | 1   | 228362314       | 1.8E-02  | 4.6E-01 | 1.6E-04        | 9.6E-03   | 6.9E-01 | 4.6E-05        | 1.9E-02  | 4.4E-01 | 1.7E-04        | 1.9E-02  | 5.0E-01 | 1.7E-04        | 5.8E-02  | 3.7E-02 | 1.7E-03        |
| 1.16           | rs514230   | <i>IRF2BP2</i>       | 1   | 232925220       | 7.3E-03  | 7.5E-01 | 2.8E-05        | 2.3E-03   | 9.2E-01 | 2.8E-06        | 8.0E-03  | 7.3E-01 | 3.3E-05        | 3.4E-02  | 2.1E-01 | 6.0E-04        | -5.4E-02 | 4.8E-02 | 1.5E-03        |
| 2.01           | rs1367117  | <i>APOB</i>          | 2   | 21117405        | -1.2E-03 | 9.6E-01 | 6.7E-07        | -1.2E-02  | 6.5E-01 | 5.8E-05        | 4.2E-03  | 8.7E-01 | 7.5E-06        | -6.0E-03 | 8.4E-01 | 1.5E-05        | 1.5E-02  | 6.2E-01 | 9.5E-05        |
| 2.02           | rs1260326  | <i>GCKR</i>          | 2   | 27584444        | -2.4E-02 | 3.0E-01 | 3.0E-04        | -8.3E-04  | 9.7E-01 | 3.5E-07        | -4.2E-03 | 8.6E-01 | 9.0E-06        | -4.7E-02 | 8.5E-02 | 1.1E-03        | 3.1E-02  | 2.5E-01 | 5.0E-04        |
| 2.03           | rs4299376  | <i>ABCG5-8</i>       | 2   | 43926080        | 1.9E-02  | 4.4E-01 | 1.7E-04        | 2.0E-02   | 4.2E-01 | 1.9E-04        | -1.0E-02 | 6.8E-01 | 4.8E-05        | 2.0E-02  | 4.9E-01 | 1.8E-04        | 1.1E-02  | 7.1E-01 | 5.2E-05        |
| 2.04           | rs2710642  | <i>EHBP1</i>         | 2   | 63003061        | -4.6E-02 | 6.1E-02 | 1.0E-03        | -4.9E-02  | 4.7E-02 | 1.1E-03        | -4.7E-02 | 6.0E-02 | 1.0E-03        | -1.2E-02 | 6.6E-01 | 7.0E-05        | -1.4E-02 | 6.2E-01 | 9.2E-05        |
| 2.05           | rs10490626 | <i>INSIG2</i>        | 2   | 118552311       | -1.3E-02 | 7.5E-01 | 2.9E-05        | 1.4E-02   | 7.3E-01 | 3.3E-05        | 5.7E-03  | 8.9E-01 | 5.5E-06        | -2.5E-02 | 5.9E-01 | 1.1E-04        | 5.4E-02  | 2.6E-01 | 4.9E-04        |
| 2.06           | rs2030746  | <i>LOC84931</i>      | 2   | 121025958       | 6.1E-03  | 8.0E-01 | 1.9E-05        | -2.0E-02  | 3.9E-01 | 2.1E-04        | 1.4E-03  | 9.5E-01 | 9.4E-07        | 1.3E-02  | 6.4E-01 | 7.9E-05        | -1.9E-03 | 9.4E-01 | 1.8E-06        |
| 2.07           | rs6759321  | <i>RABGAP1</i>       | 2   | 136039146       | -1.1E-02 | 6.7E-01 | 5.2E-05        | -1.0E-02  | 6.9E-01 | 4.7E-05        | -1.1E-02 | 6.6E-01 | 5.6E-05        | -3.9E-02 | 1.9E-01 | 6.3E-04        | 1.9E-02  | 5.2E-01 | 1.5E-04        |
| 2.08           | rs10195252 | <i>COBLL1</i>        | 2   | 165221337       | -3.7E-03 | 8.8E-01 | 6.8E-06        | -8.8E-03  | 7.2E-01 | 3.8E-05        | -4.4E-02 | 7.4E-02 | 9.1E-04        | -3.3E-02 | 2.3E-01 | 5.3E-04        | 1.2E-02  | 6.6E-01 | 7.6E-05        |
| 2.09           | rs2287623  | <i>ABCB11</i>        | 2   | 169538401       | -7.9E-03 | 7.4E-01 | 3.1E-05        | -2.4E-02  | 3.0E-01 | 3.0E-04        | -2.0E-02 | 4.2E-01 | 1.9E-04        | 2.5E-02  | 3.7E-01 | 3.0E-04        | -3.0E-03 | 9.1E-01 | 4.5E-06        |
| 2.10           | rs11694172 | <i>FAM117B</i>       | 2   | 203240549       | 3.4E-02  | 2.0E-01 | 4.6E-04        | 3.4E-02   | 2.1E-01 | 4.5E-04        | 4.7E-02  | 8.6E-02 | 8.5E-04        | 2.2E-02  | 4.9E-01 | 1.8E-04        | -8.0E-02 | 1.2E-02 | 2.4E-03        |
| 2.11           | rs1250229  | <i>FN1</i>           | 2   | 216012629       | -2.4E-02 | 3.6E-01 | 2.4E-04        | -7.9E-03  | 7.7E-01 | 2.5E-05        | -2.1E-02 | 4.5E-01 | 1.7E-04        | 5.4E-03  | 8.6E-01 | 1.1E-05        | -1.8E-02 | 5.6E-01 | 1.3E-04        |
| 2.12           | rs2943645  | <i>IRS1</i>          | 2   | 226807424       | -4.6E-02 | 5.1E-02 | 1.1E-03        | -2.6E-02  | 2.8E-01 | 3.3E-04        | -4.2E-02 | 8.3E-02 | 8.6E-04        | -5.2E-02 | 5.7E-02 | 1.3E-03        | 4.7E-02  | 9.1E-02 | 1.1E-03        |
| 2.13           | rs11563251 | <i>UGT1A1</i>        | 2   | 234344123       | -1.4E-02 | 7.1E-01 | 4.0E-05        | -3.3E-03  | 9.3E-01 | 2.3E-06        | 2.3E-02  | 5.3E-01 | 1.1E-04        | 3.3E-02  | 4.3E-01 | 2.3E-04        | 3.5E-02  | 4.0E-01 | 2.7E-04        |
| 3.01           | rs2606736  | <i>ATG7</i>          | 3   | 11375249        | -2.3E-02 | 3.4E-01 | 2.6E-04        | -1.4E-02  | 5.7E-01 | 9.3E-05        | -2.0E-02 | 4.3E-01 | 1.8E-04        | -2.8E-02 | 3.2E-01 | 3.6E-04        | -3.4E-02 | 2.4E-01 | 5.2E-04        |
| 3.02           | rs2290159  | <i>RAF1</i>          | 3   | 12603920        | -3.8E-02 | 1.7E-01 | 5.4E-04        | -1.5E-02  | 5.9E-01 | 8.1E-05        | 8.9E-03  | 7.5E-01 | 2.8E-05        | -3.5E-02 | 2.8E-01 | 4.3E-04        | -7.3E-03 | 8.2E-01 | 1.9E-05        |
| 3.03           | rs7640978  | <i>CFMTM6</i>        | 3   | 32508014        | -2.3E-02 | 5.4E-01 | 1.1E-04        | -7.3E-02  | 5.3E-02 | 1.1E-03        | -6.4E-02 | 9.3E-02 | 8.1E-04        | -7.9E-03 | 8.6E-01 | 1.2E-05        | 1.7E-02  | 7.1E-01 | 5.3E-05        |
| 3.04           | rs2290547  | <i>SETD2</i>         | 3   | 47036187        | 8.1E-03  | 7.9E-01 | 2.0E-05        | 1.6E-02   | 6.0E-01 | 8.0E-05        | -9.5E-03 | 7.6E-01 | 2.7E-05        | -2.5E-02 | 4.7E-01 | 1.9E-04        | -1.2E-02 | 7.4E-01 | 4.3E-05        |
| 3.05           | rs2013208  | <i>RBM5</i>          | 3   | 50104403        | 1.2E-02  | 6.1E-01 | 7.5E-05        | 7.5E-03   | 7.5E-01 | 2.9E-05        | 3.4E-02  | 1.4E-01 | 6.1E-04        | 5.6E-03  | 8.3E-01 | 1.6E-05        | -1.4E-02 | 6.1E-01 | 9.8E-05        |
| 3.06           | rs13326165 | <i>STAB1</i>         | 3   | 52507158        | 7.2E-03  | 8.0E-01 | 1.9E-05        | 3.7E-02   | 1.9E-01 | 4.8E-04        | 6.0E-02  | 3.8E-02 | 1.2E-03        | 4.2E-02  | 2.0E-01 | 6.0E-04        | -5.1E-02 | 1.3E-01 | 8.9E-04        |
| 3.07           | rs13315871 | <i>PXK</i>           | 3   | 58356327        | -8.6E-02 | 3.5E-02 | 1.3E-03        | -9.9E-02  | 1.5E-02 | 1.7E-03        | -8.0E-02 | 5.5E-02 | 1.1E-03        | -3.8E-02 | 4.2E-01 | 2.4E-04        | 2.1E-02  | 6.6E-01 | 7.5E-05        |
| 3.08           | rs6805251  | <i>GSK3B</i>         | 3   | 121043296       | -3.2E-02 | 1.8E-01 | 5.1E-04        | -6.5E-02  | 6.3E-03 | 2.1E-03        | -6.9E-02 | 4.2E-03 | 2.3E-03        | -4.7E-02 | 8.6E-02 | 1.1E-03        | 4.6E-02  | 9.7E-02 | 1.0E-03        |
| 3.09           | rs17404153 | <i>ACAD11</i>        | 3   | 133645890       | 7.8E-02  | 2.5E-02 | 1.4E-03        | 5.7E-02   | 9.6E-02 | 7.9E-04        | 4.8E-02  | 1.7E-01 | 5.4E-04        | 6.0E-02  | 1.4E-01 | 8.2E-04        | 6.7E-02  | 1.0E-01 | 1.0E-03        |
| 3.10           | rs645040   | <i>MSL2L1</i>        | 3   | 137409312       | 6.8E-02  | 1.3E-02 | 1.8E-03        | 4.5E-02   | 1.0E-01 | 7.6E-04        | 3.0E-02  | 2.8E-01 | 3.3E-04        | -2.5E-02 | 4.2E-01 | 2.4E-04        | 4.8E-02  | 1.4E-01 | 8.5E-04        |
| 4.01           | rs6831256  | <i>LRPAP1</i>        | 4   | 3442937         | 3.1E-03  | 9.0E-01 | 4.9E-06        | -2.6E-03  | 9.1E-01 | 3.4E-06        | 8.1E-03  | 7.3E-01 | 3.3E-05        | 2.0E-02  | 4.6E-01 | 2.0E-04        | 3.5E-02  | 2.1E-01 | 6.0E-04        |
| 4.02           | rs10019888 | <i>C4orf52</i>       | 4   | 25672088        | -1.3E-03 | 9.7E-01 | 4.6E-07        | 4.3E-03   | 8.9E-01 | 5.3E-06        | 1.1E-02  | 7.2E-01 | 3.6E-05        | 1.4E-02  | 7.1E-01 | 5.3E-05        | 2.7E-02  | 4.7E-01 | 2.0E-04        |
| 4.03           | rs442177   | <i>KLHL8</i>         | 4   | 88249285        | -1.6E-02 | 4.9E-01 | 1.3E-04        | -1.6E-02  | 5.0E-01 | 1.3E-04        | -1.9E-02 | 4.2E-01 | 1.9E-04        | 1.4E-02  | 6.3E-01 | 8.8E-05        | -3.2E-03 | 9.1E-01 | 4.9E-06        |
| 4.04           | rs2199936  | <i>ABCG2 - delta</i> | 4   | 89264355        | -3.0E-01 | 6.5E-16 | 1.8E-02        | -3.3E-01  | 2.2E-19 | 2.3E-02        | -2.9E-01 | 2.7E-14 | 1.6E-02        | -1.9E-01 | 1.0E-05 | 7.2E-03        | -8.6E-02 | 4.7E-02 | 1.5E-03        |

| Cluster number | rsID       | Locus Name   | Chr | Position (hg18) | LDL-C    |         |                | non-HDL-C |         |                | apo B    |         |                | LDL-P    |         |                | LDL-size |         |                |
|----------------|------------|--------------|-----|-----------------|----------|---------|----------------|-----------|---------|----------------|----------|---------|----------------|----------|---------|----------------|----------|---------|----------------|
|                |            |              |     |                 | Beta (q) | P-value | R <sup>2</sup> | Beta (q)  | P-value | R <sup>2</sup> | Beta (q) | P-value | R <sup>2</sup> | Beta (q) | P-value | R <sup>2</sup> | Beta (q) | P-value | R <sup>2</sup> |
| 4.05           | rs3822072  | FAM13A1      | 4   | 89960292        | 2.3E-02  | 3.1E-01 | 2.9E-04        | 2.0E-02   | 3.8E-01 | 2.2E-04        | -1.0E-02 | 6.6E-01 | 5.5E-05        | -6.0E-03 | 8.2E-01 | 1.9E-05        | 4.3E-02  | 1.1E-01 | 9.8E-04        |
| 4.06           | rs2602836  | ADH5         | 4   | 100233828       | 2.5E-02  | 2.8E-01 | 3.3E-04        | 4.3E-02   | 6.3E-02 | 9.8E-04        | 4.4E-02  | 6.4E-02 | 9.9E-04        | 5.3E-02  | 4.8E-02 | 1.5E-03        | -2.1E-02 | 4.3E-01 | 2.4E-04        |
| 4.07           | rs13107325 | SLC39A8      | 4   | 103407732       | -3.2E-02 | 4.4E-01 | 1.7E-04        | -3.3E-02  | 4.2E-01 | 1.8E-04        | 1.3E-02  | 7.6E-01 | 2.6E-05        | 1.3E-02  | 7.8E-01 | 3.0E-05        | -6.4E-02 | 1.8E-01 | 6.8E-04        |
| 5.01           | rs6450176  | ARL15        | 5   | 53333782        | -2.4E-04 | 9.9E-01 | 1.9E-08        | 4.2E-03   | 8.9E-01 | 5.8E-06        | 1.3E-02  | 6.7E-01 | 5.3E-05        | 1.9E-02  | 5.8E-01 | 1.1E-04        | 3.6E-02  | 3.0E-01 | 4.1E-04        |
| 5.02           | rs9686661  | MAP3K1       | 5   | 55897543        | -2.7E-02 | 3.7E-01 | 2.3E-04        | -2.5E-02  | 4.0E-01 | 2.0E-04        | -2.1E-02 | 4.9E-01 | 1.3E-04        | -5.7E-03 | 8.7E-01 | 1.0E-05        | 6.8E-02  | 5.4E-02 | 1.4E-03        |
| 5.03           | rs12916    | HMGCR        | 5   | 74692295        | 9.1E-03  | 7.0E-01 | 4.2E-05        | 2.1E-02   | 3.7E-01 | 2.3E-04        | -6.8E-03 | 7.8E-01 | 2.3E-05        | -8.0E-04 | 9.8E-01 | 3.1E-07        | 4.4E-03  | 8.8E-01 | 9.4E-06        |
| 5.04           | rs4530754  | CSNK1G3      | 5   | 122883315       | 2.2E-03  | 9.2E-01 | 2.6E-06        | -2.4E-03  | 9.2E-01 | 3.1E-06        | -4.8E-03 | 8.4E-01 | 1.2E-05        | 3.2E-02  | 2.4E-01 | 5.1E-04        | -4.8E-02 | 7.8E-02 | 1.2E-03        |
| 5.05           | rs6882076  | TIMD4        | 5   | 156322875       | -2.7E-02 | 2.5E-01 | 3.7E-04        | -3.3E-02  | 1.6E-01 | 5.7E-04        | 2.8E-03  | 9.1E-01 | 4.0E-06        | 1.2E-02  | 6.7E-01 | 6.7E-05        | -1.6E-02 | 5.5E-01 | 1.3E-04        |
| 6.01           | rs3757354  | MYLIP        | 6   | 16235386        | 8.1E-02  | 3.2E-03 | 2.5E-03        | 6.1E-02   | 2.5E-02 | 1.4E-03        | 5.3E-02  | 5.7E-02 | 1.0E-03        | 7.0E-02  | 3.0E-02 | 1.8E-03        | 3.1E-02  | 3.4E-01 | 3.4E-04        |
| 6.02           | rs1800562  | HFE          | 6   | 26201120        | -1.1E-03 | 9.8E-01 | 1.8E-07        | -3.1E-02  | 4.8E-01 | 1.4E-04        | -4.8E-02 | 2.8E-01 | 3.3E-04        | -1.1E-02 | 8.2E-01 | 1.9E-05        | -5.7E-03 | 9.1E-01 | 5.0E-06        |
| 6.03           | rs3177928  | HLA          | 6   | 32520413        | -2.1E-02 | 5.2E-01 | 1.2E-04        | -3.0E-02  | 3.6E-01 | 2.4E-04        | -8.1E-03 | 8.1E-01 | 1.7E-05        | 4.8E-03  | 9.0E-01 | 6.2E-06        | 5.7E-02  | 1.4E-01 | 8.4E-04        |
| 6.04           | rs2814982  | C6orf106     | 6   | 34654538        | 2.5E-02  | 5.1E-01 | 1.2E-04        | 3.6E-02   | 3.5E-01 | 2.5E-04        | -5.6E-03 | 8.8E-01 | 6.1E-06        | 4.8E-02  | 2.8E-01 | 4.4E-04        | 3.5E-02  | 4.4E-01 | 2.3E-04        |
| 6.05           | rs2758886  | KCNK17       | 6   | 39358815        | 1.9E-02  | 4.5E-01 | 1.6E-04        | 2.8E-02   | 2.7E-01 | 3.5E-04        | 2.7E-02  | 2.9E-01 | 3.2E-04        | 2.1E-02  | 4.7E-01 | 2.0E-04        | -2.4E-02 | 4.2E-01 | 2.5E-04        |
| 6.06           | rs998584   | VEGFA        | 6   | 43865874        | 6.7E-03  | 7.7E-01 | 2.4E-05        | 1.8E-02   | 4.2E-01 | 1.8E-04        | 2.0E-02  | 3.9E-01 | 2.2E-04        | -2.3E-03 | 9.3E-01 | 2.6E-06        | 9.0E-02  | 8.9E-04 | 4.2E-03        |
| 6.07           | rs9488822  | FRK          | 6   | 116419586       | -5.3E-03 | 8.2E-01 | 1.4E-05        | -1.0E-02  | 6.6E-01 | 5.5E-05        | 1.0E-02  | 6.6E-01 | 5.4E-05        | 4.6E-03  | 8.7E-01 | 1.1E-05        | 2.0E-03  | 9.4E-01 | 2.0E-06        |
| 6.08           | rs1936800  | RSPO3        | 6   | 127477757       | 3.9E-02  | 9.6E-02 | 7.9E-04        | 1.8E-02   | 4.3E-01 | 1.7E-04        | 1.9E-03  | 9.4E-01 | 1.8E-06        | -2.5E-02 | 3.6E-01 | 3.0E-04        | -2.5E-02 | 3.5E-01 | 3.0E-04        |
| 6.09           | rs9376090  | HBS1L        | 6   | 135452921       | -3.6E-02 | 1.8E-01 | 5.2E-04        | -1.9E-02  | 4.7E-01 | 1.5E-04        | -2.5E-02 | 3.5E-01 | 2.5E-04        | -2.4E-02 | 4.4E-01 | 2.2E-04        | 8.8E-03  | 7.8E-01 | 3.1E-05        |
| 6.10           | rs605066   | CITED2       | 6   | 139871359       | -4.8E-02 | 3.9E-02 | 1.2E-03        | -4.8E-02  | 4.0E-02 | 1.2E-03        | -3.8E-02 | 1.1E-01 | 7.4E-04        | -1.9E-02 | 4.7E-01 | 1.9E-04        | -7.6E-03 | 7.8E-01 | 3.0E-05        |
| 6.11           | rs1564348  | LPA          | 6   | 160498850       | 5.9E-02  | 7.1E-02 | 9.3E-04        | 5.9E-02   | 7.0E-02 | 9.3E-04        | 2.3E-02  | 4.8E-01 | 1.4E-04        | 2.8E-02  | 4.6E-01 | 2.1E-04        | -4.6E-02 | 2.3E-01 | 5.6E-04        |
| 6.12           | rs10455872 | LPA - delta  | 6   | 160930108       | 4.2E-01  | 3.6E-17 | 2.0E-02        | 3.9E-01   | 2.5E-15 | 1.8E-02        | 4.4E-01  | 3.6E-18 | 2.1E-02        | 3.0E-01  | 1.1E-07 | 1.0E-02        | 6.1E-02  | 2.9E-01 | 4.3E-04        |
| 7.01           | rs1997243  | GPR146       | 7   | 1050303         | -3.0E-03 | 9.2E-01 | 2.5E-06        | -3.1E-02  | 3.2E-01 | 2.8E-04        | -1.6E-02 | 6.1E-01 | 7.5E-05        | -4.1E-02 | 2.5E-01 | 4.8E-04        | -2.5E-02 | 5.0E-01 | 1.7E-04        |
| 7.02           | rs702485   | DAGLB        | 7   | 6415797         | 4.8E-03  | 8.4E-01 | 1.2E-05        | 1.3E-02   | 5.8E-01 | 8.8E-05        | 9.9E-03  | 6.7E-01 | 5.1E-05        | 4.0E-03  | 8.8E-01 | 8.4E-06        | 2.2E-02  | 4.2E-01 | 2.4E-04        |
| 7.03           | rs4142995  | SNX13        | 7   | 17885783        | -1.6E-02 | 5.0E-01 | 1.3E-04        | -8.4E-03  | 7.2E-01 | 3.7E-05        | -6.6E-03 | 7.8E-01 | 2.2E-05        | -1.4E-02 | 6.0E-01 | 1.0E-04        | -3.7E-02 | 1.9E-01 | 6.6E-04        |
| 7.04           | rs2285942  | DNAH11       | 7   | 21549442        | -6.5E-02 | 5.2E-02 | 1.1E-03        | -6.1E-02  | 6.9E-02 | 9.4E-04        | -5.6E-02 | 9.9E-02 | 7.8E-04        | -2.7E-02 | 4.9E-01 | 1.7E-04        | -3.4E-03 | 9.3E-01 | 2.8E-06        |
| 7.05           | rs4722551  | MIR148A      | 7   | 25958351        | 1.6E-02  | 6.2E-01 | 7.0E-05        | -4.6E-03  | 8.8E-01 | 6.0E-06        | 7.1E-03  | 8.3E-01 | 1.4E-05        | -1.5E-02 | 6.7E-01 | 6.6E-05        | 1.7E-02  | 6.5E-01 | 7.9E-05        |
| 7.06           | rs2072183  | NPC1L1       | 7   | 44545705        | -9.4E-03 | 7.5E-01 | 2.9E-05        | 6.1E-04   | 9.8E-01 | 1.2E-07        | 1.4E-02  | 6.3E-01 | 6.6E-05        | -9.7E-03 | 7.8E-01 | 3.0E-05        | -2.4E-02 | 4.9E-01 | 1.8E-04        |
| 7.07           | rs4917014  | IKZF1        | 7   | 50276409        | -2.5E-02 | 3.1E-01 | 2.9E-04        | -2.1E-02  | 4.1E-01 | 2.0E-04        | -3.3E-02 | 2.0E-01 | 4.8E-04        | 5.4E-03  | 8.5E-01 | 1.3E-05        | -4.1E-02 | 1.6E-01 | 7.4E-04        |
| 7.08           | rs7811265  | MLXIPL       | 7   | 72572446        | 4.5E-02  | 1.2E-01 | 7.1E-04        | 1.5E-02   | 6.1E-01 | 7.4E-05        | 5.4E-03  | 8.5E-01 | 9.6E-06        | 1.9E-02  | 5.8E-01 | 1.2E-04        | -2.2E-02 | 5.0E-01 | 1.7E-04        |
| 7.09           | rs38855    | MET          | 7   | 116145280       | 7.6E-03  | 7.4E-01 | 3.1E-05        | 1.7E-02   | 4.7E-01 | 1.5E-04        | 4.8E-03  | 8.4E-01 | 1.2E-05        | -2.2E-02 | 4.2E-01 | 2.5E-04        | 3.3E-02  | 2.3E-01 | 5.6E-04        |
| 7.10           | rs4731702  | KLF14        | 7   | 130083924       | 2.1E-02  | 3.7E-01 | 2.2E-04        | 1.1E-02   | 6.4E-01 | 6.3E-05        | 1.9E-02  | 4.3E-01 | 1.8E-04        | 2.6E-02  | 3.3E-01 | 3.6E-04        | 1.7E-02  | 5.3E-01 | 1.5E-04        |
| 7.11           | rs17173637 | TMEM176A     | 7   | 150160382       | 6.0E-03  | 8.8E-01 | 6.1E-06        | 2.8E-02   | 5.0E-01 | 1.3E-04        | 3.1E-02  | 4.5E-01 | 1.6E-04        | 6.6E-02  | 1.7E-01 | 7.1E-04        | -7.3E-02 | 1.3E-01 | 8.8E-04        |
| 8.01           | rs9987289  | PPP1R3B      | 8   | 9220768         | -6.0E-03 | 8.8E-01 | 6.3E-06        | -2.5E-02  | 5.3E-01 | 1.1E-04        | -4.5E-02 | 2.8E-01 | 3.4E-04        | -5.1E-02 | 2.7E-01 | 4.5E-04        | 3.5E-02  | 4.5E-01 | 2.2E-04        |
| 8.02           | rs11776767 | PINX1        | 8   | 10721339        | -1.7E-02 | 4.8E-01 | 1.4E-04        | -1.6E-02  | 5.0E-01 | 1.3E-04        | -2.9E-02 | 2.4E-01 | 4.0E-04        | -1.4E-02 | 6.0E-01 | 1.0E-04        | 2.6E-02  | 3.5E-01 | 3.4E-04        |
| 8.03           | rs1495743  | NAT2         | 8   | 18317580        | -1.4E-02 | 6.3E-01 | 6.8E-05        | -1.8E-02  | 5.2E-01 | 1.2E-04        | -8.7E-03 | 7.6E-01 | 2.7E-05        | 6.5E-04  | 9.8E-01 | 1.5E-07        | 1.1E-02  | 7.3E-01 | 4.4E-05        |
| 8.04           | rs12678919 | LPL          | 8   | 19888502        | 6.2E-05  | 1.0E+00 | 7.2E-10        | -5.0E-03  | 9.0E-01 | 4.6E-06        | 1.1E-02  | 7.8E-01 | 2.2E-05        | 3.9E-04  | 9.9E-01 | 2.8E-08        | -7.0E-02 | 1.2E-01 | 9.2E-04        |
| 8.05           | rs10102164 | SOX17        | 8   | 55584167        | 5.9E-03  | 8.4E-01 | 1.2E-05        | 1.3E-02   | 6.5E-01 | 6.0E-05        | 1.2E-04  | 1.0E+00 | 4.7E-09        | -3.2E-02 | 3.5E-01 | 3.3E-04        | 2.4E-02  | 4.8E-01 | 1.9E-04        |
| 8.06           | rs1030431  | CYP7A1       | 8   | 59474251        | -2.6E-02 | 3.0E-01 | 3.1E-04        | -2.3E-02  | 3.6E-01 | 2.3E-04        | -1.5E-02 | 5.5E-01 | 1.0E-04        | 3.2E-03  | 9.1E-01 | 4.6E-06        | 1.5E-02  | 6.1E-01 | 1.0E-04        |
| 8.07           | rs2293889  | TRPS1        | 8   | 116668374       | 5.7E-02  | 1.4E-02 | 1.7E-03        | 6.9E-02   | 3.0E-03 | 2.5E-03        | 7.6E-02  | 1.2E-03 | 3.0E-03        | 2.6E-02  | 3.3E-01 | 3.5E-04        | 1.4E-02  | 6.1E-01 | 1.0E-04        |
| 8.08           | rs2954029  | TRIB1        | 8   | 126560154       | 4.3E-03  | 8.5E-01 | 9.6E-06        | -5.5E-03  | 8.1E-01 | 1.6E-05        | 8.9E-03  | 7.1E-01 | 4.1E-05        | 2.1E-02  | 4.4E-01 | 2.2E-04        | -4.0E-02 | 1.4E-01 | 8.3E-04        |
| 8.09           | rs11136341 | PLEC1        | 8   | 145115531       | -3.9E-04 | 9.9E-01 | 7.0E-08        | 2.7E-03   | 9.1E-01 | 3.4E-06        | -8.9E-03 | 7.2E-01 | 3.6E-05        | 3.5E-03  | 9.0E-01 | 5.8E-06        | -1.5E-02 | 5.9E-01 | 1.1E-04        |
| 9.01           | rs3780181  | VLDLR        | 9   | 2630759         | 1.9E-02  | 6.9E-01 | 4.7E-05        | 1.2E-03   | 9.8E-01 | 1.8E-07        | 1.4E-02  | 7.7E-01 | 2.5E-05        | 7.0E-02  | 2.0E-01 | 6.2E-04        | 7.3E-03  | 8.9E-01 | 6.7E-06        |
| 9.02           | rs643531   | TTC39B       | 9   | 15286034        | 3.9E-02  | 2.5E-01 | 3.8E-04        | 2.3E-02   | 4.9E-01 | 1.3E-04        | 3.8E-02  | 2.7E-01 | 3.5E-04        | 6.4E-02  | 1.0E-01 | 1.0E-03        | -7.4E-02 | 6.2E-02 | 1.3E-03        |
| 9.03           | rs1883025  | ABCA1        | 9   | 106704122       | -1.6E-02 | 5.4E-01 | 1.1E-04        | -1.0E-02  | 7.0E-01 | 4.3E-05        | 2.8E-03  | 9.1E-01 | 3.3E-06        | -4.5E-03 | 8.8E-01 | 8.5E-06        | -1.9E-02 | 5.3E-01 | 1.5E-04        |
| 9.04           | rs649129   | ABO          | 9   | 135144125       | 5.9E-02  | 4.2E-02 | 1.2E-03        | 4.8E-02   | 1.0E-01 | 7.6E-04        | 3.8E-02  | 2.0E-01 | 4.7E-04        | 6.3E-03  | 8.5E-01 | 1.3E-05        | -3.2E-02 | 3.6E-01 | 3.2E-04        |
| 10.01          | rs1832007  | AKR1C4       | 10  | 5244847         | -8.2E-02 | 1.2E-02 | 1.8E-03        | -5.4E-02  | 9.6E-02 | 7.8E-04        | -5.4E-02 | 1.0E-01 | 7.6E-04        | 2.2E-02  | 5.6E-01 | 1.3E-04        | -2.4E-02 | 5.3E-01 | 1.5E-04        |
| 10.02          | rs10904908 | TRDMT1       | 10  | 17300296        | -1.7E-02 | 4.7E-01 | 1.5E-04        | -2.7E-02  | 2.4E-01 | 3.9E-04        | -2.9E-02 | 2.2E-01 | 4.4E-04        | -8.0E-03 | 7.7E-01 | 3.2E-05        | -3.6E-02 | 1.9E-01 | 6.5E-04        |
| 10.03          | rs970548   | MARCH8-ALOX5 | 10  | 45333283        | 3.7E-02  | 1.5E-01 | 5.9E-04        | 3.5E-02   | 1.8E-01 | 5.2E-04        | 1.5E-02  | 5.6E-01 | 9.8E-05        | 6.1E-03  | 8.4E-01 | 1.5E-05        | 1.4E-02  | 6.6E-01 | 7.6E-05        |
| 10.04          | rs10761731 | JMJD1C       | 10  | 64697616        | -2.1E-02 | 3.7E-01 | 2.3E-04        | -2.0E-02  | 3.9E-01 | 2.1E-04        | -1.8E-02 | 4.5E-01 | 1.6E-04        | 5.6E-03  | 8.4E-01 | 1.6E-05        | -1.3E-02 | 6.4E-01 | 8.6E-05        |

| Cluster number | rsID       | Locus Name             | Chr | Position (hg18) | LDL-C    |         |                | non-HDL-C |         |                | apo B    |         |                | LDL-P    |         |                | LDL-size |         |                |
|----------------|------------|------------------------|-----|-----------------|----------|---------|----------------|-----------|---------|----------------|----------|---------|----------------|----------|---------|----------------|----------|---------|----------------|
|                |            |                        |     |                 | Beta (q) | P-value | R <sup>2</sup> | Beta (q)  | P-value | R <sup>2</sup> | Beta (q) | P-value | R <sup>2</sup> | Beta (q) | P-value | R <sup>2</sup> | Beta (q) | P-value | R <sup>2</sup> |
| 10.05          | rs2068888  | <i>CYP26A1</i>         | 10  | 94829632        | -2.1E-02 | 3.7E-01 | 2.3E-04        | -1.4E-02  | 5.5E-01 | 1.0E-04        | 1.3E-02  | 5.9E-01 | 8.3E-05        | -4.5E-03 | 8.7E-01 | 1.1E-05        | 4.5E-03  | 8.7E-01 | 1.1E-05        |
| 10.06          | rs2255141  | <i>GPAM</i>            | 10  | 113923876       | 5.2E-02  | 4.4E-02 | 1.2E-03        | 4.2E-02   | 1.0E-01 | 7.6E-04        | 4.9E-02  | 6.2E-02 | 1.0E-03        | 1.9E-02  | 5.2E-01 | 1.5E-04        | 9.3E-03  | 7.6E-01 | 3.6E-05        |
| 11.01          | rs2923084  | <i>AMPD3</i>           | 11  | 10345358        | 2.1E-02  | 5.0E-01 | 1.3E-04        | 3.9E-02   | 1.9E-01 | 4.9E-04        | 4.1E-02  | 1.8E-01 | 5.1E-04        | 7.9E-02  | 2.5E-02 | 1.9E-03        | 1.9E-02  | 5.9E-01 | 1.1E-04        |
| 11.02          | rs10832963 | <i>SPTY2D1</i>         | 11  | 18620817        | 2.3E-02  | 3.8E-01 | 2.2E-04        | 2.7E-02   | 3.0E-01 | 3.1E-04        | 4.6E-02  | 8.4E-02 | 8.6E-04        | 4.3E-02  | 1.6E-01 | 7.2E-04        | -1.7E-03 | 9.6E-01 | 1.1E-06        |
| 11.03          | rs3136441  | <i>LRP4</i>            | 11  | 46699823        | -1.2E-02 | 7.3E-01 | 3.5E-05        | -2.5E-03  | 9.4E-01 | 1.6E-06        | 9.4E-03  | 7.8E-01 | 2.2E-05        | 8.9E-03  | 8.2E-01 | 2.0E-05        | -6.4E-03 | 8.7E-01 | 1.0E-05        |
| 11.04          | rs11246602 | <i>OR4C46</i>          | 11  | 51368666        | 4.5E-02  | 2.1E-01 | 4.7E-04        | 2.5E-02   | 4.7E-01 | 1.5E-04        | 7.3E-02  | 4.4E-02 | 1.2E-03        | 4.0E-02  | 3.4E-01 | 3.4E-04        | -5.4E-02 | 2.1E-01 | 6.2E-04        |
| 11.05          | rs174546   | <i>FADS123</i>         | 11  | 61326406        | 3.9E-02  | 1.1E-01 | 7.3E-04        | 5.9E-02   | 1.5E-02 | 1.7E-03        | 5.2E-02  | 3.5E-02 | 1.3E-03        | 4.0E-02  | 1.6E-01 | 7.4E-04        | -4.7E-03 | 8.7E-01 | 1.0E-05        |
| 11.06          | rs12801636 | <i>KAT5</i>            | 11  | 65147893        | -1.9E-02 | 4.9E-01 | 1.3E-04        | -2.9E-02  | 3.0E-01 | 3.1E-04        | -5.5E-03 | 8.5E-01 | 1.1E-05        | -2.9E-02 | 3.7E-01 | 3.0E-04        | -4.4E-02 | 1.8E-01 | 6.8E-04        |
| 11.07          | rs499974   | <i>MOGAT2-DGAT2</i>    | 11  | 75132669        | -3.4E-02 | 2.8E-01 | 3.4E-04        | -3.5E-02  | 2.7E-01 | 3.5E-04        | -3.9E-02 | 2.2E-01 | 4.3E-04        | -1.4E-02 | 7.1E-01 | 5.2E-05        | -8.0E-03 | 8.3E-01 | 1.8E-05        |
| 11.08          | rs964184   | <i>APOA1C3A4A5</i>     | 11  | 116154127       | 8.7E-03  | 8.0E-01 | 1.8E-05        | 2.9E-02   | 4.1E-01 | 1.9E-04        | 2.3E-02  | 5.1E-01 | 1.2E-04        | -2.3E-02 | 5.7E-01 | 1.2E-04        | 1.7E-01  | 4.7E-05 | 6.3E-03        |
| 11.09          | rs11603023 | <i>PHLDB1</i>          | 11  | 117991277       | 2.5E-02  | 2.9E-01 | 3.3E-04        | 1.1E-02   | 6.4E-01 | 6.2E-05        | -1.1E-02 | 6.5E-01 | 6.0E-05        | 1.7E-02  | 5.4E-01 | 1.4E-04        | -1.7E-03 | 9.5E-01 | 1.4E-06        |
| 11.10          | rs7941030  | <i>UBASH3B</i>         | 11  | 122027585       | 1.7E-03  | 9.4E-01 | 1.5E-06        | 9.9E-03   | 6.8E-01 | 4.9E-05        | 1.4E-02  | 5.6E-01 | 1.0E-04        | 3.6E-02  | 1.9E-01 | 6.4E-04        | 1.8E-02  | 5.1E-01 | 1.6E-04        |
| 11.11          | rs11220462 | <i>ST3GAL4</i>         | 11  | 125749162       | 9.1E-02  | 1.1E-02 | 1.8E-03        | 8.0E-02   | 2.4E-02 | 1.4E-03        | 7.2E-02  | 4.8E-02 | 1.1E-03        | 6.0E-02  | 1.6E-01 | 7.4E-04        | 5.7E-04  | 9.9E-01 | 6.8E-08        |
| 12.01          | rs4883201  | <i>PHC1-A2ML1</i>      | 12  | 8973848         | 1.7E-02  | 6.6E-01 | 5.4E-05        | 3.5E-02   | 3.6E-01 | 2.4E-04        | 7.2E-03  | 8.5E-01 | 9.8E-06        | -3.8E-02 | 3.9E-01 | 2.7E-04        | -1.7E-02 | 7.1E-01 | 5.3E-05        |
| 12.02          | rs1734375  | <i>PDE3A</i>           | 12  | 20365025        | -5.5E-02 | 2.1E-02 | 1.5E-03        | -5.4E-02  | 2.1E-02 | 1.5E-03        | -4.8E-02 | 4.7E-02 | 1.1E-03        | -3.3E-02 | 2.2E-01 | 5.6E-04        | 1.8E-02  | 5.0E-01 | 1.7E-04        |
| 12.03          | rs12317268 | <i>SLCO1B1 - delta</i> | 12  | 21243808        | 1.3E-01  | 6.5E-05 | 4.5E-03        | 1.4E-01   | 1.3E-05 | 5.4E-03        | 1.4E-01  | 1.5E-05 | 5.4E-03        | 7.5E-02  | 3.8E-02 | 1.6E-03        | 8.6E-02  | 1.9E-02 | 2.1E-03        |
| 12.04          | rs11613352 | <i>LRP1</i>            | 12  | 56078847        | 1.4E-02  | 6.0E-01 | 7.8E-05        | 9.3E-04   | 9.7E-01 | 3.2E-07        | 1.7E-02  | 5.5E-01 | 1.0E-04        | 2.8E-02  | 3.7E-01 | 2.9E-04        | -8.0E-03 | 8.1E-01 | 2.3E-05        |
| 12.05          | rs7134594  | <i>MVK</i>             | 12  | 108484576       | 2.8E-02  | 2.4E-01 | 3.9E-04        | 3.2E-03   | 8.9E-01 | 5.3E-06        | 1.5E-02  | 5.2E-01 | 1.2E-04        | 1.8E-02  | 5.1E-01 | 1.6E-04        | 4.2E-02  | 1.3E-01 | 8.9E-04        |
| 12.06          | rs11065987 | <i>BRAP</i>            | 12  | 110556807       | 3.5E-03  | 8.8E-01 | 6.5E-06        | -1.7E-02  | 4.8E-01 | 1.4E-04        | -1.7E-02 | 4.7E-01 | 1.5E-04        | -1.0E-02 | 7.1E-01 | 5.2E-05        | -2.5E-03 | 9.3E-01 | 3.0E-06        |
| 12.07          | rs1169288  | <i>HNF1A</i>           | 12  | 119901033       | 1.7E-02  | 5.1E-01 | 1.2E-04        | 1.2E-02   | 6.5E-01 | 5.8E-05        | -6.2E-03 | 8.1E-01 | 1.6E-05        | -2.0E-03 | 9.5E-01 | 1.6E-06        | 1.8E-02  | 5.7E-01 | 1.3E-04        |
| 12.08          | rs4759375  | <i>SBNO1</i>           | 12  | 122362191       | 8.1E-02  | 4.1E-02 | 1.2E-03        | 6.2E-02   | 1.2E-01 | 6.8E-04        | 7.4E-02  | 6.9E-02 | 9.5E-04        | 9.9E-02  | 3.4E-02 | 1.7E-03        | 1.2E-02  | 8.0E-01 | 2.5E-05        |
| 12.09          | rs4765127  | <i>ZNF664</i>          | 12  | 123026120       | 3.2E-02  | 1.8E-01 | 5.0E-04        | 2.9E-02   | 2.4E-01 | 4.0E-04        | 3.2E-02  | 1.9E-01 | 4.9E-04        | 4.3E-02  | 1.3E-01 | 8.7E-04        | 1.9E-02  | 5.0E-01 | 1.7E-04        |
| 12.10          | rs838880   | <i>SCARB1</i>          | 12  | 123827546       | -3.9E-02 | 1.2E-01 | 6.9E-04        | -3.3E-02  | 1.8E-01 | 5.1E-04        | -4.6E-02 | 6.9E-02 | 9.5E-04        | -2.2E-02 | 4.4E-01 | 2.2E-04        | -2.3E-02 | 4.3E-01 | 2.4E-04        |
| 13.01          | rs4942486  | <i>BRCA2</i>           | 13  | 31851388        | 2.1E-02  | 3.7E-01 | 2.3E-04        | 1.5E-02   | 5.0E-01 | 1.3E-04        | 1.6E-02  | 5.0E-01 | 1.3E-04        | -1.9E-02 | 4.9E-01 | 1.8E-04        | 9.2E-03  | 7.4E-01 | 4.4E-05        |
| 14.01          | rs2332328  | <i>NYNRIN</i>          | 14  | 23952898        | -3.1E-02 | 1.8E-01 | 5.1E-04        | -2.0E-02  | 3.8E-01 | 2.2E-04        | -2.7E-02 | 2.6E-01 | 3.7E-04        | 5.7E-03  | 8.3E-01 | 1.7E-05        | -3.9E-02 | 1.5E-01 | 8.0E-04        |
| 14.02          | rs4983559  | <i>ZBTB42-AKT1</i>     | 14  | 104348254       | -2.6E-02 | 2.9E-01 | 3.2E-04        | -2.0E-02  | 4.1E-01 | 2.0E-04        | -2.0E-02 | 4.2E-01 | 1.9E-04        | 2.2E-02  | 4.2E-01 | 2.4E-04        | -2.7E-02 | 3.3E-01 | 3.6E-04        |
| 15.01          | rs8035382  | <i>FRMD5</i>           | 15  | 42031815        | -4.7E-02 | 3.9E-01 | 2.1E-04        | -4.3E-02  | 4.3E-01 | 1.7E-04        | -4.2E-02 | 4.5E-01 | 1.7E-04        | -6.3E-02 | 3.2E-01 | 3.7E-04        | 4.0E-02  | 5.4E-01 | 1.4E-04        |
| 15.02          | rs1532085  | <i>LIPC</i>            | 15  | 56470658        | 8.1E-03  | 7.3E-01 | 3.3E-05        | -8.1E-03  | 7.3E-01 | 3.3E-05        | -9.9E-03 | 6.8E-01 | 4.7E-05        | 3.0E-02  | 2.8E-01 | 4.4E-04        | -4.1E-02 | 1.5E-01 | 7.9E-04        |
| 15.03          | rs2652834  | <i>LACTB</i>           | 15  | 61183920        | 1.2E-02  | 6.8E-01 | 4.9E-05        | 9.0E-03   | 7.6E-01 | 2.8E-05        | -1.9E-02 | 5.1E-01 | 1.3E-04        | 3.4E-02  | 3.1E-01 | 3.9E-04        | -3.9E-03 | 9.1E-01 | 5.3E-06        |
| 16.01          | rs3198697  | <i>PDXDC1</i>          | 16  | 15037441        | 1.7E-02  | 4.7E-01 | 1.5E-04        | -1.6E-03  | 9.5E-01 | 1.3E-06        | -1.7E-04 | 9.9E-01 | 1.5E-08        | 2.0E-02  | 4.5E-01 | 2.1E-04        | -2.8E-02 | 3.1E-01 | 3.9E-04        |
| 16.02          | rs11649653 | <i>CTF1</i>            | 16  | 30825988        | -1.3E-02 | 5.9E-01 | 8.1E-05        | -1.7E-02  | 4.8E-01 | 1.4E-04        | -4.4E-02 | 6.8E-02 | 9.6E-04        | -4.2E-02 | 1.2E-01 | 8.8E-04        | -3.5E-02 | 2.1E-01 | 6.1E-04        |
| 16.03          | rs1121980  | <i>FTO</i>             | 16  | 52366748        | -2.2E-02 | 3.6E-01 | 2.4E-04        | -2.7E-02  | 2.4E-01 | 3.9E-04        | -2.0E-02 | 3.9E-01 | 2.1E-04        | -2.0E-02 | 4.5E-01 | 2.1E-04        | 2.6E-02  | 3.5E-01 | 3.4E-04        |
| 16.04          | rs3764261  | <i>CETP</i>            | 16  | 55550825        | -1.2E-02 | 6.4E-01 | 6.3E-05        | -1.1E-02  | 6.5E-01 | 5.8E-05        | 1.1E-02  | 6.5E-01 | 5.9E-05        | -2.7E-02 | 3.4E-01 | 3.3E-04        | -1.1E-01 | 1.3E-04 | 5.6E-03        |
| 16.05          | rs16942887 | <i>LCAT</i>            | 16  | 66485543        | 4.1E-02  | 2.4E-01 | 3.9E-04        | 3.1E-02   | 3.8E-01 | 2.2E-04        | 7.1E-02  | 4.9E-02 | 1.1E-03        | 4.4E-02  | 2.9E-01 | 4.1E-04        | 5.5E-04  | 9.9E-01 | 6.6E-08        |
| 16.06          | rs2000999  | <i>HPR</i>             | 16  | 70665594        | 2.6E-02  | 3.9E-01 | 2.1E-04        | 3.1E-02   | 3.2E-01 | 2.9E-04        | 1.7E-02  | 5.8E-01 | 8.6E-05        | 5.4E-02  | 1.3E-01 | 8.6E-04        | -4.3E-02 | 2.3E-01 | 5.6E-04        |
| 16.07          | rs2925979  | <i>CMIP</i>            | 16  | 80092291        | -1.7E-02 | 5.0E-01 | 1.3E-04        | -1.5E-02  | 5.6E-01 | 9.6E-05        | -4.0E-02 | 1.2E-01 | 6.9E-04        | 1.5E-02  | 6.0E-01 | 9.9E-05        | 3.3E-02  | 2.7E-01 | 4.7E-04        |
| 17.01          | rs314253   | <i>DLG4</i>            | 17  | 7032374         | -2.2E-02 | 3.6E-01 | 2.4E-04        | -8.3E-03  | 7.3E-01 | 3.3E-05        | -2.3E-02 | 3.6E-01 | 2.5E-04        | -1.4E-03 | 9.6E-01 | 9.8E-07        | 2.2E-02  | 4.3E-01 | 2.4E-04        |
| 17.02          | rs881844   | <i>STARD3</i>          | 17  | 35063744        | -4.0E-04 | 9.9E-01 | 7.8E-08        | -1.1E-03  | 9.6E-01 | 6.2E-07        | 6.4E-03  | 8.0E-01 | 1.9E-05        | 2.4E-02  | 4.1E-01 | 2.6E-04        | 1.7E-02  | 5.5E-01 | 1.4E-04        |
| 17.03          | rs8077889  | <i>MPP3</i>            | 17  | 39233692        | 1.2E-02  | 6.8E-01 | 5.0E-05        | 4.2E-02   | 1.4E-01 | 6.3E-04        | 2.6E-02  | 3.6E-01 | 2.4E-04        | -1.2E-02 | 7.1E-01 | 5.2E-05        | -4.3E-02 | 1.9E-01 | 6.5E-04        |
| 17.04          | rs7225700  | <i>OSBPL7</i>          | 17  | 42746803        | -5.7E-03 | 8.1E-01 | 1.6E-05        | -2.0E-02  | 4.2E-01 | 1.9E-04        | -2.3E-02 | 3.5E-01 | 2.5E-04        | -1.2E-02 | 6.8E-01 | 6.5E-05        | -1.8E-02 | 5.2E-01 | 1.6E-04        |
| 17.05          | rs1801689  | <i>APOH-PRXCA</i>      | 17  | 61641042        | 1.3E-01  | 4.7E-02 | 1.1E-03        | 1.0E-01   | 1.3E-01 | 6.5E-04        | 4.8E-02  | 4.8E-01 | 1.4E-04        | 1.1E-01  | 1.6E-01 | 7.3E-04        | -8.0E-02 | 3.2E-01 | 3.8E-04        |
| 17.06          | rs4148008  | <i>ABCA8</i>           | 17  | 64386889        | 5.2E-02  | 4.0E-02 | 1.2E-03        | 1.7E-02   | 4.9E-01 | 1.4E-04        | 2.0E-02  | 4.4E-01 | 1.7E-04        | -8.2E-03 | 7.8E-01 | 2.9E-05        | 3.3E-02  | 2.7E-01 | 4.7E-04        |
| 17.07          | rs4082919  | <i>PGS1</i>            | 17  | 73889077        | 2.0E-02  | 3.9E-01 | 2.1E-04        | 2.2E-02   | 3.4E-01 | 2.6E-04        | -8.4E-04 | 9.7E-01 | 3.7E-07        | 6.6E-04  | 9.8E-01 | 2.2E-07        | -5.1E-02 | 6.3E-02 | 1.3E-03        |
| 18.01          | rs7241918  | <i>LIPG</i>            | 18  | 45414951        | 5.7E-02  | 6.3E-02 | 9.9E-04        | 5.9E-02   | 5.2E-02 | 1.1E-03        | 2.0E-02  | 5.2E-01 | 1.2E-04        | 4.0E-02  | 2.6E-01 | 4.8E-04        | -1.7E-03 | 9.6E-01 | 8.9E-07        |
| 18.02          | rs12967135 | <i>MC4R</i>            | 18  | 56000003        | -2.4E-02 | 3.9E-01 | 2.1E-04        | -1.3E-02  | 6.3E-01 | 6.6E-05        | -2.5E-02 | 3.8E-01 | 2.2E-04        | -2.0E-02 | 5.3E-01 | 1.5E-04        | -7.0E-02 | 3.0E-02 | 1.8E-03        |
| 19.01          | rs7248104  | <i>INSR</i>            | 19  | 7175431         | -3.9E-02 | 1.0E-01 | 7.7E-04        | -2.0E-02  | 4.1E-01 | 2.0E-04        | -4.3E-02 | 7.2E-02 | 9.3E-04        | -2.3E-02 | 4.1E-01 | 2.5E-04        | 3.5E-03  | 9.0E-01 | 6.0E-06        |
| 19.02          | rs7255436  | <i>ANGPTLA</i>         | 19  | 8339196         | 1.3E-02  | 5.8E-01 | 8.6E-05        | 2.8E-02   | 2.2E-01 | 4.3E-04        | 3.2E-02  | 1.7E-01 | 5.3E-04        | -3.0E-02 | 2.5E-01 | 4.9E-04        | 2.4E-02  | 3.7E-01 | 3.1E-04        |
| 19.03          | rs11672123 | <i>LDLR - delta</i>    | 19  | 11055823        | 8.8E-02  | 1.1E-01 | 7.5E-04        | 7.5E-02   | 1.7E-01 | 5.4E-04        | 8.1E-02  | 1.4E-01 | 6.3E-04        | 6.4E-02  | 3.0E-01 | 3.9E-04        | -9.9E-02 | 1.2E-01 | 9.5E-04        |



| Cluster number | rsID       | Locus Name          | Chr | Position (hg18) | LDL-C    |         |                | non-HDL-C |         |                | apo B    |         |                | LDL-P    |         |                | LDL-size |         |                |
|----------------|------------|---------------------|-----|-----------------|----------|---------|----------------|-----------|---------|----------------|----------|---------|----------------|----------|---------|----------------|----------|---------|----------------|
|                |            |                     |     |                 | Beta (q) | P-value | R <sup>2</sup> | Beta (q)  | P-value | R <sup>2</sup> | Beta (q) | P-value | R <sup>2</sup> | Beta (q) | P-value | R <sup>2</sup> | Beta (q) | P-value | R <sup>2</sup> |
| 19.04          | rs6511720  | <i>LDLR</i>         | 19  | 11063306        | -7.1E-02 | 2.7E-02 | 1.4E-03        | -4.1E-02  | 2.0E-01 | 4.7E-04        | -3.0E-02 | 3.5E-01 | 2.5E-04        | -4.9E-02 | 1.8E-01 | 6.6E-04        | -3.2E-02 | 3.9E-01 | 2.8E-04        |
| 19.05          | rs737337   | <i>LOC55908</i>     | 19  | 11208493        | -4.1E-02 | 3.4E-01 | 2.7E-04        | -3.5E-02  | 4.2E-01 | 1.9E-04        | -5.2E-02 | 2.3E-01 | 4.2E-04        | -8.7E-02 | 8.2E-02 | 1.1E-03        | -7.3E-03 | 8.8E-01 | 8.0E-06        |
| 19.06          | rs10401969 | <i>CILP2</i>        | 19  | 19268718        | 4.3E-02  | 2.9E-01 | 3.2E-04        | 6.3E-02   | 1.3E-01 | 6.7E-04        | 1.6E-01  | 1.5E-04 | 4.1E-03        | 1.2E-01  | 1.2E-02 | 2.3E-03        | -3.4E-02 | 4.7E-01 | 2.0E-04        |
| 19.07          | rs731839   | <i>PEPD</i>         | 19  | 38590905        | 1.8E-02  | 4.6E-01 | 1.6E-04        | 1.9E-02   | 4.4E-01 | 1.7E-04        | -4.9E-03 | 8.4E-01 | 1.1E-05        | 2.4E-02  | 3.9E-01 | 2.7E-04        | -1.3E-02 | 6.4E-01 | 8.1E-05        |
| 19.08          | rs7412     | <i>APOE - delta</i> | 19  | 50103919        | -2.8E-01 | 3.4E-16 | 1.9E-02        | -2.1E-01  | 3.8E-10 | 1.1E-02        | -1.6E-01 | 2.3E-06 | 6.4E-03        | -1.4E-01 | 5.2E-04 | 4.5E-03        | 6.0E-02  | 1.4E-01 | 8.1E-04        |
| 19.09          | rs4420638  | <i>APOEC1C2</i>     | 19  | 50114786        | 1.1E-01  | 1.9E-03 | 2.7E-03        | 9.7E-02   | 6.8E-03 | 2.1E-03        | 3.5E-02  | 3.4E-01 | 2.6E-04        | -7.5E-03 | 8.6E-01 | 1.2E-05        | 4.9E-02  | 2.5E-01 | 5.1E-04        |
| 19.10          | rs492602   | <i>FLJ36070</i>     | 19  | 53898229        | 1.6E-02  | 4.8E-01 | 1.4E-04        | 1.6E-02   | 4.8E-01 | 1.4E-04        | 2.4E-02  | 3.0E-01 | 3.1E-04        | 2.0E-02  | 4.5E-01 | 2.1E-04        | 3.2E-02  | 2.4E-01 | 5.2E-04        |
| 19.11          | rs17695224 | <i>HAS1</i>         | 19  | 57016028        | 1.2E-03  | 9.6E-01 | 6.8E-07        | 2.7E-02   | 3.0E-01 | 3.1E-04        | 6.6E-03  | 8.0E-01 | 1.8E-05        | 9.1E-03  | 7.5E-01 | 3.6E-05        | -2.8E-02 | 3.4E-01 | 3.4E-04        |
| 19.12          | rs386000   | <i>LILRA3</i>       | 19  | 59484573        | 2.4E-03  | 9.3E-01 | 2.2E-06        | 1.2E-02   | 6.6E-01 | 5.4E-05        | 4.3E-02  | 1.3E-01 | 6.6E-04        | 2.4E-02  | 4.7E-01 | 2.0E-04        | -1.6E-02 | 6.2E-01 | 9.5E-05        |
| 20.01          | rs364585   | <i>SPTLC3</i>       | 20  | 12910718        | -3.3E-02 | 1.7E-01 | 5.5E-04        | -2.7E-02  | 2.5E-01 | 3.7E-04        | -3.8E-02 | 1.2E-01 | 7.1E-04        | -2.0E-02 | 4.6E-01 | 2.0E-04        | 1.0E-02  | 7.1E-01 | 5.1E-05        |
| 20.02          | rs2328223  | <i>SNX5</i>         | 20  | 17793921        | 3.1E-03  | 9.2E-01 | 3.0E-06        | 1.6E-02   | 5.9E-01 | 8.4E-05        | 4.8E-03  | 8.8E-01 | 7.0E-06        | 3.1E-02  | 3.7E-01 | 3.0E-04        | 4.8E-02  | 1.7E-01 | 7.2E-04        |
| 20.03          | rs2277862  | <i>ERGIC3</i>       | 20  | 33616196        | -2.4E-02 | 4.7E-01 | 1.5E-04        | -3.0E-02  | 3.5E-01 | 2.5E-04        | -4.6E-02 | 1.6E-01 | 5.7E-04        | -8.0E-02 | 3.2E-02 | 1.7E-03        | 7.1E-02  | 6.1E-02 | 1.3E-03        |
| 20.04          | rs2902940  | <i>MAFB</i>         | 20  | 38524901        | -9.3E-04 | 9.7E-01 | 3.7E-07        | -2.4E-03  | 9.2E-01 | 2.6E-06        | -1.1E-02 | 6.9E-01 | 4.7E-05        | -1.4E-03 | 9.6E-01 | 8.0E-07        | -3.5E-02 | 2.5E-01 | 5.1E-04        |
| 20.05          | rs909802   | <i>TOP1</i>         | 20  | 39370229        | 3.3E-03  | 8.9E-01 | 5.7E-06        | 7.1E-03   | 7.6E-01 | 2.6E-05        | -1.8E-02 | 4.5E-01 | 1.6E-04        | -3.0E-02 | 2.6E-01 | 4.7E-04        | -3.8E-03 | 8.9E-01 | 7.2E-06        |
| 20.06          | rs1800961  | <i>HNF4A</i>        | 20  | 42475778        | 6.6E-03  | 9.3E-01 | 2.5E-06        | -2.7E-02  | 7.0E-01 | 4.2E-05        | -2.4E-02 | 7.4E-01 | 3.3E-05        | -6.9E-02 | 4.1E-01 | 2.6E-04        | 1.2E-02  | 8.9E-01 | 7.7E-06        |
| 20.07          | rs6065906  | <i>PLTP</i>         | 20  | 43987422        | -3.6E-02 | 2.3E-01 | 4.1E-04        | -4.7E-02  | 1.2E-01 | 6.9E-04        | -5.8E-02 | 6.0E-02 | 1.0E-03        | -5.5E-02 | 1.2E-01 | 9.2E-04        | -1.7E-02 | 6.3E-01 | 8.8E-05        |
| 22.01          | rs181362   | <i>UBE2L3</i>       | 22  | 20262068        | 9.7E-03  | 7.4E-01 | 3.1E-05        | 2.3E-02   | 4.2E-01 | 1.8E-04        | 3.7E-02  | 2.1E-01 | 4.5E-04        | 2.2E-02  | 5.1E-01 | 1.6E-04        | -1.3E-03 | 9.7E-01 | 5.6E-07        |
| 22.02          | rs5763662  | <i>MTMR3</i>        | 22  | 28708703        | -6.5E-02 | 3.7E-01 | 2.3E-04        | -4.6E-02  | 5.3E-01 | 1.1E-04        | -1.1E-01 | 1.3E-01 | 6.4E-04        | -3.6E-02 | 6.8E-01 | 6.4E-05        | 7.3E-02  | 4.0E-01 | 2.6E-04        |
| 22.03          | rs138777   | <i>TOM1</i>         | 22  | 34041098        | 1.8E-02  | 4.6E-01 | 1.6E-04        | 4.0E-02   | 1.0E-01 | 7.7E-04        | 1.7E-02  | 5.0E-01 | 1.3E-04        | 3.5E-02  | 2.2E-01 | 5.6E-04        | 6.4E-03  | 8.2E-01 | 1.9E-05        |
| 22.04          | rs5756931  | <i>PLA2G6</i>       | 22  | 36875979        | -7.4E-03 | 7.6E-01 | 2.7E-05        | -1.6E-02  | 5.2E-01 | 1.2E-04        | -2.4E-02 | 3.3E-01 | 2.8E-04        | 9.6E-03  | 7.3E-01 | 4.5E-05        | -2.9E-02 | 2.9E-01 | 4.2E-04        |
| 22.05          | rs4253772  | <i>PPARA</i>        | 22  | 45006267        |          | 7.6E-01 | 2.6E-05        |           | 4.8E-01 | 1.4E-04        |          | 7.4E-01 | 3.2E-05        |          | 2.2E-01 | 5.7E-04        |          | 1.9E-01 | 6.6E-04        |

Cluster number: unique numeric identifier for each of the SNPs in the analysis

rsID: SNP name

Chr: chromosome

Beta (q): Beta-coefficient from inverse-quantile transformed data

R<sup>2</sup>: variance explained by SNP

**Supplemental Table 6c:** Association results for index variants in each candidate region tested and association with absolute change in LDL-C, non-HDL-C, apo B, LDL-P and LDL-size among the placebo allocated arm only.

| Cluster number | rsID       | Locus Name           | Chr | Position (hg18) | LDL-C    |         |                | non-HDL-C |         |                | apo B    |         |                | LDL-P    |         |                | LDL-size |         |                |
|----------------|------------|----------------------|-----|-----------------|----------|---------|----------------|-----------|---------|----------------|----------|---------|----------------|----------|---------|----------------|----------|---------|----------------|
|                |            |                      |     |                 | Beta (q) | P-value | R <sup>2</sup> | Beta (q)  | P-value | R <sup>2</sup> | Beta (q) | P-value | R <sup>2</sup> | Beta (q) | P-value | R <sup>2</sup> | Beta (q) | P-value | R <sup>2</sup> |
| 1.01           | rs1077514  | <i>ASAP3</i>         | 1   | 23638820        | 5.5E-03  | 8.7E-01 | 7.8E-06        | -4.5E-03  | 8.9E-01 | 5.3E-06        | -2.7E-02 | 4.3E-01 | 1.8E-04        | -3.1E-02 | 4.1E-01 | 2.3E-04        | 2.5E-02  | 5.1E-01 | 1.5E-04        |
| 1.02           | rs12027135 | <i>LDLRAP1</i>       | 1   | 25648320        | -1.1E-02 | 6.6E-01 | 5.8E-05        | -2.5E-03  | 9.1E-01 | 3.3E-06        | -1.4E-02 | 5.5E-01 | 1.0E-04        | -1.1E-02 | 6.8E-01 | 6.0E-05        | -3.5E-02 | 1.8E-01 | 6.2E-04        |
| 1.03           | rs12748152 | <i>PIGV-NROB2</i>    | 1   | 27010980        | -5.1E-02 | 2.6E-01 | 3.7E-04        | -7.3E-02  | 1.1E-01 | 7.5E-04        | -2.4E-02 | 6.0E-01 | 8.0E-05        | -1.5E-02 | 7.7E-01 | 3.0E-05        | -3.5E-02 | 4.8E-01 | 1.7E-04        |
| 1.04           | rs4660293  | <i>PABPC4</i>        | 1   | 39800767        | -2.8E-03 | 9.2E-01 | 2.9E-06        | -4.7E-03  | 8.7E-01 | 8.3E-06        | -4.6E-03 | 8.7E-01 | 7.7E-06        | 3.6E-02  | 2.4E-01 | 4.7E-04        | -8.8E-03 | 7.8E-01 | 2.8E-05        |
| 1.05           | rs2479409  | <i>PCSK9</i>         | 1   | 55277238        | 1.2E-02  | 6.4E-01 | 6.3E-05        | -2.2E-03  | 9.3E-01 | 2.2E-06        | 2.2E-02  | 3.8E-01 | 2.2E-04        | 5.3E-02  | 5.6E-02 | 1.3E-03        | 5.2E-02  | 5.8E-02 | 1.2E-03        |
| 1.06           | rs17111584 | <i>PCSK9 - delta</i> | 1   | 55319284        | 4.6E-02  | 4.3E-01 | 1.8E-04        | 7.8E-03   | 8.9E-01 | 5.4E-06        | 2.0E-02  | 7.3E-01 | 3.5E-05        | 3.0E-02  | 6.4E-01 | 7.6E-05        | 3.1E-02  | 6.3E-01 | 8.0E-05        |
| 1.07           | rs2131925  | <i>ANGPTL3</i>       | 1   | 62798530        | -1.7E-02 | 5.0E-01 | 1.3E-04        | -1.6E-02  | 5.1E-01 | 1.2E-04        | -3.8E-02 | 1.3E-01 | 6.6E-04        | -3.3E-02 | 2.3E-01 | 4.9E-04        | 7.2E-03  | 8.0E-01 | 2.3E-05        |
| 1.08           | rs7515577  | <i>EVIS</i>          | 1   | 92782026        | 2.9E-02  | 3.2E-01 | 2.9E-04        | 1.7E-02   | 5.5E-01 | 1.0E-04        | 5.3E-03  | 8.6E-01 | 9.5E-06        | 4.4E-02  | 1.7E-01 | 6.4E-04        | -5.3E-02 | 9.7E-02 | 9.6E-04        |
| 1.09           | rs629301   | <i>SORT1</i>         | 1   | 109619829       | -3.2E-02 | 2.3E-01 | 4.3E-04        | -3.2E-02  | 2.2E-01 | 4.2E-04        | -1.7E-02 | 5.3E-01 | 1.1E-04        | -4.3E-02 | 1.4E-01 | 7.5E-04        | 5.3E-02  | 7.1E-02 | 1.1E-03        |
| 1.10           | rs267733   | <i>ANXA9-CERS2</i>   | 1   | 149225460       | -2.4E-02 | 4.6E-01 | 1.6E-04        | -3.8E-02  | 2.4E-01 | 4.0E-04        | 6.6E-03  | 8.4E-01 | 1.2E-05        | -6.0E-02 | 9.7E-02 | 9.6E-04        | -5.1E-02 | 1.6E-01 | 6.8E-04        |
| 1.11           | rs12145743 | <i>HMGF-PMVK</i>     | 1   | 154967275       | 2.6E-02  | 3.0E-01 | 3.1E-04        | 3.5E-02   | 1.6E-01 | 5.8E-04        | 9.2E-03  | 7.1E-01 | 3.9E-05        | 4.1E-02  | 1.4E-01 | 7.6E-04        | -4.3E-04 | 9.9E-01 | 8.4E-08        |
| 1.12           | rs4650994  | <i>ANGPTL1</i>       | 1   | 176781935       | 4.9E-02  | 4.1E-02 | 1.2E-03        | 3.9E-02   | 1.0E-01 | 7.6E-04        | 1.3E-02  | 6.0E-01 | 7.8E-05        | 3.2E-03  | 9.0E-01 | 5.2E-06        | 4.7E-02  | 7.8E-02 | 1.1E-03        |
| 1.13           | rs1689800  | <i>ZNF648</i>        | 1   | 180435508       | 1.1E-02  | 6.5E-01 | 6.0E-05        | -4.6E-06  | 1.0E+00 | 1.0E-11        | -3.3E-02 | 1.9E-01 | 5.0E-04        | 1.8E-02  | 5.1E-01 | 1.5E-04        | 2.1E-02  | 4.5E-01 | 2.0E-04        |
| 1.14           | rs2807834  | <i>MOSC1</i>         | 1   | 219037216       | 1.8E-02  | 4.9E-01 | 1.4E-04        | 1.3E-02   | 6.0E-01 | 8.1E-05        | 1.2E-02  | 6.3E-01 | 6.7E-05        | 1.6E-02  | 5.8E-01 | 1.1E-04        | 3.7E-02  | 1.8E-01 | 6.1E-04        |
| 1.15           | rs4846914  | <i>GALNT2</i>        | 1   | 228362314       | -3.6E-03 | 8.8E-01 | 6.2E-06        | 1.3E-02   | 5.9E-01 | 8.2E-05        | -7.3E-04 | 9.8E-01 | 2.5E-07        | 2.8E-02  | 2.9E-01 | 3.8E-04        | 2.2E-02  | 4.1E-01 | 2.4E-04        |
| 1.16           | rs514230   | <i>IRF2BP2</i>       | 1   | 232925220       | -3.0E-02 | 2.1E-01 | 4.5E-04        | -1.9E-02  | 4.2E-01 | 1.9E-04        | -1.9E-02 | 4.2E-01 | 1.9E-04        | -3.2E-02 | 2.2E-01 | 5.3E-04        | 1.2E-03  | 9.6E-01 | 7.2E-07        |
| 2.01           | rs1367117  | <i>APOB</i>          | 2   | 21117405        | 6.5E-02  | 1.1E-02 | 1.8E-03        | 4.8E-02   | 5.9E-02 | 1.0E-03        | 1.6E-02  | 5.4E-01 | 1.1E-04        | 6.5E-02  | 2.3E-02 | 1.8E-03        | -3.4E-02 | 2.3E-01 | 4.9E-04        |
| 2.02           | rs1260326  | <i>GCKR</i>          | 2   | 27584444        | -8.7E-03 | 7.2E-01 | 3.7E-05        | -3.9E-02  | 1.1E-01 | 7.4E-04        | 1.1E-02  | 6.4E-01 | 6.4E-05        | 2.2E-02  | 4.2E-01 | 2.3E-04        | -1.4E-02 | 6.0E-01 | 9.3E-05        |
| 2.03           | rs4299376  | <i>ABCG5-8</i>       | 2   | 43926080        | 2.6E-02  | 3.2E-01 | 2.9E-04        | 2.3E-02   | 3.7E-01 | 2.3E-04        | -1.4E-02 | 5.9E-01 | 8.4E-05        | 9.9E-03  | 7.3E-01 | 4.1E-05        | -5.8E-02 | 4.5E-02 | 1.4E-03        |
| 2.04           | rs2710642  | <i>EHBPI</i>         | 2   | 63003061        | 3.0E-03  | 9.1E-01 | 4.1E-06        | -1.8E-02  | 4.7E-01 | 1.5E-04        | -1.4E-02 | 5.6E-01 | 9.6E-05        | -3.1E-02 | 2.6E-01 | 4.4E-04        | -1.5E-02 | 5.9E-01 | 1.0E-04        |
| 2.05           | rs10490626 | <i>INSIG2</i>        | 2   | 118552311       | -4.5E-02 | 2.8E-01 | 3.4E-04        | -3.2E-02  | 4.4E-01 | 1.7E-04        | -2.7E-02 | 5.2E-01 | 1.2E-04        | -1.6E-02 | 7.3E-01 | 4.0E-05        | -2.2E-03 | 9.6E-01 | 7.6E-07        |
| 2.06           | rs2030746  | <i>LOC84931</i>      | 2   | 121025958       | 5.4E-02  | 2.6E-02 | 1.4E-03        | 3.5E-02   | 1.4E-01 | 6.2E-04        | 2.8E-02  | 2.6E-01 | 3.7E-04        | -6.5E-03 | 8.1E-01 | 2.0E-05        | -6.3E-02 | 1.9E-02 | 1.9E-03        |
| 2.07           | rs6759321  | <i>RABGAP1</i>       | 2   | 136039146       | 4.9E-02  | 6.0E-02 | 1.0E-03        | 3.8E-02   | 1.4E-01 | 6.2E-04        | 1.6E-02  | 5.5E-01 | 1.0E-04        | 7.2E-02  | 1.4E-02 | 2.1E-03        | 7.0E-03  | 8.1E-01 | 1.9E-05        |
| 2.08           | rs10195252 | <i>COBLL1</i>        | 2   | 165221337       | 1.2E-02  | 6.2E-01 | 7.0E-05        | 2.4E-02   | 3.2E-01 | 2.8E-04        | 2.8E-02  | 2.5E-01 | 3.8E-04        | 1.8E-04  | 9.9E-01 | 1.5E-08        | 5.7E-03  | 8.3E-01 | 1.6E-05        |
| 2.09           | rs2287623  | <i>ABCB11</i>        | 2   | 169538401       | 2.2E-02  | 3.7E-01 | 2.4E-04        | 7.3E-03   | 7.6E-01 | 2.6E-05        | 1.4E-03  | 9.6E-01 | 8.9E-07        | -8.9E-04 | 9.7E-01 | 3.7E-07        | 2.1E-02  | 4.3E-01 | 2.2E-04        |
| 2.10           | rs11694172 | <i>FAM117B</i>       | 2   | 203240549       | 3.4E-02  | 2.1E-01 | 4.5E-04        | 4.4E-02   | 1.0E-01 | 7.6E-04        | 1.0E-02  | 7.1E-01 | 4.0E-05        | 3.1E-02  | 3.0E-01 | 3.7E-04        | 2.5E-02  | 4.1E-01 | 2.4E-04        |
| 2.11           | rs1250229  | <i>FN1</i>           | 2   | 216012629       | -1.6E-02 | 5.6E-01 | 9.6E-05        | -1.7E-02  | 5.3E-01 | 1.1E-04        | -2.7E-02 | 3.3E-01 | 2.8E-04        | -3.4E-02 | 2.5E-01 | 4.6E-04        | -5.2E-03 | 8.6E-01 | 1.1E-05        |
| 2.12           | rs2943645  | <i>IRS1</i>          | 2   | 226807424       | -2.1E-02 | 3.9E-01 | 2.1E-04        | -2.4E-02  | 3.2E-01 | 2.9E-04        | -2.7E-02 | 2.7E-01 | 3.6E-04        | -2.4E-02 | 3.7E-01 | 2.8E-04        | 3.9E-02  | 1.5E-01 | 7.1E-04        |
| 2.13           | rs11563251 | <i>UGT1A1</i>        | 2   | 234344123       | -7.1E-02 | 7.1E-02 | 9.5E-04        | -6.1E-02  | 1.1E-01 | 7.1E-04        | -1.9E-02 | 6.3E-01 | 6.7E-05        | -5.3E-02 | 2.2E-01 | 5.3E-04        | -3.9E-02 | 3.7E-01 | 2.8E-04        |
| 3.01           | rs2606736  | <i>ATG7</i>          | 3   | 11375249        | 6.1E-03  | 8.0E-01 | 1.8E-05        | -5.6E-03  | 8.2E-01 | 1.5E-05        | 3.0E-03  | 9.0E-01 | 4.1E-06        | 2.3E-02  | 3.9E-01 | 2.5E-04        | -2.4E-02 | 3.7E-01 | 2.8E-04        |
| 3.02           | rs2290159  | <i>RAF1</i>          | 3   | 12603920        | -5.2E-03 | 8.5E-01 | 9.8E-06        | -3.1E-02  | 2.7E-01 | 3.4E-04        | -1.6E-02 | 5.8E-01 | 8.9E-05        | 1.5E-02  | 6.3E-01 | 8.2E-05        | 4.0E-02  | 2.0E-01 | 5.7E-04        |
| 3.03           | rs7640978  | <i>CMTM6</i>         | 3   | 32508014        | 5.0E-02  | 2.2E-01 | 4.3E-04        | 3.5E-02   | 3.9E-01 | 2.1E-04        | 2.6E-03  | 9.5E-01 | 1.1E-06        | -1.7E-02 | 7.0E-01 | 5.1E-05        | 5.0E-02  | 2.7E-01 | 4.2E-04        |
| 3.04           | rs2290547  | <i>SETD2</i>         | 3   | 47036187        | 1.5E-02  | 6.3E-01 | 6.6E-05        | 1.4E-02   | 6.6E-01 | 5.6E-05        | 2.2E-02  | 4.9E-01 | 1.4E-04        | 4.0E-02  | 2.4E-01 | 4.7E-04        | 3.4E-03  | 9.2E-01 | 3.5E-06        |
| 3.05           | rs2013208  | <i>RBM5</i>          | 3   | 50104403        | -3.0E-03 | 9.0E-01 | 4.7E-06        | 1.3E-02   | 5.8E-01 | 8.9E-05        | 1.2E-02  | 6.1E-01 | 7.3E-05        | -8.7E-03 | 7.3E-01 | 4.0E-05        | -2.6E-02 | 3.1E-01 | 3.6E-04        |
| 3.06           | rs13326165 | <i>STAB1</i>         | 3   | 52507158        | -2.9E-02 | 3.3E-01 | 2.8E-04        | -6.2E-02  | 3.6E-02 | 1.3E-03        | -6.0E-02 | 4.5E-02 | 1.2E-03        | -4.9E-02 | 1.4E-01 | 7.7E-04        | 1.1E-03  | 9.7E-01 | 4.2E-07        |
| 3.07           | rs13315871 | <i>PXK</i>           | 3   | 58356327        | -5.1E-02 | 2.1E-01 | 4.5E-04        | -9.4E-02  | 2.2E-02 | 1.5E-03        | -1.7E-02 | 6.8E-01 | 4.8E-05        | -1.5E-02 | 7.4E-01 | 3.7E-05        | 4.0E-02  | 3.8E-01 | 2.7E-04        |
| 3.08           | rs6805251  | <i>GSK3B</i>         | 3   | 121043296       | -9.8E-03 | 6.9E-01 | 4.7E-05        | -3.5E-02  | 1.5E-01 | 5.9E-04        | 2.2E-02  | 3.7E-01 | 2.3E-04        | 1.3E-02  | 6.4E-01 | 7.5E-05        | -3.6E-04 | 9.9E-01 | 6.0E-08        |
| 3.09           | rs17404153 | <i>ACAD11</i>        | 3   | 133645890       | -1.1E-02 | 7.6E-01 | 2.8E-05        | 1.1E-02   | 7.7E-01 | 2.6E-05        | -4.0E-02 | 2.7E-01 | 3.6E-04        | -2.7E-02 | 4.9E-01 | 1.6E-04        | 1.8E-02  | 6.5E-01 | 7.0E-05        |
| 3.10           | rs645040   | <i>MSL2L1</i>        | 3   | 137409312       | 1.0E-02  | 7.1E-01 | 3.9E-05        | 2.3E-02   | 4.1E-01 | 1.9E-04        | -9.6E-03 | 7.4E-01 | 3.2E-05        | 2.2E-02  | 4.8E-01 | 1.8E-04        | 4.2E-02  | 1.8E-01 | 6.2E-04        |
| 4.01           | rs6831256  | <i>LRPAP1</i>        | 4   | 3442937         | 1.8E-02  | 4.6E-01 | 1.6E-04        | 1.2E-02   | 6.0E-01 | 7.7E-05        | -4.5E-03 | 8.5E-01 | 9.9E-06        | 1.7E-02  | 5.2E-01 | 1.4E-04        | 6.4E-02  | 1.7E-02 | 2.0E-03        |
| 4.02           | rs10019888 | <i>C4orf52</i>       | 4   | 25672088        | 1.0E-02  | 7.4E-01 | 3.1E-05        | 2.9E-02   | 3.5E-01 | 2.5E-04        | 4.2E-02  | 1.8E-01 | 5.1E-04        | -2.9E-02 | 4.0E-01 | 2.5E-04        | 4.1E-02  | 2.4E-01 | 4.8E-04        |
| 4.03           | rs442177   | <i>KLHL8</i>         | 4   | 88249285        | 1.3E-02  | 5.8E-01 | 8.8E-05        | -9.0E-03  | 7.1E-01 | 4.0E-05        | -1.5E-02 | 5.5E-01 | 1.0E-04        | 1.2E-02  | 6.5E-01 | 6.9E-05        | 4.8E-02  | 7.7E-02 | 1.1E-03        |
| 4.04           | rs2199936  | <i>ABCG2 - delta</i> | 4   | 89264355        | 5.2E-02  | 1.7E-01 | 5.5E-04        | 4.5E-02   | 2.3E-01 | 4.1E-04        | 1.0E-02  | 7.8E-01 | 2.2E-05        | -3.0E-02 | 4.8E-01 | 1.7E-04        | -1.7E-02 | 6.9E-01 | 5.7E-05        |





| Cluster number | rsID       | Locus Name          | Chr | Position (hg18) | LDL-C    |         |                | non-HDL-C |         |                | apo B    |         |                | LDL-P    |         |                | LDL-size |         |                |
|----------------|------------|---------------------|-----|-----------------|----------|---------|----------------|-----------|---------|----------------|----------|---------|----------------|----------|---------|----------------|----------|---------|----------------|
|                |            |                     |     |                 | Beta (q) | P-value | R <sup>2</sup> | Beta (q)  | P-value | R <sup>2</sup> | Beta (q) | P-value | R <sup>2</sup> | Beta (q) | P-value | R <sup>2</sup> | Beta (q) | P-value | R <sup>2</sup> |
| 19.04          | rs6511720  | <i>LDLR</i>         | 19  | 11063306        | -1.7E-02 | 6.0E-01 | 7.9E-05        | -6.1E-02  | 6.7E-02 | 9.6E-04        | 2.1E-02  | 5.4E-01 | 1.1E-04        | 4.5E-02  | 2.2E-01 | 5.1E-04        | -4.9E-02 | 1.8E-01 | 6.3E-04        |
| 19.05          | rs737337   | <i>LOC55908</i>     | 19  | 11208493        | 3.4E-02  | 4.5E-01 | 1.7E-04        | 2.9E-03   | 9.5E-01 | 1.2E-06        | -3.2E-02 | 4.8E-01 | 1.4E-04        | 6.0E-03  | 9.1E-01 | 4.9E-06        | 9.1E-02  | 6.9E-02 | 1.2E-03        |
| 19.06          | rs10401969 | <i>CILP2</i>        | 19  | 19268718        | -1.1E-02 | 8.0E-01 | 1.9E-05        | 2.8E-02   | 5.1E-01 | 1.3E-04        | 2.8E-02  | 5.1E-01 | 1.2E-04        | 4.7E-02  | 3.1E-01 | 3.6E-04        | -5.3E-02 | 2.6E-01 | 4.5E-04        |
| 19.07          | rs731839   | <i>PEPD</i>         | 19  | 38590905        | 1.1E-02  | 6.5E-01 | 5.9E-05        | -1.0E-03  | 9.7E-01 | 4.8E-07        | -4.7E-03 | 8.5E-01 | 9.9E-06        | -1.7E-02 | 5.4E-01 | 1.3E-04        | -2.3E-02 | 4.0E-01 | 2.4E-04        |
| 19.08          | rs7412     | <i>APOE - delta</i> | 19  | 50103919        | -8.4E-02 | 1.9E-02 | 1.6E-03        | -1.2E-01  | 5.5E-04 | 3.4E-03        | 1.4E-02  | 6.9E-01 | 4.5E-05        | 3.4E-02  | 3.9E-01 | 2.6E-04        | 4.3E-02  | 2.8E-01 | 4.0E-04        |
| 19.09          | rs4420638  | <i>APOEC1C2</i>     | 19  | 50114786        | 3.2E-02  | 3.7E-01 | 2.4E-04        | 4.9E-02   | 1.7E-01 | 5.4E-04        | -1.0E-02 | 7.8E-01 | 2.3E-05        | -5.5E-02 | 1.7E-01 | 6.7E-04        | 1.1E-01  | 7.8E-03 | 2.5E-03        |
| 19.10          | rs492602   | <i>FLJ36070</i>     | 19  | 53898229        | -2.9E-02 | 2.3E-01 | 4.2E-04        | -4.9E-02  | 4.0E-02 | 1.2E-03        | -5.3E-03 | 8.3E-01 | 1.4E-05        | -3.8E-03 | 8.8E-01 | 7.3E-06        | 7.8E-03  | 7.7E-01 | 3.0E-05        |
| 19.11          | rs17695224 | <i>HAS1</i>         | 19  | 57016028        | 1.8E-02  | 4.9E-01 | 1.4E-04        | -1.4E-03  | 9.6E-01 | 8.0E-07        | -1.7E-02 | 5.2E-01 | 1.2E-04        | 6.2E-03  | 8.3E-01 | 1.5E-05        | -4.7E-02 | 1.1E-01 | 9.0E-04        |
| 19.12          | rs386000   | <i>LILRA3</i>       | 19  | 59484573        | 1.6E-02  | 5.7E-01 | 9.2E-05        | -5.2E-03  | 8.6E-01 | 9.5E-06        | 3.5E-02  | 2.3E-01 | 4.2E-04        | 6.8E-02  | 3.3E-02 | 1.6E-03        | -1.6E-02 | 6.1E-01 | 8.9E-05        |
| 20.01          | rs364585   | <i>SPTLC3</i>       | 20  | 12910718        | -4.1E-02 | 9.0E-02 | 8.3E-04        | -4.7E-02  | 4.8E-02 | 1.1E-03        | -1.2E-02 | 6.2E-01 | 7.0E-05        | -2.1E-02 | 4.2E-01 | 2.2E-04        | 2.3E-04  | 9.9E-01 | 2.5E-08        |
| 20.02          | rs2328223  | <i>SNX5</i>         | 20  | 17793921        | -1.1E-02 | 7.1E-01 | 3.9E-05        | -9.4E-03  | 7.6E-01 | 2.7E-05        | -3.0E-02 | 3.4E-01 | 2.7E-04        | -1.8E-02 | 5.9E-01 | 1.0E-04        | 2.5E-02  | 4.6E-01 | 1.9E-04        |
| 20.03          | rs2277862  | <i>ERGIC3</i>       | 20  | 33616196        | 1.1E-02  | 7.5E-01 | 2.9E-05        | -4.1E-03  | 9.0E-01 | 4.4E-06        | 1.8E-02  | 5.9E-01 | 8.4E-05        | 4.1E-02  | 2.8E-01 | 4.0E-04        | -2.4E-03 | 9.5E-01 | 1.3E-06        |
| 20.04          | rs2902940  | <i>MAFB</i>         | 20  | 38524901        | -6.3E-02 | 1.6E-02 | 1.7E-03        | -4.0E-02  | 1.3E-01 | 6.6E-04        | -3.3E-02 | 2.2E-01 | 4.3E-04        | -1.1E-02 | 7.0E-01 | 5.3E-05        | -6.1E-02 | 3.7E-02 | 1.5E-03        |
| 20.05          | rs909802   | <i>TOP1</i>         | 20  | 39370229        | 4.3E-02  | 7.9E-02 | 9.0E-04        | 4.5E-02   | 6.2E-02 | 1.0E-03        | 2.7E-02  | 2.7E-01 | 3.5E-04        | 1.5E-02  | 5.7E-01 | 1.1E-04        | 1.7E-02  | 5.2E-01 | 1.4E-04        |
| 20.06          | rs1800961  | <i>HNF4A</i>        | 20  | 42475778        | 5.0E-02  | 4.8E-01 | 1.4E-04        | -2.5E-03  | 9.7E-01 | 3.5E-07        | 4.6E-02  | 5.2E-01 | 1.2E-04        | 8.0E-02  | 3.1E-01 | 3.6E-04        | 5.2E-02  | 5.1E-01 | 1.5E-04        |
| 20.07          | rs6065906  | <i>PLTP</i>         | 20  | 43987422        | 2.4E-02  | 4.3E-01 | 1.8E-04        | 1.1E-02   | 7.1E-01 | 3.9E-05        | 2.9E-02  | 3.5E-01 | 2.6E-04        | -1.2E-02 | 7.3E-01 | 4.1E-05        | -6.0E-03 | 8.6E-01 | 1.1E-05        |
| 22.01          | rs181362   | <i>UBE2L3</i>       | 22  | 20262068        | 1.5E-02  | 6.2E-01 | 7.1E-05        | 1.6E-02   | 5.8E-01 | 8.9E-05        | -8.0E-03 | 7.9E-01 | 2.1E-05        | -3.5E-02 | 2.9E-01 | 3.9E-04        | 2.9E-02  | 3.7E-01 | 2.8E-04        |
| 22.02          | rs5763662  | <i>MTMR3</i>        | 22  | 28708703        | -1.5E-01 | 5.6E-02 | 1.1E-03        | -1.1E-01  | 1.5E-01 | 5.9E-04        | -1.4E-01 | 7.2E-02 | 9.4E-04        | -3.5E-02 | 6.9E-01 | 5.6E-05        | -4.4E-02 | 6.2E-01 | 8.6E-05        |
| 22.03          | rs138777   | <i>TOM1</i>         | 22  | 34041098        | -2.8E-02 | 2.7E-01 | 3.6E-04        | -3.0E-02  | 2.3E-01 | 4.2E-04        | -5.7E-02 | 2.5E-02 | 1.4E-03        | -3.9E-02 | 1.7E-01 | 6.6E-04        | -1.6E-02 | 5.7E-01 | 1.1E-04        |
| 22.04          | rs5756931  | <i>PLA2G6</i>       | 22  | 36875979        | 1.4E-02  | 5.7E-01 | 9.1E-05        | 3.1E-02   | 1.9E-01 | 4.8E-04        | 4.7E-02  | 5.5E-02 | 1.1E-03        | 2.3E-02  | 4.0E-01 | 2.4E-04        | -4.2E-02 | 1.2E-01 | 8.4E-04        |
| 22.05          | rs4253772  | <i>PPARA</i>        | 22  | 45006267        | 9.4E-02  | 1.3E-02 | 1.8E-03        | 5.7E-02   | 1.3E-01 | 6.6E-04        | 4.8E-02  | 2.1E-01 | 4.5E-04        | -1.5E-02 | 7.1E-01 | 4.8E-05        | 4.5E-02  | 2.8E-01 | 4.1E-04        |

Cluster number: unique numeric identifier for each of the SNPs in the analysis

rsID: SNP name

Chr: chromosome

Beta (q): Beta-coefficient from inverse-quantile transformed data

R<sup>2</sup>: variance explained by SNP









| Cluster number | rsID       | Locus Name          | Chr | Position (hg18) | LDL-C    |         |                | non-HDL-C |         |                | apo B    |         |                | LDL-P    |         |                | LDL-size |         |                |
|----------------|------------|---------------------|-----|-----------------|----------|---------|----------------|-----------|---------|----------------|----------|---------|----------------|----------|---------|----------------|----------|---------|----------------|
|                |            |                     |     |                 | Beta (q) | P-value | R <sup>2</sup> | Beta (q)  | P-value | R <sup>2</sup> | Beta (q) | P-value | R <sup>2</sup> | Beta (q) | P-value | R <sup>2</sup> | Beta (q) | P-value | R <sup>2</sup> |
| 19.05          | rs737337   | <i>LOC55908</i>     | 19  | 11208493        | 3.7E-02  | 4.1E-01 | 1.9E-04        | 2.1E-03   | 9.6E-01 | 6.5E-07        | -2.8E-02 | 5.4E-01 | 1.1E-04        | -2.9E-03 | 9.5E-01 | 1.2E-06        | 8.9E-02  | 7.7E-02 | 1.1E-03        |
| 19.06          | rs10401969 | <i>CILP2</i>        | 19  | 19268718        | -1.0E-02 | 8.1E-01 | 1.8E-05        | 2.3E-02   | 5.8E-01 | 8.7E-05        | 2.2E-02  | 6.0E-01 | 7.8E-05        | 4.0E-02  | 3.8E-01 | 2.6E-04        | -5.2E-02 | 2.6E-01 | 4.4E-04        |
| 19.07          | rs731839   | <i>PEPD</i>         | 19  | 38590905        | 1.3E-02  | 6.1E-01 | 7.7E-05        | -4.5E-04  | 9.9E-01 | 9.5E-08        | -1.8E-03 | 9.4E-01 | 1.5E-06        | -2.4E-02 | 4.0E-01 | 2.5E-04        | -2.6E-02 | 3.6E-01 | 2.9E-04        |
| 19.08          | rs7412     | <i>APOE - delta</i> | 19  | 50103919        | -6.4E-02 | 7.6E-02 | 9.1E-04        | -1.2E-01  | 1.0E-03 | 3.1E-03        | -5.2E-03 | 8.9E-01 | 5.8E-06        | -3.5E-03 | 9.3E-01 | 2.8E-06        | 3.4E-02  | 4.0E-01 | 2.4E-04        |
| 19.09          | rs4420638  | <i>APOEC1C2</i>     | 19  | 50114786        | 2.6E-02  | 4.8E-01 | 1.5E-04        | 4.9E-02   | 1.7E-01 | 5.4E-04        | -7.9E-03 | 8.3E-01 | 1.4E-05        | -4.9E-02 | 2.2E-01 | 5.1E-04        | 1.1E-01  | 7.2E-03 | 2.5E-03        |
| 19.10          | rs492602   | <i>FLJ36070</i>     | 19  | 53898229        | -3.2E-02 | 1.8E-01 | 5.2E-04        | -4.9E-02  | 4.0E-02 | 1.2E-03        | -8.5E-03 | 7.3E-01 | 3.5E-05        | -4.9E-03 | 8.5E-01 | 1.2E-05        | 7.9E-03  | 7.7E-01 | 3.1E-05        |
| 19.11          | rs17695224 | <i>HAS1</i>         | 19  | 57016028        | 1.2E-02  | 6.5E-01 | 6.1E-05        | -2.5E-03  | 9.3E-01 | 2.5E-06        | -1.8E-02 | 4.9E-01 | 1.4E-04        | 2.5E-03  | 9.3E-01 | 2.4E-06        | -4.4E-02 | 1.4E-01 | 7.7E-04        |
| 19.12          | rs386000   | <i>LILRA3</i>       | 19  | 59484573        | 1.8E-02  | 5.4E-01 | 1.1E-04        | -5.1E-03  | 8.6E-01 | 8.9E-06        | 3.6E-02  | 2.1E-01 | 4.5E-04        | 6.0E-02  | 6.0E-02 | 1.2E-03        | -1.7E-02 | 5.9E-01 | 1.0E-04        |
| 20.01          | rs364585   | <i>SPTLC3</i>       | 20  | 12910718        | -4.0E-02 | 1.0E-01 | 7.8E-04        | -4.7E-02  | 4.9E-02 | 1.1E-03        | -1.1E-02 | 6.4E-01 | 6.2E-05        | -2.0E-02 | 4.6E-01 | 1.9E-04        | 2.2E-03  | 9.3E-01 | 2.4E-06        |
| 20.02          | rs2328223  | <i>SNX5</i>         | 20  | 17793921        | -1.1E-02 | 7.2E-01 | 3.6E-05        | -7.0E-03  | 8.2E-01 | 1.5E-05        | -2.6E-02 | 3.9E-01 | 2.1E-04        | -1.4E-02 | 6.7E-01 | 6.1E-05        | 2.4E-02  | 4.9E-01 | 1.7E-04        |
| 20.03          | rs2277862  | <i>ERGIC3</i>       | 20  | 33616196        | 6.6E-03  | 8.5E-01 | 1.1E-05        | -4.6E-03  | 8.9E-01 | 5.3E-06        | 1.4E-02  | 6.8E-01 | 5.0E-05        | 3.7E-02  | 3.3E-01 | 3.3E-04        | -3.8E-03 | 9.2E-01 | 3.5E-06        |
| 20.04          | rs2902940  | <i>MAFB</i>         | 20  | 38524901        | -5.2E-02 | 4.9E-02 | 1.1E-03        | -3.0E-02  | 2.5E-01 | 3.8E-04        | -2.7E-02 | 3.2E-01 | 2.9E-04        | -1.4E-02 | 6.2E-01 | 8.5E-05        | -6.1E-02 | 3.5E-02 | 1.5E-03        |
| 20.05          | rs909802   | <i>TOP1</i>         | 20  | 39370229        | 4.1E-02  | 8.9E-02 | 8.4E-04        | 4.3E-02   | 7.7E-02 | 9.0E-04        | 2.6E-02  | 2.9E-01 | 3.2E-04        | 1.5E-02  | 5.9E-01 | 1.0E-04        | 1.5E-02  | 5.8E-01 | 1.0E-04        |
| 20.06          | rs1800961  | <i>HNF4A</i>        | 20  | 42475778        | 6.6E-02  | 3.5E-01 | 2.5E-04        | 1.8E-02   | 8.0E-01 | 1.8E-05        | 6.1E-02  | 4.0E-01 | 2.1E-04        | 1.0E-01  | 2.0E-01 | 5.8E-04        | 4.6E-02  | 5.6E-01 | 1.2E-04        |
| 20.07          | rs6065906  | <i>PLTP</i>         | 20  | 43987422        | 2.4E-02  | 4.2E-01 | 1.8E-04        | 6.9E-03   | 8.2E-01 | 1.5E-05        | 2.7E-02  | 3.9E-01 | 2.2E-04        | -1.6E-02 | 6.3E-01 | 8.1E-05        | -9.2E-03 | 7.9E-01 | 2.5E-05        |
| 22.01          | rs181362   | <i>UBE2L3</i>       | 22  | 20262068        | 1.4E-02  | 6.5E-01 | 6.1E-05        | 1.8E-02   | 5.3E-01 | 1.1E-04        | -9.9E-03 | 7.4E-01 | 3.2E-05        | -3.6E-02 | 2.7E-01 | 4.1E-04        | 2.9E-02  | 3.8E-01 | 2.7E-04        |
| 22.02          | rs5763662  | <i>MTMR3</i>        | 22  | 28708703        | -1.6E-01 | 4.0E-02 | 1.2E-03        | -1.3E-01  | 9.9E-02 | 7.8E-04        | -1.4E-01 | 7.1E-02 | 9.4E-04        | -3.8E-02 | 6.7E-01 | 6.3E-05        | -5.4E-02 | 5.4E-01 | 1.3E-04        |
| 22.03          | rs138777   | <i>TOM1</i>         | 22  | 34041098        | -2.9E-02 | 2.6E-01 | 3.7E-04        | -3.3E-02  | 2.0E-01 | 4.8E-04        | -5.5E-02 | 3.3E-02 | 1.3E-03        | -3.3E-02 | 2.4E-01 | 4.7E-04        | -1.7E-02 | 5.5E-01 | 1.3E-04        |
| 22.04          | rs5756931  | <i>PLA2G6</i>       | 22  | 36875979        | 1.8E-02  | 4.6E-01 | 1.6E-04        | 3.4E-02   | 1.6E-01 | 5.5E-04        | 4.7E-02  | 5.4E-02 | 1.1E-03        | 2.6E-02  | 3.5E-01 | 3.1E-04        | -4.0E-02 | 1.4E-01 | 7.7E-04        |
| 22.05          | rs4253772  | <i>PPARA</i>        | 22  | 45006267        | 1.0E-01  | 8.1E-03 | 2.0E+00        | 5.8E-02   | 1.2E-01 | 6.8E-04        | 4.8E-02  | 2.1E-01 | 4.6E-04        | -2.4E-02 | 5.7E-01 | 1.1E-04        | 4.4E-02  | 2.8E-01 | 4.0E-04        |

Cluster number: unique numeric identifier for each of the SNPs in the analysis

rsID: SNP name

Chr: chromosome

Beta (q): Beta-coefficient from inverse-quantile transformed data

R<sup>2</sup>: variance explained by SNP

**Supplemental Table 6e:** P-values for interaction (pinteraction) between index variant and statin-allocation each candidate region tested association with absolute and percentage change in LDL-C, non-HDL-C, apo B, LDL-P and LDL-size.

| Cluster number | rsID       | Locus Name    | Chr | Position (hg18) | Absolute Change (p <sub>interaction</sub> ) |           |         |         |          | Percentage Change (p <sub>interaction</sub> ) |           |         |         |          |
|----------------|------------|---------------|-----|-----------------|---------------------------------------------|-----------|---------|---------|----------|-----------------------------------------------|-----------|---------|---------|----------|
|                |            |               |     |                 | LDL-C                                       | non-HDL-C | apo B   | LDL-P   | LDL-size | LDL-C                                         | non-HDL-C | apo B   | LDL-P   | LDL-size |
| 1.01           | rs1077514  | ASAP3         | 1   | 23638820        | 1.9E-01                                     | 2.5E-01   | 4.7E-01 | 8.3E-01 | 6.3E-01  | 3.4E-01                                       | 4.0E-01   | 6.5E-01 | 9.2E-01 | 6.3E-01  |
| 1.02           | rs12027135 | LDLRAP1       | 1   | 25648320        | 4.2E-01                                     | 3.9E-01   | 8.4E-01 | 3.4E-01 | 8.1E-01  | 8.7E-01                                       | 5.8E-01   | 8.2E-01 | 3.4E-01 | 7.9E-01  |
| 1.03           | rs12748152 | PIGV-NR0B2    | 1   | 27010980        | 1.2E-01                                     | 1.2E-01   | 5.7E-01 | 9.4E-01 | 7.0E-01  | 3.8E-01                                       | 1.6E-01   | 5.3E-01 | 6.3E-01 | 7.2E-01  |
| 1.04           | rs4660293  | PABPC4        | 1   | 39800767        | 5.3E-01                                     | 3.7E-01   | 4.3E-01 | 2.6E-01 | 2.0E-01  | 4.3E-01                                       | 2.2E-01   | 4.7E-01 | 2.6E-01 | 2.0E-01  |
| 1.05           | rs2479409  | PCSK9         | 1   | 55277238        | 9.2E-01                                     | 6.4E-01   | 7.6E-01 | 3.3E-01 | 6.5E-01  | 8.4E-01                                       | 3.0E-01   | 9.4E-01 | 2.5E-01 | 6.6E-01  |
| 1.06           | rs17111584 | PCSK9 - delta | 1   | 55319284        | 3.0E-02                                     | 3.4E-02   | 1.2E-01 | 9.2E-01 | 7.0E-01  | 8.0E-01                                       | 2.3E-01   | 3.2E-01 | 9.9E-01 | 6.8E-01  |
| 1.07           | rs2131925  | ANGPTL3       | 1   | 62798530        | 5.3E-01                                     | 3.2E-01   | 3.4E-02 | 3.7E-02 | 7.3E-02  | 9.8E-01                                       | 7.8E-01   | 3.8E-01 | 2.1E-01 | 7.4E-02  |
| 1.08           | rs7515577  | EVI5          | 1   | 92782026        | 1.2E-01                                     | 9.2E-02   | 8.5E-02 | 3.0E-03 | 3.4E-01  | 6.5E-02                                       | 3.8E-02   | 5.3E-02 | 4.1E-03 | 3.0E-01  |
| 1.09           | rs629301   | SORT1         | 1   | 109619829       | 9.9E-01                                     | 3.7E-01   | 6.8E-01 | 5.4E-01 | 5.6E-01  | 6.0E-01                                       | 6.0E-01   | 2.9E-01 | 8.7E-01 | 5.6E-01  |
| 1.10           | rs267733   | ANXA9-CERS2   | 1   | 149225460       | 8.1E-01                                     | 4.3E-01   | 8.9E-01 | 4.4E-01 | 7.9E-01  | 4.7E-01                                       | 3.2E-01   | 8.2E-01 | 7.8E-02 | 7.9E-01  |
| 1.11           | rs12145743 | HDGF-PMVK     | 1   | 154967275       | 3.0E-01                                     | 2.4E-01   | 7.2E-01 | 7.3E-01 | 5.1E-01  | 7.1E-01                                       | 4.0E-01   | 7.3E-01 | 7.1E-01 | 5.2E-01  |
| 1.12           | rs4650994  | ANGPTL1       | 1   | 176781935       | 3.2E-01                                     | 2.7E-01   | 5.6E-01 | 7.4E-01 | 8.2E-01  | 9.3E-02                                       | 1.7E-01   | 5.9E-01 | 5.4E-01 | 8.0E-01  |
| 1.13           | rs1689800  | ZNF648        | 1   | 180435508       | 9.1E-01                                     | 7.7E-01   | 1.2E-01 | 5.7E-01 | 3.8E-01  | 3.7E-01                                       | 3.7E-01   | 6.7E-02 | 6.8E-01 | 3.9E-01  |
| 1.14           | rs2807834  | MOSC1         | 1   | 219037216       | 5.3E-01                                     | 2.9E-01   | 9.1E-02 | 4.3E-01 | 6.7E-01  | 2.8E-01                                       | 4.4E-01   | 1.7E-01 | 5.8E-01 | 6.6E-01  |
| 1.15           | rs4846914  | GALNT2        | 1   | 228362314       | 7.7E-01                                     | 5.4E-01   | 8.9E-01 | 3.2E-01 | 2.0E-01  | 7.2E-01                                       | 9.4E-01   | 6.1E-01 | 9.1E-01 | 2.3E-01  |
| 1.16           | rs514230   | IRF2BP2       | 1   | 232925220       | 5.7E-01                                     | 5.3E-01   | 4.3E-01 | 1.6E-01 | 1.3E-01  | 8.2E-01                                       | 8.1E-01   | 7.1E-01 | 2.3E-01 | 1.2E-01  |
| 2.01           | rs1367117  | APOB          | 2   | 21117405        | 6.3E-03                                     | 3.1E-02   | 2.6E-01 | 3.8E-01 | 4.0E-01  | 3.2E-02                                       | 3.3E-02   | 2.7E-01 | 5.7E-02 | 4.0E-01  |
| 2.02           | rs1260326  | GCKR          | 2   | 27584444        | 4.6E-01                                     | 6.8E-01   | 3.4E-01 | 1.7E-02 | 1.1E-01  | 5.2E-01                                       | 6.6E-02   | 8.0E-01 | 1.1E-01 | 1.2E-01  |
| 2.03           | rs4299376  | ABCG5-8       | 2   | 43926080        | 7.4E-01                                     | 7.4E-01   | 9.3E-01 | 5.5E-01 | 1.7E-01  | 6.2E-01                                       | 3.6E-01   | 8.4E-01 | 3.3E-01 | 1.6E-01  |
| 2.04           | rs2710642  | EHBP1         | 2   | 63003061        | 3.2E-01                                     | 5.0E-01   | 4.6E-01 | 8.0E-01 | 8.6E-01  | 2.0E-01                                       | 3.9E-01   | 3.8E-01 | 6.8E-01 | 8.6E-01  |
| 2.05           | rs10490626 | INSIG2        | 2   | 118552311       | 4.5E-01                                     | 6.7E-01   | 7.0E-01 | 9.4E-01 | 2.8E-01  | 9.6E-01                                       | 5.4E-01   | 6.3E-01 | 9.8E-01 | 2.7E-01  |
| 2.06           | rs2030746  | LOC84931      | 2   | 121025958       | 1.2E-01                                     | 6.2E-02   | 4.7E-01 | 7.4E-01 | 2.3E-01  | 2.6E-01                                       | 2.3E-01   | 6.7E-01 | 9.9E-01 | 2.4E-01  |
| 2.07           | rs6759321  | RABGAP1       | 2   | 136039146       | 1.4E-01                                     | 2.2E-01   | 1.3E-01 | 3.9E-03 | 6.1E-02  | 1.7E-01                                       | 5.4E-02   | 1.5E-02 | 7.7E-02 | 6.5E-02  |
| 2.08           | rs10195252 | COBLL1        | 2   | 165221337       | 7.4E-01                                     | 5.0E-01   | 1.5E-02 | 2.2E-01 | 8.0E-01  | 9.0E-01                                       | 3.6E-01   | 2.7E-02 | 3.3E-01 | 7.9E-01  |
| 2.09           | rs2287623  | ABCB11        | 2   | 169538401       | 4.7E-01                                     | 4.5E-01   | 9.6E-01 | 3.5E-01 | 6.5E-01  | 5.2E-01                                       | 4.6E-01   | 7.0E-01 | 5.9E-01 | 6.4E-01  |
| 2.10           | rs11694172 | FAM117B       | 2   | 203240549       | 8.7E-01                                     | 5.0E-01   | 4.7E-01 | 4.8E-01 | 1.7E-02  | 9.9E-01                                       | 6.0E-01   | 1.7E-01 | 9.4E-01 | 1.8E-02  |
| 2.11           | rs1250229  | FNI           | 2   | 216012629       | 8.2E-01                                     | 7.3E-01   | 8.2E-01 | 2.7E-01 | 6.4E-01  | 4.6E-01                                       | 9.6E-01   | 6.8E-01 | 3.1E-01 | 6.0E-01  |
| 2.12           | rs2943645  | IRS1          | 2   | 226807424       | 3.8E-01                                     | 8.7E-01   | 8.0E-01 | 4.5E-01 | 5.8E-01  | 2.2E-01                                       | 9.4E-01   | 6.9E-01 | 4.4E-01 | 5.9E-01  |
| 2.13           | rs11563251 | UGT1A1        | 2   | 234344123       | 3.7E-01                                     | 4.2E-01   | 2.1E-01 | 4.1E-02 | 1.9E-01  | 4.6E-01                                       | 6.4E-01   | 5.4E-01 | 1.5E-01 | 2.1E-01  |
| 3.01           | rs2606736  | ATG7          | 3   | 11375249        | 9.7E-01                                     | 5.9E-01   | 9.8E-01 | 3.5E-01 | 7.3E-01  | 5.0E-01                                       | 7.4E-01   | 9.3E-01 | 3.1E-01 | 7.3E-01  |
| 3.02           | rs2290159  | RAF1          | 3   | 12603920        | 3.8E-01                                     | 9.7E-01   | 8.4E-01 | 2.0E-01 | 3.6E-01  | 4.9E-01                                       | 8.9E-01   | 6.6E-01 | 2.9E-01 | 3.8E-01  |
| 3.03           | rs7640978  | CMTM6         | 3   | 32508014        | 1.8E-01                                     | 5.5E-02   | 3.2E-01 | 8.2E-01 | 7.8E-01  | 3.0E-01                                       | 6.2E-02   | 3.9E-01 | 9.5E-01 | 7.9E-01  |
| 3.04           | rs2290547  | SETD2         | 3   | 47036187        | 9.5E-01                                     | 8.1E-01   | 2.8E-01 | 1.9E-01 | 6.3E-01  | 4.5E-01                                       | 6.3E-01   | 2.4E-01 | 1.4E-01 | 6.0E-01  |
| 3.05           | rs2013208  | RBM5          | 3   | 50104403        | 9.5E-01                                     | 9.3E-01   | 4.2E-01 | 6.3E-01 | 6.7E-01  | 2.9E-01                                       | 6.3E-01   | 3.8E-01 | 7.6E-01 | 6.5E-01  |
| 3.06           | rs13326165 | STAB1         | 3   | 52507158        | 7.8E-01                                     | 1.5E-01   | 2.9E-02 | 8.6E-02 | 2.1E-01  | 9.2E-01                                       | 2.4E-01   | 5.0E-02 | 1.2E-01 | 2.2E-01  |
| 3.07           | rs13315871 | PXX           | 3   | 58356327        | 3.1E-01                                     | 7.5E-01   | 3.5E-01 | 6.5E-01 | 7.2E-01  | 1.9E-01                                       | 8.1E-01   | 2.9E-01 | 3.1E-01 | 7.6E-01  |
| 3.08           | rs6805251  | GSK3B         | 3   | 121043296       | 6.9E-01                                     | 4.6E-01   | 2.7E-02 | 5.2E-02 | 9.6E-02  | 8.2E-01                                       | 8.7E-01   | 1.2E-01 | 2.0E-01 | 9.9E-02  |
| 3.09           | rs17404153 | ACAD11        | 3   | 133645890       | 2.1E-01                                     | 4.9E-01   | 1.8E-01 | 5.7E-02 | 2.7E-01  | 2.1E-01                                       | 6.3E-01   | 1.1E-01 | 1.9E-01 | 2.6E-01  |
| 3.10           | rs645040   | MSL2L1        | 3   | 137409312       | 4.8E-01                                     | 9.4E-01   | 8.3E-01 | 2.2E-01 | 9.1E-01  | 7.6E-01                                       | 5.9E-01   | 9.3E-01 | 1.6E-01 | 9.2E-01  |
| 4.01           | rs6831256  | LRPAP1        | 4   | 3442937         | 3.8E-01                                     | 2.6E-01   | 9.3E-01 | 7.7E-01 | 9.6E-01  | 4.7E-01                                       | 8.2E-01   | 8.8E-01 | 8.7E-01 | 9.4E-01  |

| Cluster number | rsID       | Locus Name           | Chr | Position (hg18) | Absolute Change ( $p_{\text{interaction}}$ ) |           |         |         |          | Percentage Change ( $p_{\text{interaction}}$ ) |           |         |         |          |
|----------------|------------|----------------------|-----|-----------------|----------------------------------------------|-----------|---------|---------|----------|------------------------------------------------|-----------|---------|---------|----------|
|                |            |                      |     |                 | LDL-C                                        | non-HDL-C | apo B   | LDL-P   | LDL-size | LDL-C                                          | non-HDL-C | apo B   | LDL-P   | LDL-size |
| 4.02           | rs10019888 | <i>C4orf52</i>       | 4   | 25672088        | 5.0E-01                                      | 3.6E-01   | 1.9E-01 | 3.4E-01 | 9.5E-01  | 1.7E-01                                        | 2.7E-01   | 3.0E-01 | 4.7E-01 | 9.5E-01  |
| 4.03           | rs442177   | <i>KLHL8</i>         | 4   | 88249285        | 6.2E-01                                      | 9.4E-01   | 8.6E-01 | 5.7E-01 | 2.3E-01  | 9.2E-01                                        | 7.1E-01   | 7.6E-01 | 9.1E-01 | 2.3E-01  |
| 4.04           | rs2199936  | <i>ABCG2 - delta</i> | 4   | 89264355        | 8.0E-08                                      | 5.4E-09   | 2.5E-07 | 1.1E-02 | 1.8E-01  | 6.9E-07                                        | 3.1E-08   | 2.5E-06 | 4.7E-02 | 1.7E-01  |
| 4.05           | rs3822072  | <i>FAM13A1</i>       | 4   | 89960292        | 9.1E-02                                      | 2.1E-01   | 7.0E-01 | 6.6E-01 | 1.1E-01  | 1.2E-01                                        | 1.1E-01   | 2.2E-01 | 6.6E-01 | 1.2E-01  |
| 4.06           | rs2602836  | <i>ADH5</i>          | 4   | 100233828       | 2.5E-01                                      | 3.2E-02   | 1.1E-01 | 1.8E-02 | 6.3E-01  | 2.2E-01                                        | 1.0E-01   | 1.5E-01 | 2.0E-02 | 6.3E-01  |
| 4.07           | rs13107325 | <i>SLC39A8</i>       | 4   | 103407732       | 4.3E-01                                      | 5.0E-01   | 7.3E-01 | 4.7E-01 | 5.5E-01  | 1.8E-01                                        | 6.5E-01   | 7.3E-01 | 5.3E-01 | 5.2E-01  |
| 5.01           | rs6450176  | <i>ARL15</i>         | 5   | 53333782        | 7.7E-01                                      | 8.6E-01   | 3.3E-01 | 1.7E-01 | 3.6E-01  | 8.2E-01                                        | 8.3E-01   | 2.5E-01 | 9.9E-02 | 3.6E-01  |
| 5.02           | rs9686661  | <i>MAP3K1</i>        | 5   | 55897543        | 8.1E-01                                      | 3.8E-01   | 8.9E-01 | 7.5E-01 | 1.2E-01  | 4.4E-01                                        | 4.2E-01   | 9.4E-01 | 4.7E-01 | 1.3E-01  |
| 5.03           | rs12916    | <i>HMGCR</i>         | 5   | 74692295        | 3.6E-01                                      | 2.5E-01   | 8.7E-01 | 6.4E-01 | 7.9E-01  | 4.7E-01                                        | 1.6E-01   | 5.3E-01 | 9.1E-01 | 7.8E-01  |
| 5.04           | rs4530754  | <i>CSNK1G3</i>       | 5   | 122883315       | 2.4E-01                                      | 1.3E-01   | 8.5E-01 | 9.9E-01 | 4.2E-01  | 2.7E-01                                        | 1.2E-01   | 8.2E-01 | 6.7E-01 | 4.0E-01  |
| 5.05           | rs6882076  | <i>TIMD4</i>         | 5   | 156322875       | 3.9E-01                                      | 3.0E-01   | 1.9E-01 | 7.8E-01 | 4.2E-01  | 1.8E-01                                        | 2.0E-01   | 5.2E-01 | 4.8E-01 | 4.1E-01  |
| 6.01           | rs3757354  | <i>MYLIP</i>         | 6   | 16235386        | 5.0E-03                                      | 2.2E-02   | 1.6E-01 | 1.2E-01 | 2.2E-01  | 6.4E-03                                        | 1.6E-02   | 1.0E-01 | 3.7E-02 | 2.2E-01  |
| 6.02           | rs1800562  | <i>HFE</i>           | 6   | 26201120        | 8.5E-01                                      | 1.4E-01   | 1.4E-01 | 3.2E-01 | 3.1E-01  | 6.2E-01                                        | 1.3E-01   | 1.4E-01 | 2.1E-01 | 3.2E-01  |
| 6.03           | rs3177928  | <i>HLA</i>           | 6   | 32520413        | 5.6E-01                                      | 1.7E-01   | 8.3E-01 | 8.9E-01 | 2.6E-01  | 7.1E-01                                        | 3.0E-01   | 8.0E-01 | 8.9E-01 | 2.6E-01  |
| 6.04           | rs2814982  | <i>C6orf106</i>      | 6   | 34654538        | 4.3E-01                                      | 2.7E-01   | 1.4E-01 | 4.5E-02 | 8.8E-01  | 6.3E-01                                        | 4.5E-01   | 1.2E-01 | 2.4E-02 | 9.1E-01  |
| 6.05           | rs2758886  | <i>KCNK17</i>        | 6   | 39358815        | 9.9E-01                                      | 6.2E-01   | 8.0E-01 | 5.0E-01 | 1.7E-01  | 7.9E-01                                        | 7.4E-01   | 7.8E-01 | 8.0E-01 | 1.5E-01  |
| 6.06           | rs998584   | <i>VEGFA</i>         | 6   | 43865874        | 7.8E-01                                      | 6.5E-01   | 1.6E-01 | 9.1E-01 | 1.2E-01  | 5.1E-01                                        | 7.3E-01   | 2.2E-01 | 9.4E-01 | 1.2E-01  |
| 6.07           | rs9488822  | <i>FRK</i>           | 6   | 116419586       | 2.1E-02                                      | 2.5E-02   | 2.6E-01 | 3.6E-01 | 8.9E-01  | 5.2E-02                                        | 5.9E-02   | 4.4E-01 | 8.5E-01 | 9.0E-01  |
| 6.08           | rs1936800  | <i>RSPO3</i>         | 6   | 127477757       | 4.4E-01                                      | 5.7E-01   | 4.8E-01 | 8.8E-01 | 3.3E-01  | 4.5E-01                                        | 7.3E-01   | 2.5E-01 | 9.7E-01 | 3.5E-01  |
| 6.09           | rs9376090  | <i>HBS1L</i>         | 6   | 135452921       | 1.5E-01                                      | 3.6E-01   | 2.9E-01 | 3.8E-02 | 8.6E-01  | 1.8E-01                                        | 4.3E-01   | 5.7E-01 | 7.8E-02 | 8.9E-01  |
| 6.10           | rs605066   | <i>CITED2</i>        | 6   | 139871359       | 4.6E-01                                      | 2.1E-01   | 2.8E-01 | 5.8E-01 | 2.3E-01  | 3.5E-01                                        | 3.9E-01   | 3.7E-01 | 5.2E-01 | 2.1E-01  |
| 6.11           | rs1564348  | <i>LPA</i>           | 6   | 160498850       | 7.5E-02                                      | 1.1E-01   | 4.9E-01 | 3.7E-01 | 1.0E-01  | 6.2E-02                                        | 1.4E-01   | 2.8E-01 | 6.5E-01 | 9.5E-02  |
| 6.12           | rs10455872 | <i>LPA - delta</i>   | 6   | 160930108       | 5.3E-04                                      | 1.1E-04   | 2.4E-03 | 5.0E-04 | 6.6E-01  | 7.2E-05                                        | 3.7E-05   | 1.6E-04 | 9.6E-05 | 6.3E-01  |
| 7.01           | rs1997243  | <i>GPR146</i>        | 7   | 1050303         | 1.0E+00                                      | 4.0E-01   | 7.9E-01 | 8.6E-01 | 8.2E-01  | 9.2E-01                                        | 3.3E-01   | 7.5E-01 | 6.5E-01 | 8.4E-01  |
| 7.02           | rs702485   | <i>DAGLB</i>         | 7   | 6415797         | 4.7E-01                                      | 6.2E-01   | 5.0E-01 | 8.1E-01 | 2.0E-01  | 7.9E-01                                        | 5.1E-01   | 6.9E-01 | 7.6E-01 | 2.0E-01  |
| 7.03           | rs4142995  | <i>SNX13</i>         | 7   | 17885783        | 8.5E-01                                      | 9.8E-01   | 2.8E-01 | 7.3E-01 | 2.9E-01  | 9.8E-01                                        | 8.5E-01   | 9.8E-02 | 8.7E-01 | 2.9E-01  |
| 7.04           | rs2285942  | <i>DNAH11</i>        | 7   | 21549442        | 1.5E-01                                      | 2.9E-01   | 5.7E-01 | 9.0E-01 | 6.7E-01  | 3.0E-01                                        | 5.3E-01   | 7.2E-01 | 6.5E-01 | 6.9E-01  |
| 7.05           | rs4722551  | <i>MIR148A</i>       | 7   | 25958351        | 2.9E-01                                      | 2.7E-01   | 5.6E-01 | 3.8E-01 | 7.5E-02  | 2.6E-01                                        | 2.4E-01   | 5.2E-01 | 1.8E-01 | 8.2E-02  |
| 7.06           | rs2072183  | <i>NPC1L1</i>        | 7   | 44545705        | 4.0E-01                                      | 2.7E-01   | 3.6E-01 | 6.8E-01 | 7.9E-01  | 7.4E-01                                        | 5.9E-01   | 6.7E-01 | 2.3E-01 | 7.7E-01  |
| 7.07           | rs4917014  | <i>IKZF1</i>         | 7   | 50276409        | 9.3E-01                                      | 6.6E-01   | 3.2E-01 | 3.8E-01 | 6.0E-01  | 9.7E-01                                        | 4.1E-01   | 1.1E-01 | 7.8E-01 | 5.8E-01  |
| 7.08           | rs7811265  | <i>MLXIPL</i>        | 7   | 72572446        | 1.3E-01                                      | 1.7E-01   | 5.7E-01 | 7.8E-01 | 2.3E-01  | 1.9E-01                                        | 4.9E-02   | 2.5E-01 | 8.3E-01 | 2.2E-01  |
| 7.09           | rs38855    | <i>MET</i>           | 7   | 116145280       | 4.9E-01                                      | 1.6E-01   | 2.9E-01 | 5.8E-01 | 3.3E-02  | 8.5E-01                                        | 2.8E-01   | 2.9E-01 | 4.5E-01 | 3.8E-02  |
| 7.10           | rs4731702  | <i>KLF14</i>         | 7   | 130083924       | 7.9E-01                                      | 9.3E-01   | 7.7E-01 | 9.5E-01 | 6.6E-01  | 6.2E-01                                        | 8.0E-01   | 5.6E-01 | 8.6E-01 | 6.7E-01  |
| 7.11           | rs17173637 | <i>TMEM176A</i>      | 7   | 150160382       | 9.7E-01                                      | 6.1E-01   | 9.4E-01 | 5.2E-01 | 2.2E-01  | 5.0E-01                                        | 8.4E-01   | 7.3E-01 | 9.8E-01 | 2.0E-01  |
| 8.01           | rs9987289  | <i>PPP1R3B</i>       | 8   | 9220768         | 8.1E-01                                      | 9.3E-01   | 8.7E-01 | 7.2E-01 | 3.7E-01  | 8.3E-01                                        | 9.1E-01   | 7.8E-01 | 7.1E-01 | 3.8E-01  |
| 8.02           | rs11776767 | <i>PINX1</i>         | 8   | 10721339        | 5.9E-01                                      | 9.9E-01   | 1.0E+00 | 7.9E-01 | 9.8E-01  | 2.5E-01                                        | 5.8E-01   | 7.5E-01 | 5.5E-01 | 9.9E-01  |
| 8.03           | rs1495743  | <i>NAT2</i>          | 8   | 18317580        | 5.0E-01                                      | 5.1E-01   | 4.6E-01 | 7.8E-01 | 7.7E-01  | 5.5E-01                                        | 3.9E-01   | 5.9E-01 | 8.8E-01 | 7.3E-01  |
| 8.04           | rs12678919 | <i>LPL</i>           | 8   | 19888502        | 9.8E-01                                      | 2.2E-01   | 1.1E-01 | 1.8E-01 | 1.6E-01  | 8.2E-01                                        | 9.3E-01   | 5.9E-01 | 1.4E-01 | 1.5E-01  |
| 8.05           | rs10102164 | <i>SOX17</i>         | 8   | 55584167        | 4.8E-01                                      | 5.9E-01   | 7.0E-01 | 6.9E-01 | 9.6E-01  | 3.3E-01                                        | 7.1E-01   | 9.0E-01 | 6.5E-01 | 9.8E-01  |
| 8.06           | rs1030431  | <i>CYP7A1</i>        | 8   | 59474251        | 6.0E-01                                      | 9.9E-01   | 3.3E-01 | 5.1E-01 | 1.5E-01  | 6.2E-01                                        | 6.1E-01   | 2.3E-01 | 6.6E-01 | 1.4E-01  |
| 8.07           | rs2293889  | <i>TRPS1</i>         | 8   | 116668374       | 5.4E-01                                      | 2.3E-01   | 1.2E-02 | 5.9E-01 | 9.2E-01  | 9.9E-01                                        | 2.0E-01   | 1.9E-02 | 9.7E-01 | 9.3E-01  |
| 8.08           | rs2954029  | <i>TRIB1</i>         | 8   | 126560154       | 6.3E-01                                      | 5.1E-01   | 8.5E-02 | 3.1E-01 | 1.3E-01  | 5.3E-01                                        | 6.3E-01   | 4.9E-01 | 8.5E-01 | 1.3E-01  |
| 8.09           | rs11136341 | <i>PLEC1</i>         | 8   | 145115531       | 9.7E-01                                      | 8.5E-01   | 7.5E-01 | 5.2E-01 | 7.2E-01  | 6.2E-01                                        | 7.8E-01   | 5.7E-01 | 6.1E-01 | 7.1E-01  |
| 9.01           | rs3780181  | <i>VLDLR</i>         | 9   | 2630759         | 8.4E-01                                      | 6.5E-01   | 5.8E-01 | 9.9E-01 | 5.9E-01  | 5.8E-01                                        | 6.1E-01   | 4.8E-01 | 8.7E-01 | 5.8E-01  |
| 9.02           | rs643531   | <i>TTC39B</i>        | 9   | 15286034        | 9.6E-01                                      | 8.2E-01   | 2.0E-01 | 4.5E-01 | 4.9E-01  | 3.1E-01                                        | 9.0E-01   | 3.2E-01 | 9.7E-01 | 5.1E-01  |

| Cluster number | rsID       | Locus Name             | Chr | Position (hg18) | Absolute Change ( $p_{\text{interaction}}$ ) |           |         |         |          | Percentage Change ( $p_{\text{interaction}}$ ) |           |         |         |          |
|----------------|------------|------------------------|-----|-----------------|----------------------------------------------|-----------|---------|---------|----------|------------------------------------------------|-----------|---------|---------|----------|
|                |            |                        |     |                 | LDL-C                                        | non-HDL-C | apo B   | LDL-P   | LDL-size | LDL-C                                          | non-HDL-C | apo B   | LDL-P   | LDL-size |
| 9.03           | rs1883025  | <i>ABCA1</i>           | 9   | 106704122       | 2.0E-01                                      | 2.9E-01   | 4.4E-01 | 2.8E-01 | 4.5E-01  | 5.8E-01                                        | 5.5E-01   | 7.3E-01 | 7.1E-01 | 4.6E-01  |
| 9.04           | rs649129   | <i>ABO</i>             | 9   | 135144125       | 5.8E-02                                      | 2.4E-01   | 2.2E-01 | 6.9E-01 | 6.7E-01  | 3.8E-02                                        | 8.3E-02   | 8.7E-02 | 6.9E-01 | 6.9E-01  |
| 10.01          | rs1832007  | <i>AKR1C4</i>          | 10  | 5244847         | 1.4E-02                                      | 5.5E-02   | 9.1E-02 | 5.3E-01 | 4.2E-01  | 1.6E-02                                        | 4.3E-02   | 6.7E-02 | 9.1E-01 | 4.0E-01  |
| 10.02          | rs10904908 | <i>TRDMT1</i>          | 10  | 17300296        | 6.5E-01                                      | 1.3E-01   | 7.0E-02 | 2.5E-01 | 7.8E-01  | 5.0E-01                                        | 2.1E-01   | 4.2E-02 | 4.5E-01 | 8.0E-01  |
| 10.03          | rs970548   | <i>MARCH8-ALOX5</i>    | 10  | 45333283        | 9.2E-01                                      | 7.5E-01   | 7.7E-01 | 5.9E-01 | 3.6E-01  | 3.9E-01                                        | 4.6E-01   | 9.2E-01 | 6.9E-01 | 3.9E-01  |
| 10.04          | rs10761731 | <i>JMJD1C</i>          | 10  | 64697616        | 1.8E-02                                      | 1.8E-01   | 4.1E-01 | 9.6E-01 | 5.1E-01  | 3.0E-02                                        | 7.6E-02   | 1.9E-01 | 9.4E-01 | 5.4E-01  |
| 10.05          | rs2068888  | <i>CYP26A1</i>         | 10  | 94829632        | 8.7E-01                                      | 9.9E-01   | 5.4E-01 | 9.7E-01 | 6.9E-01  | 4.7E-01                                        | 6.4E-01   | 5.2E-01 | 9.4E-01 | 7.4E-01  |
| 10.06          | rs2255141  | <i>GPAM</i>            | 10  | 113923876       | 4.6E-01                                      | 6.2E-01   | 4.3E-01 | 5.5E-01 | 9.6E-01  | 3.9E-01                                        | 5.6E-01   | 3.5E-01 | 5.2E-01 | 9.8E-01  |
| 11.01          | rs2923084  | <i>AMPD3</i>           | 11  | 10345358        | 3.9E-01                                      | 2.1E-01   | 2.1E-01 | 9.7E-01 | 2.2E-01  | 4.7E-01                                        | 2.4E-01   | 3.5E-01 | 7.5E-01 | 2.1E-01  |
| 11.02          | rs10832963 | <i>SPTY2D1</i>         | 11  | 18620817        | 6.9E-01                                      | 7.6E-01   | 2.4E-01 | 5.7E-02 | 7.3E-01  | 7.8E-01                                        | 9.9E-01   | 2.3E-01 | 1.1E-01 | 7.1E-01  |
| 11.03          | rs3136441  | <i>LRP4</i>            | 11  | 46699823        | 8.4E-01                                      | 5.1E-01   | 7.0E-01 | 8.5E-01 | 7.0E-01  | 4.8E-01                                        | 5.0E-01   | 9.7E-01 | 8.8E-01 | 7.4E-01  |
| 11.04          | rs11246602 | <i>OR4C46</i>          | 11  | 51368666        | 3.6E-01                                      | 3.8E-01   | 1.8E-01 | 3.3E-01 | 8.3E-02  | 3.6E-01                                        | 3.8E-01   | 2.9E-01 | 8.7E-01 | 9.6E-02  |
| 11.05          | rs174546   | <i>FADS123</i>         | 11  | 61326406        | 1.4E-01                                      | 2.3E-02   | 2.2E-02 | 3.5E-01 | 7.8E-01  | 3.1E-01                                        | 5.8E-02   | 4.8E-02 | 9.0E-01 | 7.4E-01  |
| 11.06          | rs12801636 | <i>KAT5</i>            | 11  | 65147893        | 9.7E-01                                      | 9.5E-01   | 4.6E-01 | 6.4E-01 | 5.2E-01  | 9.8E-01                                        | 8.3E-01   | 6.4E-01 | 7.8E-01 | 5.2E-01  |
| 11.07          | rs499974   | <i>MOGAT2-DGAT2</i>    | 11  | 75132669        | 6.8E-01                                      | 9.0E-01   | 1.7E-01 | 3.2E-01 | 5.5E-01  | 8.7E-01                                        | 9.7E-01   | 3.1E-01 | 5.9E-01 | 6.1E-01  |
| 11.08          | rs964184   | <i>APOA1C3A4A5</i>     | 11  | 116154127       | 1.4E-01                                      | 6.4E-01   | 6.9E-01 | 4.3E-01 | 3.0E-03  | 8.4E-01                                        | 2.5E-01   | 2.8E-01 | 7.5E-01 | 2.8E-03  |
| 11.09          | rs11603023 | <i>PHLDB1</i>          | 11  | 117991277       | 8.5E-01                                      | 9.5E-01   | 4.5E-01 | 3.9E-01 | 4.2E-01  | 4.9E-01                                        | 8.4E-01   | 4.5E-01 | 2.2E-01 | 4.3E-01  |
| 11.10          | rs7941030  | <i>UBASH3B</i>         | 11  | 122027585       | 9.6E-01                                      | 8.6E-01   | 7.2E-01 | 3.0E-01 | 7.9E-01  | 7.4E-01                                        | 6.5E-01   | 8.8E-01 | 2.1E-01 | 8.0E-01  |
| 11.11          | rs11220462 | <i>ST3GAL4</i>         | 11  | 125749162       | 7.7E-03                                      | 5.0E-02   | 4.9E-02 | 7.7E-01 | 6.8E-01  | 2.2E-03                                        | 8.4E-03   | 1.8E-02 | 9.3E-01 | 6.9E-01  |
| 12.01          | rs4883201  | <i>PHC1-A2ML1</i>      | 12  | 8973848         | 1.0E-01                                      | 1.2E-01   | 6.3E-01 | 4.3E-01 | 5.8E-01  | 7.6E-01                                        | 5.9E-01   | 9.7E-01 | 5.2E-01 | 5.9E-01  |
| 12.02          | rs7134375  | <i>PDE3A</i>           | 12  | 20365025        | 5.6E-02                                      | 6.2E-02   | 1.1E-01 | 3.3E-01 | 8.2E-01  | 4.4E-01                                        | 1.2E-01   | 3.6E-02 | 1.3E-01 | 8.3E-01  |
| 12.03          | rs12317268 | <i>SLCO1B1 - delta</i> | 12  | 21243808        | 4.2E-04                                      | 4.5E-03   | 7.6E-03 | 3.3E-01 | 2.7E-04  | 4.9E-04                                        | 5.1E-03   | 3.1E-03 | 1.7E-01 | 2.7E-04  |
| 12.04          | rs11613352 | <i>LRP1</i>            | 12  | 56078847        | 3.2E-01                                      | 4.5E-01   | 9.2E-01 | 8.6E-01 | 6.2E-01  | 5.9E-01                                        | 9.3E-01   | 4.3E-01 | 5.0E-01 | 6.0E-01  |
| 12.05          | rs7134594  | <i>MVK</i>             | 12  | 108484576       | 8.0E-02                                      | 4.2E-02   | 2.8E-01 | 6.9E-01 | 8.0E-01  | 7.4E-01                                        | 2.4E-01   | 7.5E-01 | 9.0E-01 | 8.0E-01  |
| 12.06          | rs11065987 | <i>BRAP</i>            | 12  | 110556807       | 2.8E-01                                      | 5.9E-01   | 8.6E-01 | 7.2E-01 | 2.5E-01  | 1.9E-01                                        | 5.1E-01   | 9.1E-01 | 8.3E-01 | 2.5E-01  |
| 12.07          | rs1169288  | <i>HNF1A</i>           | 12  | 119901033       | 4.4E-01                                      | 6.6E-01   | 8.4E-01 | 6.7E-01 | 8.3E-01  | 3.9E-01                                        | 7.7E-01   | 8.7E-01 | 4.2E-01 | 8.3E-01  |
| 12.08          | rs4759375  | <i>SBNO1</i>           | 12  | 122362191       | 1.3E-01                                      | 2.3E-01   | 1.0E-01 | 4.2E-02 | 9.7E-01  | 9.0E-02                                        | 1.9E-01   | 5.1E-02 | 5.8E-03 | 9.7E-01  |
| 12.09          | rs4765127  | <i>ZNF664</i>          | 12  | 123026120       | 3.0E-01                                      | 2.2E-01   | 7.2E-01 | 2.9E-01 | 8.8E-01  | 3.0E-01                                        | 3.4E-01   | 9.4E-01 | 3.5E-01 | 8.5E-01  |
| 12.10          | rs838880   | <i>SCARB1</i>          | 12  | 123827546       | 8.4E-02                                      | 5.4E-02   | 6.9E-02 | 8.5E-01 | 2.1E-01  | 8.9E-02                                        | 1.6E-01   | 6.0E-02 | 5.6E-01 | 2.2E-01  |
| 13.01          | rs4942486  | <i>BRCA2</i>           | 13  | 31851388        | 8.6E-01                                      | 5.5E-01   | 9.2E-01 | 9.5E-02 | 4.6E-01  | 7.3E-01                                        | 7.2E-01   | 8.1E-01 | 4.1E-01 | 4.5E-01  |
| 14.01          | rs2332328  | <i>NYNRIN</i>          | 14  | 23952898        | 1.0E-01                                      | 1.6E-01   | 1.9E-01 | 3.0E-01 | 1.3E-01  | 5.8E-01                                        | 2.8E-01   | 2.2E-01 | 1.7E-01 | 1.3E-01  |
| 14.02          | rs4983559  | <i>ZBTB42-AKT1</i>     | 14  | 104348254       | 3.3E-01                                      | 8.4E-01   | 4.4E-01 | 9.5E-01 | 9.5E-02  | 2.9E-01                                        | 3.6E-01   | 2.6E-01 | 7.0E-01 | 9.6E-02  |
| 15.01          | rs8035382  | <i>FRMD5</i>           | 15  | 42031815        | 2.0E-01                                      | 2.1E-01   | 7.3E-01 | 9.8E-01 | 3.8E-01  | 5.5E-02                                        | 6.5E-02   | 4.9E-01 | 8.3E-01 | 3.7E-01  |
| 15.02          | rs1532085  | <i>LIPC</i>            | 15  | 56470658        | 6.3E-01                                      | 5.7E-01   | 6.8E-01 | 8.8E-01 | 3.1E-01  | 9.2E-01                                        | 5.5E-01   | 8.5E-01 | 5.5E-01 | 3.6E-01  |
| 15.03          | rs2652834  | <i>LACTB</i>           | 15  | 61183920        | 6.6E-01                                      | 6.9E-01   | 4.7E-01 | 1.3E-01 | 5.1E-01  | 5.3E-01                                        | 4.8E-01   | 8.6E-01 | 7.7E-02 | 5.3E-01  |
| 16.01          | rs3198697  | <i>PDXDC1</i>          | 16  | 15037441        | 5.9E-01                                      | 5.7E-01   | 3.3E-01 | 2.6E-01 | 4.3E-01  | 8.7E-01                                        | 8.0E-01   | 7.8E-01 | 4.8E-01 | 4.2E-01  |
| 16.02          | rs11649653 | <i>CTF1</i>            | 16  | 30825988        | 9.5E-01                                      | 9.7E-01   | 1.2E-01 | 4.0E-01 | 5.1E-01  | 5.5E-01                                        | 6.2E-01   | 6.6E-01 | 8.1E-01 | 5.3E-01  |
| 16.03          | rs1121980  | <i>FTO</i>             | 16  | 52366748        | 9.5E-01                                      | 5.4E-01   | 7.2E-01 | 6.2E-01 | 8.2E-01  | 9.5E-01                                        | 6.6E-01   | 3.5E-01 | 4.4E-01 | 8.4E-01  |
| 16.04          | rs3764261  | <i>CETP</i>            | 16  | 55550825        | 4.5E-01                                      | 9.4E-01   | 7.3E-01 | 7.1E-01 | 3.4E-04  | 7.3E-01                                        | 4.6E-01   | 3.9E-01 | 7.5E-01 | 3.9E-04  |
| 16.05          | rs16942887 | <i>LCAT</i>            | 16  | 66485543        | 3.1E-01                                      | 2.0E-01   | 7.0E-03 | 1.8E-01 | 5.6E-01  | 8.2E-02                                        | 9.8E-02   | 3.2E-03 | 6.0E-01 | 5.5E-01  |
| 16.06          | rs2000999  | <i>HPR</i>             | 16  | 70665594        | 7.7E-01                                      | 9.3E-01   | 7.1E-01 | 7.1E-01 | 5.2E-01  | 9.4E-01                                        | 9.4E-01   | 8.8E-01 | 8.9E-01 | 4.8E-01  |
| 16.07          | rs2925979  | <i>CMIP</i>            | 16  | 80092291        | 3.9E-02                                      | 1.3E-02   | 1.1E-01 | 6.5E-01 | 7.6E-01  | 3.5E-02                                        | 3.3E-02   | 1.7E-01 | 1.8E-01 | 7.9E-01  |
| 17.01          | rs314253   | <i>DLG4</i>            | 17  | 7032374         | 9.5E-01                                      | 6.1E-01   | 8.7E-01 | 5.8E-01 | 7.7E-01  | 9.4E-01                                        | 5.9E-01   | 6.8E-01 | 6.9E-01 | 1.8E-01  |
| 17.02          | rs881844   | <i>STARD3</i>          | 17  | 35063744        | 5.7E-01                                      | 6.4E-01   | 9.3E-01 | 9.0E-01 | 3.2E-01  | 6.9E-01                                        | 7.9E-01   | 9.1E-01 | 9.3E-01 | 3.2E-01  |
| 17.03          | rs8077889  | <i>MPP3</i>            | 17  | 39233692        | 5.7E-01                                      | 2.6E-01   | 9.1E-01 | 7.1E-01 | 2.1E-01  | 8.4E-01                                        | 4.5E-01   | 7.5E-01 | 1.5E-01 | 2.2E-01  |

| Cluster number | rsID       | Locus Name          | Chr | Position (hg18) | Absolute Change ( $p_{\text{interaction}}$ ) |           |         |         |          | Percentage Change ( $p_{\text{interaction}}$ ) |           |         |         |          |
|----------------|------------|---------------------|-----|-----------------|----------------------------------------------|-----------|---------|---------|----------|------------------------------------------------|-----------|---------|---------|----------|
|                |            |                     |     |                 | LDL-C                                        | non-HDL-C | apo B   | LDL-P   | LDL-size | LDL-C                                          | non-HDL-C | apo B   | LDL-P   | LDL-size |
| 17.04          | rs7225700  | <i>OSBPL7</i>       | 17  | 42746803        | 4.7E-01                                      | 9.4E-01   | 8.1E-01 | 2.7E-01 | 1.7E-01  | 3.2E-01                                        | 6.3E-01   | 5.9E-01 | 4.8E-02 | 1.7E-01  |
| 17.05          | rs1801689  | <i>APOH-PRXCA</i>   | 17  | 61641042        | 6.0E-01                                      | 6.0E-01   | 6.5E-01 | 5.0E-01 | 8.4E-01  | 9.6E-01                                        | 8.8E-01   | 8.4E-01 | 4.4E-01 | 8.4E-01  |
| 17.06          | rs4148008  | <i>ABCA8</i>        | 17  | 64386889        | 2.0E-01                                      | 6.7E-01   | 9.5E-01 | 9.6E-01 | 8.1E-01  | 1.3E-01                                        | 1.0E+00   | 7.1E-01 | 9.0E-01 | 8.2E-01  |
| 17.07          | rs4082919  | <i>PGS1</i>         | 17  | 73889077        | 7.7E-01                                      | 7.7E-01   | 7.2E-01 | 8.6E-01 | 6.9E-02  | 9.6E-01                                        | 8.4E-01   | 9.5E-01 | 7.1E-01 | 6.4E-02  |
| 18.01          | rs7241918  | <i>LPG</i>          | 18  | 45414951        | 3.9E-01                                      | 3.6E-01   | 6.8E-01 | 8.3E-01 | 5.7E-01  | 3.6E-01                                        | 3.1E-01   | 8.8E-01 | 5.6E-01 | 5.9E-01  |
| 18.02          | rs12967135 | <i>MC4R</i>         | 18  | 56000003        | 8.6E-01                                      | 7.9E-01   | 6.1E-01 | 6.3E-01 | 4.3E-02  | 5.6E-01                                        | 5.7E-01   | 4.3E-01 | 9.0E-01 | 4.1E-02  |
| 19.01          | rs7248104  | <i>INSR</i>         | 19  | 7175431         | 7.1E-01                                      | 7.6E-01   | 3.5E-01 | 4.2E-01 | 8.1E-01  | 2.9E-01                                        | 4.5E-01   | 2.6E-01 | 1.8E-01 | 8.1E-01  |
| 19.02          | rs7255436  | <i>ANGPTL4</i>      | 19  | 8339196         | 7.1E-03                                      | 1.3E-02   | 1.1E-01 | 5.6E-01 | 3.0E-02  | 1.4E-02                                        | 3.6E-03   | 3.4E-02 | 6.8E-01 | 3.5E-02  |
| 19.03          | rs11672123 | <i>LDLR - delta</i> | 19  | 11055823        | 6.4E-02                                      | 1.5E-02   | 2.8E-05 | 2.7E-02 | 2.5E-02  | 1.1E-01                                        | 1.5E-02   | 9.8E-05 | 6.6E-02 | 2.5E-02  |
| 19.04          | rs6511720  | <i>LDLR</i>         | 19  | 11063306        | 2.0E-01                                      | 7.6E-01   | 2.4E-01 | 1.9E-01 | 9.3E-01  | 4.2E-02                                        | 3.4E-01   | 8.5E-02 | 8.9E-02 | 8.8E-01  |
| 19.05          | rs737337   | <i>LOC55908</i>     | 19  | 11208493        | 2.1E-01                                      | 2.4E-01   | 3.6E-01 | 5.3E-02 | 2.8E-01  | 8.8E-02                                        | 4.2E-01   | 5.1E-01 | 1.9E-01 | 2.6E-01  |
| 19.06          | rs10401969 | <i>CILP2</i>        | 19  | 19268718        | 6.9E-01                                      | 2.6E-01   | 2.7E-02 | 1.8E-01 | 8.1E-01  | 8.5E-01                                        | 9.7E-01   | 1.5E-01 | 4.7E-01 | 8.3E-01  |
| 19.07          | rs731839   | <i>PEPD</i>         | 19  | 38590905        | 1.9E-01                                      | 1.4E-01   | 4.6E-01 | 2.1E-01 | 5.9E-01  | 1.3E-01                                        | 1.9E-01   | 2.7E-01 | 5.5E-02 | 6.0E-01  |
| 19.08          | rs7412     | <i>APOE - delta</i> | 19  | 50103919        | 8.7E-01                                      | 5.9E-01   | 1.4E-01 | 6.0E-02 | 5.1E-01  | 8.9E-04                                        | 1.1E-01   | 2.5E-03 | 2.2E-02 | 5.0E-01  |
| 19.09          | rs4420638  | <i>APOEC1C2</i>     | 19  | 50114786        | 2.5E-01                                      | 5.3E-01   | 3.7E-01 | 3.8E-01 | 4.0E-01  | 5.4E-02                                        | 1.6E-01   | 3.7E-01 | 6.5E-01 | 4.1E-01  |
| 19.10          | rs492602   | <i>FLJ36070</i>     | 19  | 53898229        | 8.7E-01                                      | 3.9E-01   | 7.1E-01 | 2.3E-01 | 7.2E-01  | 8.5E-01                                        | 4.2E-01   | 7.6E-01 | 4.8E-01 | 6.4E-01  |
| 19.11          | rs17695224 | <i>HAS1</i>         | 19  | 57016028        | 7.2E-01                                      | 5.4E-01   | 8.9E-01 | 8.9E-01 | 9.0E-01  | 6.7E-01                                        | 5.4E-01   | 4.1E-01 | 5.1E-01 | 9.7E-01  |
| 19.12          | rs386000   | <i>LILRA3</i>       | 19  | 59484573        | 3.8E-01                                      | 8.3E-01   | 8.4E-01 | 6.9E-01 | 5.6E-01  | 2.1E-01                                        | 7.9E-01   | 6.8E-01 | 5.1E-01 | 5.9E-01  |
| 20.01          | rs364585   | <i>SPTLC3</i>       | 20  | 12910718        | 7.6E-01                                      | 8.8E-01   | 1.6E-01 | 5.8E-01 | 9.4E-01  | 9.9E-01                                        | 7.7E-01   | 3.0E-01 | 9.3E-01 | 9.1E-01  |
| 20.02          | rs2328223  | <i>SNX5</i>         | 20  | 17793921        | 6.3E-01                                      | 4.0E-01   | 4.0E-01 | 1.4E-01 | 3.4E-01  | 5.7E-01                                        | 5.1E-01   | 4.3E-01 | 2.9E-01 | 3.5E-01  |
| 20.03          | rs2277862  | <i>ERGIC3</i>       | 20  | 33616196        | 9.5E-01                                      | 7.8E-01   | 3.2E-01 | 1.6E-02 | 9.4E-02  | 6.8E-01                                        | 9.2E-01   | 4.3E-01 | 3.9E-02 | 9.9E-02  |
| 20.04          | rs2902940  | <i>MAFB</i>         | 20  | 38524901        | 4.2E-01                                      | 9.1E-01   | 7.3E-01 | 6.1E-01 | 9.5E-01  | 8.9E-01                                        | 5.7E-01   | 9.8E-01 | 8.4E-01 | 9.7E-01  |
| 20.05          | rs909802   | <i>TOP1</i>         | 20  | 39370229        | 3.1E-01                                      | 8.1E-01   | 6.0E-01 | 1.9E-01 | 5.4E-01  | 4.4E-01                                        | 6.9E-01   | 4.1E-01 | 1.5E-01 | 5.2E-01  |
| 20.06          | rs1800961  | <i>HNF4A</i>        | 20  | 42475778        | 7.0E-01                                      | 7.9E-01   | 4.6E-01 | 2.5E-01 | 7.9E-01  | 3.6E-01                                        | 9.3E-01   | 4.5E-01 | 1.0E-01 | 8.5E-01  |
| 20.07          | rs6065906  | <i>PLTP</i>         | 20  | 43987422        | 4.6E-02                                      | 5.2E-02   | 9.1E-03 | 9.6E-02 | 8.3E-01  | 1.5E-01                                        | 2.2E-01   | 5.0E-02 | 3.1E-01 | 8.4E-01  |
| 22.01          | rs181362   | <i>UBE2L3</i>       | 22  | 20262068        | 9.0E-01                                      | 6.7E-01   | 3.8E-01 | 1.4E-01 | 6.8E-01  | 8.4E-01                                        | 9.3E-01   | 3.6E-01 | 1.1E-01 | 6.3E-01  |
| 22.02          | rs5763662  | <i>MTMR3</i>        | 22  | 28708703        | 6.3E-01                                      | 7.1E-01   | 9.2E-01 | 8.5E-01 | 3.6E-01  | 2.8E-01                                        | 1.6E-01   | 5.3E-01 | 7.8E-01 | 3.7E-01  |
| 22.03          | rs138777   | <i>TOM1</i>         | 22  | 34041098        | 2.9E-01                                      | 6.9E-02   | 9.3E-02 | 4.0E-02 | 6.3E-01  | 9.2E-02                                        | 1.4E-02   | 5.8E-02 | 9.1E-02 | 6.2E-01  |
| 22.04          | rs5756931  | <i>PLA2G6</i>       | 22  | 36875979        | 3.1E-01                                      | 1.1E-01   | 1.8E-02 | 5.3E-01 | 9.9E-01  | 3.5E-01                                        | 1.3E-01   | 1.6E-02 | 6.6E-01 | 9.8E-01  |
| 22.05          | rs4253772  | <i>PPARA</i>        | 22  | 45006267        | 8.5E-02                                      | 4.2E-01   | 2.2E-01 | 3.3E-01 | 9.1E-02  | 5.2E-02                                        | 3.7E-01   | 3.0E-01 | 1.5E-01 | 9.7E-02  |

Cluster number: unique numeric identifier for each of the SNPs in the analysis

rsID: SNP name

Chr: chromosome

Beta (q): Beta-coefficient from inverse-quantile transformed data

R<sup>2</sup>: variance explained by SNP

**Supplemental Table 7:** Results from Gene Set Enrichment Analysis (GSEA) of the LDL-P genetic cluster and LDL-size genetic cluster

| Trait cluster | Pathway                           | X <sup>2</sup> | P-value |
|---------------|-----------------------------------|----------------|---------|
| LDL-size (A)  | phosphatidylcholine binding       | 21.4           | 0.03    |
|               | high-density lipoprotein particle | 16.6           | 0.08    |
|               | cholesterol binding               | 16.2           | 0.09    |
|               | phosphatidylcholine binding       | 21.4           | 0.03    |
|               | high-density lipoprotein particle | 16.6           | 0.08    |
|               | cholesterol binding               | 16.2           | 0.09    |
| LDL-P (B)     | chylomicron remnant clearance     | 16.2           | 0.09    |

Chi-squared statistic and p-value calculated from chi-squared test with Yates' Continuity Correction

**Supplemental Figure 1:** Dendrogram of 14 clusters from complete linkage hierarchical clustering and variance explained in rosuvastatin-induced percentage change for LDL cholesterol (LDL-C), non-HDL cholesterol (non-HDL-C), apolipoprotein B (apo B), LDL particle number (LDL-P), and LDL particle size (LDL-size) by candidate variants ( $p < 0.05$ ).

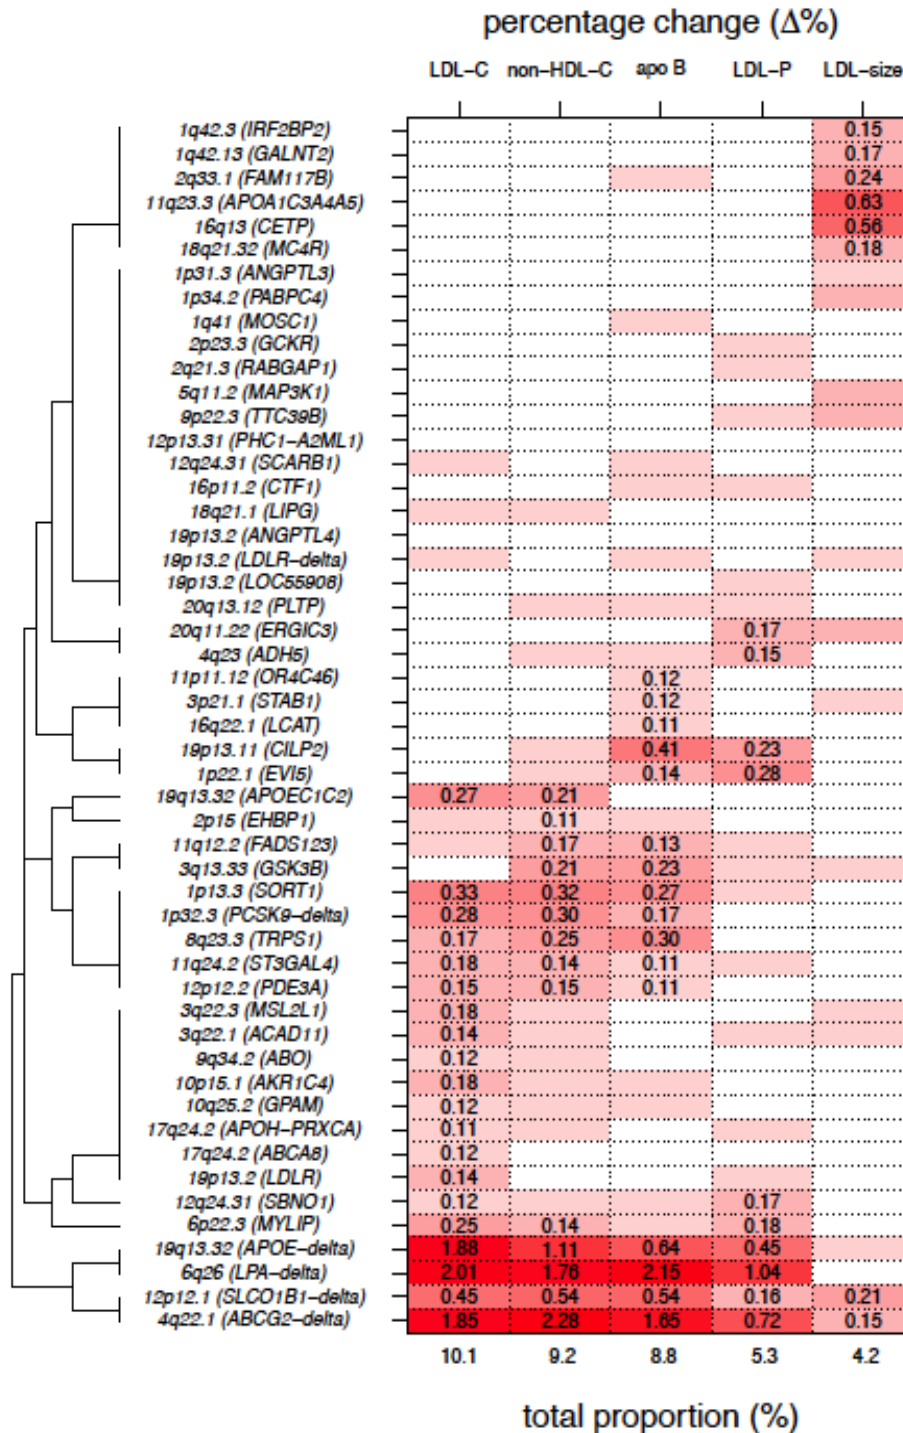

**References:**

1. Teslovich TM, Musunuru K, Smith AV, Edmondson AC, Stylianou IM, Koseki M, et al. Biological, clinical and population relevance of 95 loci for blood lipids. *Nature*. 2010;466:707-713.
2. Willer CJ, Schmidt EM, Sengupta S, Peloso GM, Gustafsson S, Kanoni S, et al. Discovery and refinement of loci associated with lipid levels. *Nat Genet*. 2013;45:1274-1283.
3. Chasman DI, Giulianini F, Macfadyen J, Barratt BJ, Nyberg F, Ridker PM. Genetic determinants Of statin---induced low---density lipoprotein cholesterol reduction: The justification for the use of statins in prevention: An intervention Trial evaluating Rosuvastatin (jupiter) trial. *Circ Cardiovasc Genet*. 2012;5:257-264.
